# Supplementary material for: Cooperative NHC and nickel-catalyzed asymmetric reductive coupling of nitrobenzyl bromides and cyclic ketiminesviaSET process
Source: Royal Society of Chemistry journal article supplement (doi:10.1039/d2qo01940j), 2023-01-01
Supplement: d2qo01940j1.pdf [file d2qo01940j1.pdf]

## Supporting Information

# **Cooperative NHC and Nickel Catalyzed Asymmetric Reductive Coupling of Nitrobenzyl Bromides and Cyclic Ketimines via SET Process**

Wen-Tian Zeng,<sup>§</sup> Xiao Han,<sup>§</sup> Gong-Bin Huang, Jiang Weng, Albert S. C. Chan, Gui  
Lu\*

Guangdong Provincial Key Laboratory of New Drug Design and Evaluation, School of  
Pharmaceutical Sciences, Sun Yat-sen University, Guangzhou 510006, P. R. China

\*E-mail: lugui@mail.sysu.edu.cn

## Table of Contents

|                                                          |            |
|----------------------------------------------------------|------------|
| <b>1. General Information</b>                            | <b>S3</b>  |
| <b>2. Reaction Optimization</b>                          | <b>S3</b>  |
| <b>3. General Procedure for the Synthesis of 3 and 5</b> | <b>S5</b>  |
| <b>4. Synthetic Transformations</b>                      | <b>S6</b>  |
| <b>5. Characterization of Compounds</b>                  | <b>S6</b>  |
| <b>6. Data for X-Ray Crystal Structures of 3d and 5d</b> | <b>S21</b> |
| <b>7. References</b>                                     | <b>S23</b> |
| <b>8. Copies of NMR Spectra</b>                          | <b>S24</b> |
| <b>9. Copies of HPLC Data</b>                            | <b>S69</b> |

## 1. General Information

All the commercial reagents were used as such without further purification. All solvents were used as commercial anhydrous grade without further purification. The flash column chromatography was carried out over silica gel (230-400 mesh).  $^1\text{H}$  and  $^{13}\text{C}$  NMR spectra were recorded on a Bruker Avance-400 MHz spectrometer or Bruker Avance-500 MHz spectrometer. Chemical shifts in  $^1\text{H}$  NMR spectra were reported in parts per million (ppm,  $\delta$ ) downfield from the internal standard  $\text{Me}_4\text{Si}$  (TMS,  $\delta = 0$  ppm). Chemical shifts in  $^{13}\text{C}$  NMR spectra were reported relative to the central line of the chloroform signal ( $\delta = 77.0$  ppm). Peaks were labeled as singlet (s), doublet (d), triplet (t), quartet (q), and multiplet (m). High resolution mass spectra were obtained with a Shimadzu LCMS-IT-TOF mass spectrometer. High performance liquid chromatography (HPLC) was conducted on an Agilent 1200 instrument using Daicel Chiralpak column IA, IC or AD-H. Optical rotations were recorded on a Rudolph Autopol I polarimeter. Chemical yields refer to pure isolated substances. Ligands purchased from DAICEL CHIRAL TECHNOLOGIES (CHINA) CO., LTD and used as received. The pyrazolone-derived ketimines, isatin-derived ketimines<sup>[1]</sup> and nitrobenzyl bromides<sup>[2]</sup> were prepared according to literature methods.

## 2. Reaction Optimization

**Table S1 Condition optimization for pyrazolone-derived ketamine with nitrobenzyl bromide<sup>a,b</sup>**

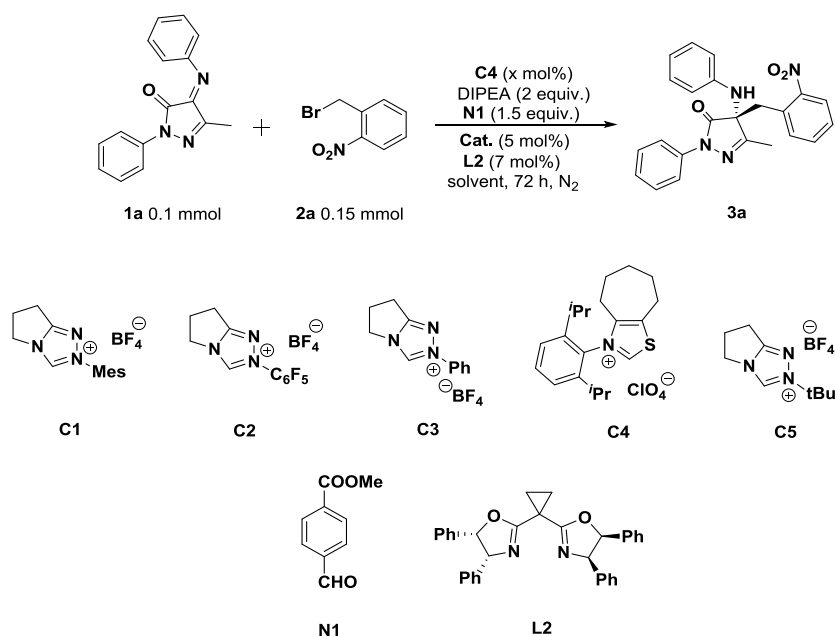

| Entry            | Precatalyst (x mol%) | Cat. (5 mol%)          | Solvent | Yield (%) | ee (%) |
|------------------|----------------------|------------------------|---------|-----------|--------|
| 1 <sup>b</sup>   | <b>C1</b> (5)        | --                     | MeOH    | 45        | --     |
| 2 <sup>b</sup>   | <b>C2</b> (5)        | --                     | MeOH    | 20        | --     |
| 3 <sup>b</sup>   | <b>C3</b> (5)        | --                     | MeOH    | 28        | --     |
| 4 <sup>b</sup>   | <b>C4</b> (5)        | --                     | MeOH    | 36        | --     |
| 5 <sup>b</sup>   | <b>C5</b> (5)        | --                     | MeOH    | 29        | --     |
| 6 <sup>b,c</sup> | <b>C4</b> (10)       | --                     | MeOH    | 60        | --     |
| 7 <sup>d</sup>   | <b>C4</b> (5)        | NiCl <sub>2</sub> ·DME | THF     | 43        | 7      |
| 8 <sup>d</sup>   | <b>C4</b> (5)        | NiCl <sub>2</sub> ·DME | PhMe    | 27        | 6      |
| 9 <sup>d</sup>   | <b>C4</b> (5)        | NiCl <sub>2</sub> ·DME | DCM     | 62        | 48     |
| 10 <sup>d</sup>  | <b>C4</b> (5)        | NiCl <sub>2</sub> ·DME | MeCN    | 43        | 75     |

|                 |               |                                                       |      |    |    |
|-----------------|---------------|-------------------------------------------------------|------|----|----|
| 11              | <b>C4</b> (5) | NiCl <sub>2</sub> ·DME                                | EtOH | 33 | 39 |
| 12 <sup>e</sup> | <b>C4</b> (5) | NiCl <sub>2</sub> ·DME                                | MeOH | ND | -- |
| 13 <sup>f</sup> | <b>C4</b> (5) | Ni(OTf) <sub>2</sub>                                  | MeOH | 21 | 78 |
| 14 <sup>f</sup> | <b>C4</b> (5) | Ni(ClO <sub>4</sub> ) <sub>2</sub> ·6H <sub>2</sub> O | MeOH | 36 | 86 |
| 15 <sup>f</sup> | <b>C4</b> (5) | NiBr <sub>2</sub> ·DME                                | MeOH | 35 | 86 |
| 16 <sup>f</sup> | <b>C4</b> (5) | Ni(OAc) <sub>2</sub> ·4H <sub>2</sub> O               | MeOH | 31 | 38 |
| 17 <sup>f</sup> | <b>C4</b> (5) | Ni(acac) <sub>2</sub>                                 | MeOH | 46 | 84 |
| 18 <sup>f</sup> | <b>C4</b> (5) | Ni(hfac) <sub>2</sub>                                 | MeOH | 35 | 47 |
| 19 <sup>f</sup> | <b>C4</b> (5) | Ni(PPh <sub>3</sub> ) <sub>2</sub> Cl <sub>2</sub>    | MeOH | 20 | 84 |
| 20 <sup>f</sup> | <b>C4</b> (5) | Ni(cod) <sub>2</sub>                                  | MeOH | 34 | 69 |
| 21 <sup>f</sup> | <b>C4</b> (5) | Nd(OTf) <sub>3</sub>                                  | MeOH | 24 | 4  |
| 22 <sup>f</sup> | <b>C4</b> (5) | Bi(OTf) <sub>3</sub>                                  | MeOH | 21 | 0  |

<sup>a</sup> Unless otherwise specified, all reactions were carried out with **1a** (0.1 mmol) and **2a** (0.15 mmol), precatalyst (x mol%), catalyst (5 mol%), **L2** (7 mol%), DIPEA (0.2 mmol), ArCHO (0.15 mmol) and solvent (2.0 mL) under a nitrogen atmosphere at room temperature for 72 h. <sup>b</sup> The reactions was carried out with **1a** (0.1 mmol) and **2a** (0.15 mmol), DIPEA (0.2 mmol) and ArCHO (0.15 mol) and MeOH (2.0 mL) at room temperature for 24 h. <sup>c</sup> 60 h. <sup>d</sup> 10 equiv. of MeOH was used additionally. <sup>e</sup> 0°C. <sup>f</sup> 50°C.

**Table S2 Condition optimization for isatin-derived ketamine with nitrobenzyl bromide<sup>a,b</sup>**

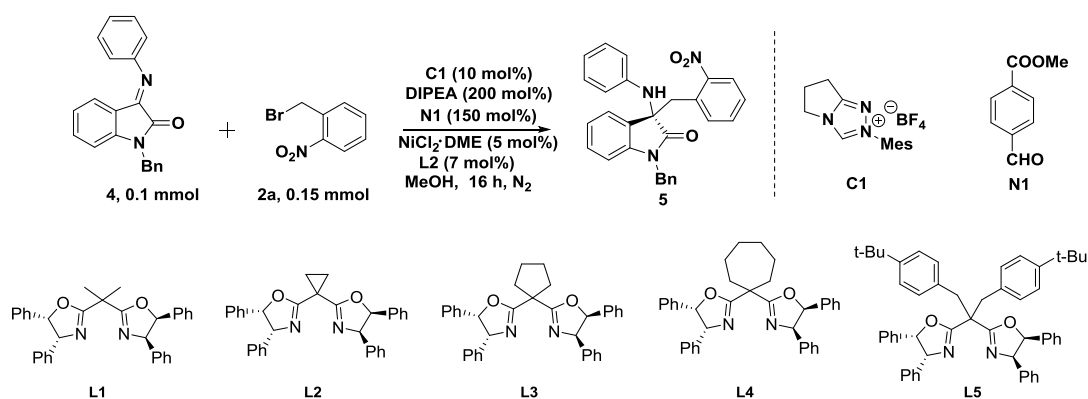

| Entry | Cat (5%)                | Ligand (7%) | Base  | Solvent | Yield (%) | ee (%) |
|-------|-------------------------|-------------|-------|---------|-----------|--------|
| 1     | NiCl <sub>2</sub> ·DME  | <b>L1</b>   | DIPEA | MeOH    | 55        | 5      |
| 2     | NiCl <sub>2</sub> ·DME  | <b>L2</b>   | DIPEA | MeOH    | 70        | 82     |
| 3     | NiCl <sub>2</sub> ·DME  | <b>L3</b>   | DIPEA | MeOH    | 56        | 70     |
| 4     | NiCl <sub>2</sub> ·DME  | <b>L4</b>   | DIPEA | MeOH    | 35        | 41     |
| 5     | NiCl <sub>2</sub> ·DME  | <b>L5</b>   | DIPEA | MeOH    | 43        | 4      |
| 6     | NiCl <sub>2</sub> ·DPPP | <b>L2</b>   | DIPEA | MeOH    | 54        | 72     |
| 7     | NiCl <sub>2</sub>       | <b>L2</b>   | DIPEA | MeOH    | 60        | 56     |
| 8     | Ni(acac) <sub>2</sub>   | <b>L2</b>   | DIPEA | MeOH    | 57        | 0      |
| 9     | Ni(OTf) <sub>2</sub>    | <b>L2</b>   | DIPEA | MeOH    | 55        | 54     |

<sup>a</sup> Reaction conditions: **4a** (0.1 mmol), **2a** (0.15 mmol), ArCHO (0.15 mmol), DIPEA (0.2 mmol), **C1** (0.01 mmol), **L2** (0.007 mmol), NiCl<sub>2</sub>·DME (0.005 mmol), MeOH (2 mL) under a nitrogen atmosphere at room temperature for 16 h. <sup>b</sup> Isolated yield.

### 3. General Procedure for the Synthesis of 3 and 5

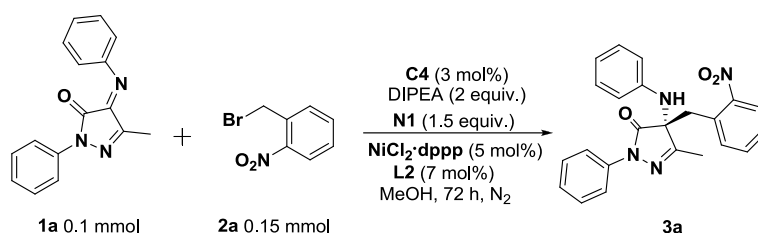

In a dry and nitrogen filled tube, a mixture of NiCl<sub>2</sub>·dppp (0.005 mmol), **L2** (0.007 mmol) in MeOH (1 mL) was stirred at room temperature under nitrogen for 30 mins. Pyrazolone-derived ketimine **1a** (0.1 mmol), nitrobenzyl bromide **2a** (0.15 mmol), aldehyde **N1** (0.15 mmol), **C4** (0.003 mmol) and DIPEA (0.2 mmol) were added to the above catalyst solution under nitrogen. The reaction mixture was stirred at room temperature for 72 h, then the resulting mixture was concentrated under reduced pressure, and the residue was purified via column chromatography on silica gel to afford product **3a**.

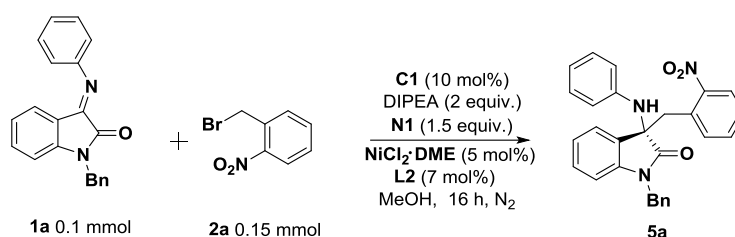

In a dry and nitrogen filled tube, a mixture of NiCl<sub>2</sub>·DME (0.005 mmol), **L2** (0.007 mmol) in MeOH (2 mL) was stirred at room temperature under nitrogen for 30 mins. Isatin-derived ketimine **1a** (0.1 mmol), nitrobenzyl bromide **2a** (0.15 mmol), aldehyde **N1** (0.15 mmol), **C1** (0.01 mmol) and DIPEA (0.2 mmol) were added to the above catalyst solution under nitrogen. The reaction mixture was stirred at room temperature for 16 h. then the resulting mixture was concentrated under reduced pressure, and the residue was purified *via* column chromatography on silica gel to afford product **5a**.

## 4. Synthetic Transformations

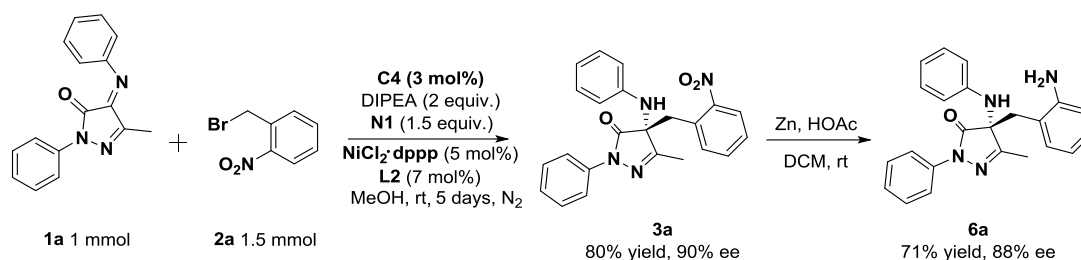

In a dry and nitrogen filled tube, a mixture of  $\text{NiCl}_2 \cdot \text{dppp}$  (0.05 mmol), **L2** (0.07 mmol) in MeOH (5 mL) was stirred at room temperature under nitrogen for 30 mins. Pyrazolone-derived ketimine **1a** (1 mmol), nitrobenzyl bromide **2a** (1.5 mmol), aldehyde **N1** (1.5 mmol) and **C4** (0.1 mmol) in MeOH (5 mL) were added sequentially. Finally, DIPEA (2 mmol) were added to the above solution through a syringe, then the reaction mixture was stirred at room temperature for 5 days, the resulting mixture was concentrated under reduced pressure, and the residue was purified via column chromatography on silica gel to afford product **3a** (320 mg, 80% yield, 90% ee).

To a stirred solution of compound **3a** (0.17 mmol) in  $\text{CH}_2\text{Cl}_2$  (5 mL) was added Zn powder (3.4 mmol), followed by the addition of HOAc (1 mL). The resulting mixture was allowed to stir at room temperature after the reaction was completed (determined by TLC analysis). The solvent of the filtrate was poured into water and extracted with  $\text{CH}_2\text{Cl}_2$ . The combined organic phases were dried over anhydrous  $\text{Na}_2\text{SO}_4$  and solvents were removed under reduced pressure. The residue was purified via column chromatography on silica gel to afford product **6a** (26.3 mg, 71% yield, 88% ee).

## 5. Characterization of Compounds

(*R*)-5-Methyl-4-(2-nitrobenzyl)-2-phenyl-4-(phenylamino)-2,4-dihydro-3*H*-pyrazol-3-one (**3a**)

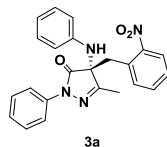

Yellow solid, 30.8 mg, 77% yield, 90% ee, m.p. 144-146 °C,  $[\alpha]_{\text{D}}^{20} = 225.1$  ( $c = 0.26$ ,  $\text{CHCl}_3$ ). **<sup>1</sup>H NMR** (400 MHz,  $\text{CDCl}_3$ )  $\delta$ : 7.91 (d,  $J = 8.0$  Hz, 1H), 7.67 (dd,  $J = 8.7, 1.2$  Hz, 2H), 7.46-7.34 (m, 5H), 7.18 (t,  $J = 7.4$  Hz, 1H), 7.08 (dd,  $J = 8.6, 7.3$  Hz, 2H), 6.75 (t,  $J = 7.4$  Hz, 1H), 6.36 (d,  $J = 7.8$  Hz, 2H), 4.64 (brs, 1H), 3.96 (d,  $J = 13.2$  Hz, 1H), 3.48 (d,  $J = 13.3$  Hz, 1H), 2.05 (s, 3H) ppm; **<sup>13</sup>C NMR** (101 MHz,  $\text{CDCl}_3$ )  $\delta$ : 172.4, 162.4, 150.1, 144.2, 137.5, 133.8, 132.8, 129.6, 129.6, 129.2, 128.9, 128.9, 126.6, 125.5, 125.2, 120.0, 119.0, 119.0, 114.0, 113.9, 69.4, 38.3, 13.6 ppm; **HRMS** (ESI-TOF)  $m/z$  calcd. for  $\text{C}_{23}\text{H}_{21}\text{N}_4\text{O}_3$   $[\text{M}+\text{H}]^+$ : 401.1608, found: 401.1599; **HPLC analysis**: The enantiomeric excess was determined by HPLC with a Chiralpak IC column (*n*-hexane/*i*-PrOH = 80/20, 1.0 mL/min, 245 nm):  $t_{\text{major}} = 9.1$  min,  $t_{\text{minor}} = 6.6$  min.

(*R*)-4-((4-Methoxyphenyl)amino)-5-methyl-4-(2-nitrobenzyl)-2-phenyl-2,4-dihydro-3*H*-pyrazol-3-one (**3b**)

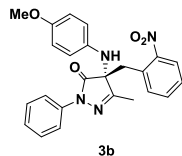

Light yellow oil, 30.1 mg, 70% yield, 83% ee,  $[\alpha]_{\text{D}}^{20} = 173.3$  ( $c = 0.44$ ,  $\text{CHCl}_3$ ). **<sup>1</sup>H NMR** (400 MHz,  $\text{CDCl}_3$ )  $\delta$ : 7.92 (dd,  $J = 8.0, 1.5$  Hz, 1H), 7.67-7.64 (m, 2H), 7.47-7.32 (m, 5H), 7.17 (t,  $J = 7.4$  Hz, 1H), 6.67-6.64 (m, 2H), 6.41-6.37 (m, 2H), 4.27 (brs, 1H), 3.93 (d,  $J = 13.4$  Hz, 1H), 3.66 (s, 3H), 3.46 (d,  $J = 13.4$  Hz, 1H), 2.05 (s, 3H) ppm; **<sup>13</sup>C NMR** (101 MHz,  $\text{CDCl}_3$ )  $\delta$ : 172.8, 162.3, 154.0, 150.1, 137.8, 137.5, 133.7, 132.8, 129.1, 128.8, 128.8,

126.9, 125.4, 125.2, 118.9, 118.9, 116.6, 116.6, 114.9, 114.9, 70.1, 55.5, 38.1, 13.7 ppm; **HRMS** (ESI-TOF)  $m/z$  calcd. for  $C_{24}H_{23}N_4O_4$   $[M+H]^+$ : 431.1714, found: 431.1730; **HPLC analysis**: The enantiomeric excess was determined by HPLC with a Chiralpak IC column (*n*-hexane/*i*-PrOH = 80/20, 1.0 mL/min, 245 nm):  $t_{major}$  = 17.7 min,  $t_{minor}$  = 11.0 min.

(*R*)-5-Methyl-4-(2-nitrobenzyl)-2-phenyl-4-(*p*-tolylamino)-2,4-dihydro-3*H*-pyrazol-3-one (**3c**)

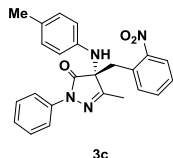

Light yellow oil, 26.5 mg, 64% yield, 88% ee,  $[\alpha]_D^{20}$  = 188.0 ( $c$  = 0.26,  $CHCl_3$ ).  **$^1H$  NMR** (400 MHz,  $CDCl_3$ )  $\delta$ : 7.92 (d,  $J$  = 7.8 Hz, 1H), 7.64 (d,  $J$  = 7.6 Hz, 2H), 7.48-7.30 (m, 5H), 7.17 (t,  $J$  = 7.4 Hz, 1H), 6.88 (d,  $J$  = 8.3 Hz, 2H), 6.29 (d,  $J$  = 8.5 Hz, 2H), 4.41 (brs, 1H), 3.96 (d,  $J$  = 13.3 Hz, 1H), 3.46 (d,  $J$  = 13.2 Hz, 1H), 2.16 (s, 3H), 2.05 (s, 3H) ppm;  **$^{13}C$  NMR** (101 MHz,  $CDCl_3$ )  $\delta$ : 172.2, 162.2, 150.2, 144.2, 135.3, 135.1, 133.8, 132.8, 129.6, 129.6, 129.4, 129.4, 129.2, 126.6, 125.2, 119.9, 119.1, 119.1, 113.9, 113.9, 69.3, 38.2, 21.0, 13.6 ppm; **HRMS** (ESI-TOF)  $m/z$  calcd. for  $C_{24}H_{23}N_4O_3$   $[M+H]^+$ : 415.1765, found: 415.1776; **HPLC analysis**: The enantiomeric excess was determined by HPLC with a Chiralpak IC column (*n*-hexane/*i*-PrOH = 80/20, 1.0 mL/min, 245 nm):  $t_{major}$  = 12.9 min,  $t_{minor}$  = 8.4 min.

(*R*)-4-((4-Fluorophenyl)amino)-5-methyl-4-(2-nitrobenzyl)-2-phenyl-2,4-dihydro-3*H*-pyrazol-3-one (**3d**)

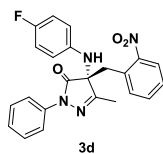

Yellow solid, 28.0 mg, 67% yield, 80% ee, m.p. 143-145 °C,  $[\alpha]_D^{20}$  = 186.1 ( $c$  = 0.34,  $CHCl_3$ ).  **$^1H$  NMR** (400 MHz,  $CDCl_3$ )  $\delta$ : 7.94-7.92 (m, 1H), 7.66 (d,  $J$  = 8.1 Hz, 2H), 7.48-7.34 (m, 5H), 7.18 (t,  $J$  = 7.4 Hz, 1H), 6.79 (t,  $J$  = 8.7 Hz, 2H), 6.33 (dd,  $J$  = 8.9, 4.3 Hz, 2H), 4.51 (brs, 1H), 3.92 (d,  $J$  = 13.3 Hz, 1H), 3.48 (d,  $J$  = 13.4 Hz, 1H), 2.05 (s, 3H) ppm;  **$^{13}C$  NMR** (126 MHz,  $CDCl_3$ )  $\delta$ : 172.3, 162.1, 158.2, 156.3, 150.2, 140.4, 137.4, 133.8, 132.8, 129.3, 128.9, 128.9, 126.6, 125.6, 125.3, 118.9, 118.9, 116.2, 116.1, 115.7, 69.7, 38.2, 13.6 ppm;  **$^{19}F$  NMR** (376 MHz,  $CDCl_3$ )  $\delta$ : -124.18 ppm; **HRMS** (ESI-TOF)  $m/z$  calcd. for  $C_{23}H_{20}FN_4O_3$   $[M+H]^+$ : 450.1812, found: 450.1792; **HPLC analysis**: The enantiomeric excess was determined by HPLC with a Chiralpak IC column (*n*-hexane/*i*-PrOH = 80/20, 1.0 mL/min, 245 nm):  $t_{major}$  = 7.5 min,  $t_{minor}$  = 5.3 min.

(*R*)-2-(4-Methoxyphenyl)-5-methyl-4-(2-nitrobenzyl)-4-(phenylamino)-2,4-dihydro-3*H*-pyrazol-3-one (**3e**)

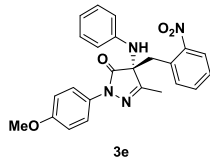

Yellow solid, 27.1 mg, 63% yield, 88% ee, m.p. 104-106 °C,  $[\alpha]_D^{20}$  = 211.9 ( $c$  = 0.31,  $CHCl_3$ ).  **$^1H$  NMR** (400 MHz,  $CDCl_3$ )  $\delta$ : 7.92 (d,  $J$  = 7.9 Hz, 1H), 7.52-7.38 (m, 5H), 7.09 (t,  $J$  = 7.8 Hz, 2H), 6.88 (d,  $J$  = 9.0 Hz, 2H), 6.76 (t,  $J$  = 7.4 Hz, 1H), 6.36 (d,  $J$  = 8.0 Hz, 2H), 4.55 (brs, 1H), 3.97 (d,  $J$  = 13.2 Hz, 1H), 3.81 (s, 3H), 3.47 (d,  $J$  = 13.2 Hz, 1H), 2.04 (s, 3H) ppm;  **$^{13}C$  NMR** (101MHz,  $CDCl_3$ )  $\delta$ : 172.0, 162.2, 157.4, 150.2, 144.2, 133.8, 132.8, 130.8, 129.6, 129.6, 129.2, 126.6, 125.2, 120.9, 120.9, 119.9, 114.0, 114.0, 113.9, 113.9, 69.3, 55.5, 38.2, 13.6 ppm; **HRMS** (ESI-TOF)  $m/z$  calcd. for  $C_{24}H_{23}N_4O_4$   $[M+H]^+$ : 431.1714, found: 431.1712; **HPLC analysis**: The enantiomeric excess was determined by HPLC with a Chiralpak IC column (*n*-hexane/*i*-PrOH = 80/20, 1.0 mL/min, 245 nm):  $t_{major}$  = 14.3 min,  $t_{minor}$  = 9.1 min.

(*R*)-5-Methyl-4-(2-nitrobenzyl)-4-(phenylamino)-2-(*p*-tolyl)-2,4-dihydro-3*H*-pyrazol-3-one (**3f**)

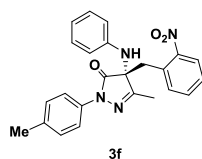

Light yellow oil, 31.5 mg, 76% yield, 90% ee,  $[\alpha]_D^{20} = 225.7$  ( $c = 0.25$ ,  $\text{CHCl}_3$ ). **<sup>1</sup>H NMR** (400 MHz,  $\text{CDCl}_3$ )  $\delta$ : 7.92 (d,  $J = 7.9$  Hz, 1H), 7.52 (d,  $J = 8.3$  Hz, 2H), 7.47-7.38 (m, 3H), 7.16 (d,  $J = 8.1$  Hz, 2H), 7.08 (t,  $J = 7.9$  Hz, 2H), 6.75 (t,  $J = 7.4$  Hz, 1H), 6.36 (d,  $J = 7.8$  Hz, 2H), 4.57 (brs, 1H), 3.95 (d,  $J = 13.2$  Hz, 1H), 3.48 (d,  $J = 13.2$  Hz, 1H), 2.34 (s, 3H), 2.04 (s, 3H) ppm; **<sup>13</sup>C NMR** (101MHz,  $\text{CDCl}_3$ )  $\delta$ : 172.6, 162.5, 150.1, 141.8, 137.5, 133.8, 132.7, 130.0, 130.1, 129.5, 129.2, 128.8, 128.8, 126.7, 125.4, 125.2, 119.0, 119.0, 114.3, 114.3, 69.7, 38.3, 20.4, 13.7 ppm; **HRMS** (ESI-TOF)  $m/z$  calcd. for  $\text{C}_{24}\text{H}_{23}\text{N}_4\text{O}_3$   $[\text{M}+\text{H}]^+$ : 415.1772, found: 415.1765; **HPLC analysis**: The enantiomeric excess was determined by HPLC with a Chiralpak IC column (*n*-hexane/*i*-PrOH = 80/20, 1.0 mL/min, 245 nm):  $t_{\text{major}} = 10.6$  min,  $t_{\text{minor}} = 7.0$  min.

(*R*)-2-(4-Bromophenyl)-5-methyl-4-(2-nitrobenzyl)-4-(phenylamino)-2,4-dihydro-3*H*-pyrazol-3-one (**3g**)

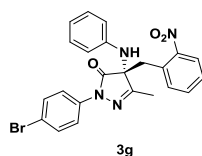

Light yellow oil, 26.8 mg, 56% yield, 86% ee,  $[\alpha]_D^{20} = 192.2$  ( $c = 0.41$ ,  $\text{CHCl}_3$ ). **<sup>1</sup>H NMR** (400 MHz,  $\text{CDCl}_3$ )  $\delta$ : 7.93 (d,  $J = 7.7$  Hz, 1H), 7.62-7.59 (m, 2H), 7.47-7.37 (m, 5H), 7.08 (t,  $J = 7.5$  Hz, 2H), 6.76 (t,  $J = 7.4$  Hz, 1H), 6.33 (d,  $J = 8.0$  Hz, 2H), 4.55 (brs, 1H), 3.97 (d,  $J = 13.0$  Hz, 1H), 3.47 (d,  $J = 13.1$  Hz, 1H), 2.06 (s, 3H) ppm; **<sup>13</sup>C NMR** (101MHz,  $\text{CDCl}_3$ )  $\delta$ : 172.4, 162.8, 150.1, 144.1, 136.5, 133.7, 132.8, 131.9, 131.9, 129.6, 129.6, 129.4, 126.4, 125.3, 120.1, 120.1, 120.1, 118.3, 113.9, 113.9, 69.4, 38.4, 13.6 ppm; **HRMS** (ESI-TOF)  $m/z$  calcd. for  $\text{C}_{23}\text{H}_{20}\text{N}_4\text{O}_3\text{Br}$   $[\text{M}+\text{H}]^+$ : 479.0713, found: 479.0713; **HPLC analysis**: The enantiomeric excess was determined by HPLC with a Chiralpak IC column (*n*-hexane/*i*-PrOH = 80/20, 1.0 mL/min, 245 nm):  $t_{\text{major}} = 7.8$  min,  $t_{\text{minor}} = 5.9$  min.

(*R*)-2-(3-Chlorophenyl)-5-methyl-4-(2-nitrobenzyl)-4-(phenylamino)-2,4-dihydro-3*H*-pyrazol-3-one (**3h**)

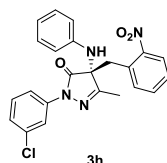

Light yellow oil, 30.5 mg, 70% yield, 86% ee,  $[\alpha]_D^{20} = 210.4$  ( $c = 0.36$ ,  $\text{CHCl}_3$ ). **<sup>1</sup>H NMR** (400 MHz,  $\text{CDCl}_3$ )  $\delta$ : 7.94-7.92 (m, 1H), 7.73-7.64 (m, 2H), 7.54-7.37 (m, 3H), 7.29-7.25 (m, 1H), 7.16-7.06 (m, 3H), 6.76 (t,  $J = 7.4$  Hz, 1H), 6.34-6.32 (m, 2H), 4.57 (brs, 1H), 3.96 (d,  $J = 13.3$  Hz, 1H), 3.47 (d,  $J = 13.3$  Hz, 1H), 2.06 (s, 3H) ppm; **<sup>13</sup>C NMR** (126 MHz,  $\text{CDCl}_3$ )  $\delta$ : 172.5, 162.9, 150.1, 144.0, 138.5, 134.6, 133.7, 132.8, 129.9, 129.7, 129.7, 129.3, 126.4, 125.2, 125.3, 120.2, 118.6, 116.5, 113.9, 113.9, 69.5, 38.4, 13.6 ppm; **HRMS** (ESI-TOF)  $m/z$  calcd. for  $\text{C}_{23}\text{H}_{20}\text{ClN}_4\text{O}_3$   $[\text{M}+\text{H}]^+$ : 435.1218, found: 435.1227; **HPLC analysis**: The enantiomeric excess was determined by HPLC with a Chiralpak IC column (*n*-hexane/*i*-PrOH = 80/20, 1.0 mL/min, 245 nm):  $t_{\text{major}} = 8.0$  min,  $t_{\text{minor}} = 5.4$  min.

(*R*)-2-(4-Fluorophenyl)-5-methyl-4-(2-nitrobenzyl)-4-(phenylamino)-2,4-dihydro-3*H*-pyrazol-3-one (**3i**)



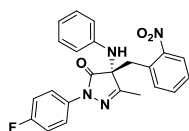

3i

Light yellow oil, 28.0 mg, 67% yield, 70% ee,  $[\alpha]_D^{20} = 156.39$  ( $c = 0.21$ ,  $\text{CHCl}_3$ ).  **$^1\text{H NMR}$**  (400 MHz,  $\text{CDCl}_3$ )  $\delta$ : 7.94-7.91 (m, 1H), 7.64-7.61 (m, 2H), 7.48-7.37 (m, 3H), 7.10-7.01 (m, 4H), 6.76 (t,  $J = 7.3$  Hz, 1H), 6.34 (d,  $J = 8.4$  Hz, 2H), 4.55 (brs, 1H), 3.98 (d,  $J = 13.1$  Hz, 1H), 3.47 (d,  $J = 13.2$  Hz, 1H), 2.05 (s, 3H) ppm;  **$^{13}\text{C NMR}$**  (101 MHz,  $\text{CDCl}_3$ )  $\delta$ : 172.2, 162.6, 161.3, 158.9, 150.1, 144.1, 133.8, 133.6, 132.8, 129.6, 129.6, 129.3, 126.5, 125.2, 120.7, 120.1, 115.7, 115.5, 113.9, 113.9, 69.3, 38.3, 13.6 ppm;  **$^{19}\text{F NMR}$**  (376 MHz,  $\text{CDCl}_3$ )  $\delta$ : -116.52 ppm; **HRMS** (ESI-TOF)  $m/z$  calcd. for  $\text{C}_{23}\text{H}_{20}\text{N}_4\text{O}_3\text{F}$   $[\text{M}+\text{H}]^+$ : 419.1506, found: 419.1514; **HPLC analysis**: The enantiomeric excess was determined by HPLC with a Chiralpak IC column ( $n$ -hexane/ $i$ -PrOH = 80/20, 1.0 mL/min, 245 nm):  $t_{\text{major}} = 8.1$  min,  $t_{\text{minor}} = 5.9$  min.

(*R*)-5-Ethyl-4-(2-nitrobenzyl)-2-phenyl-4-(phenylamino)-2,4-dihydro-3*H*-pyrazol-3-one (**3j**)

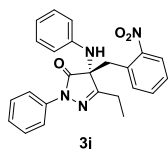

3j

Yellow solid, 25.2 mg, 61% yield, 86% ee, m.p. 143-145 °C,  $[\alpha]_D^{20} = 210.7$  ( $c = 0.26$ ,  $\text{CHCl}_3$ ).  **$^1\text{H NMR}$**  (400 MHz,  $\text{CDCl}_3$ )  $\delta$ : 7.93 (d,  $J = 7.9$  Hz, 1H), 7.73 (d,  $J = 8.3$  Hz, 2H), 7.48-7.35 (m, 5H), 7.19 (t,  $J = 7.4$  Hz, 1H), 7.08 (t,  $J = 7.7$  Hz, 2H), 6.74 (t,  $J = 7.4$  Hz, 1H), 6.34 (d,  $J = 8.0$  Hz, 2H), 4.61 (brs, 1H), 3.92 (d,  $J = 13.3$  Hz, 1H), 3.51 (d,  $J = 13.4$  Hz, 1H), 2.48-2.28 (m, 2H), 1.19 (t,  $J = 7.4$  Hz, 3H) ppm;  **$^{13}\text{C NMR}$**  (101 MHz,  $\text{CDCl}_3$ )  $\delta$ : 172.6, 166.1, 150.1, 144.3, 137.7, 133.9, 132.8, 129.5, 129.5, 129.2, 128.8, 128.8, 126.7, 125.4, 125.3, 119.8, 119.0, 119.0, 113.9, 113.9, 69.3, 38.4, 21.2, 9.0 ppm; **HRMS** (ESI-TOF)  $m/z$  calcd. for  $\text{C}_{24}\text{H}_{23}\text{N}_4\text{O}_3$   $[\text{M}+\text{H}]^+$ : 415.1765, found: 415.1764; **HPLC analysis**: The enantiomeric excess was determined by HPLC with a Chiralpak IC column ( $n$ -hexane/ $i$ -PrOH = 80/20, 1.0 mL/min, 245 nm):  $t_{\text{major}} = 9.3$  min,  $t_{\text{minor}} = 6.3$  min.

(*R*)-5-Isopropyl-4-(2-nitrobenzyl)-2-phenyl-4-(phenylamino)-2,4-dihydro-3*H*-pyrazol-3-one (**3k**)

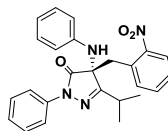

3k

Yellow solid, 28.2 mg, 66% yield, 94% ee, m.p. 133-135 °C,  $[\alpha]_D^{20} = 151.4$  ( $c = 0.19$ ,  $\text{CHCl}_3$ ).  **$^1\text{H NMR}$**  (400 MHz,  $\text{CDCl}_3$ )  $\delta$ : 8.01 (dd,  $J = 8.1, 1.5$  Hz, 1H), 7.86-7.84 (m, 2H), 7.55-7.39 (m, 5H), 7.24-7.20 (m, 1H), 7.04 (dd,  $J = 8.6, 7.4$  Hz, 2H), 6.70 (t,  $J = 7.4$  Hz, 1H), 6.28 (d,  $J = 7.7$  Hz, 2H), 4.82 (brs, 1H), 3.68 (s, 2H), 2.79 (m,  $J = 6.8$  Hz, 1H), 1.30 (d,  $J = 6.8$  Hz, 3H), 1.09 (d,  $J = 6.9$  Hz, 3H) ppm;  **$^{13}\text{C NMR}$**  (126 MHz,  $\text{CDCl}_3$ )  $\delta$ : 172.1, 169.3, 150.2, 144.6, 138.0, 133.9, 132.9, 129.3, 129.3, 129.2, 128.9, 128.9, 127.0, 125.5, 125.4, 119.6, 119.0, 119.0, 114.0, 114.0, 68.8, 38.1, 28.1, 21.4, 20.7 ppm; **HRMS** (ESI-TOF)  $m/z$  calcd. for  $\text{C}_{25}\text{H}_{25}\text{N}_4\text{O}_3$   $[\text{M}+\text{H}]^+$ : 429.1921, found: 429.1911; **HPLC analysis**: The enantiomeric excess was determined by HPLC with a Chiralpak IC column ( $n$ -hexane/ $i$ -PrOH = 80/20, 1.0 mL/min, 245 nm):  $t_{\text{major}} = 11.2$  min,  $t_{\text{minor}} = 6.2$  min.

(*R*)-5-Methyl-4-(4-nitrobenzyl)-2-phenyl-4-(phenylamino)-2,4-dihydro-3*H*-pyrazol-3-one (**3l**)

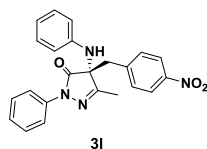

Yellow solid, 20.0 mg, 50% yield, 94% ee, m.p. 163-166 °C,  $[\alpha]_D^{20} = 26.75$  (c = 0.16, CHCl<sub>3</sub>). **<sup>1</sup>H NMR** (400 MHz, CDCl<sub>3</sub>) δ: 8.06 (d, *J* = 8.3 Hz, 1H), 7.53-7.51(m, 2H), 7.34-7.30 (m, 4H), 7.19-7.09 (m, 3H), 6.80 (t, *J* = 7.3 Hz, 1H), 6.43 (d, *J* = 8.3 Hz, 2H), 4.38 (brs, 1H), 3.39 (d, *J* = 12.3 Hz, 1H), 3.25 (d, *J* = 12.2 Hz, 1H), 2.20 (s, 3H) ppm; **<sup>13</sup>C NMR** (101 MHz, CDCl<sub>3</sub>) δ: 172.2, 161.2, 147.7, 144.2, 138.9, 137.1, 130.8, 130.8, 129.7, 129.7, 128.9, 128.9, 125.8, 123.5, 123.5, 120.3, 119.0, 119.0, 113.9, 113.9, 70.0, 42.6, 14.0 ppm; **HRMS** (ESI-TOF) *m/z* calcd. for C<sub>23</sub>H<sub>21</sub>N<sub>4</sub>O<sub>3</sub> [M+H]<sup>+</sup>: 401.1599, found: 401.1608; **HPLC analysis**: The enantiomeric excess was determined by HPLC with a Chiralpak IC column (*n*-hexane/*i*-PrOH = 95/5, 0.8 mL/min, 254 nm): *t*<sub>major</sub> = 26.9 min, *t*<sub>minor</sub> = 10.2 min.

(*R*)-4-(2-Chloro-4-nitrobenzyl)-5-methyl-2-phenyl-4-(phenylamino)-2,4-dihydro-3*H*-pyrazol-3-one (**3m**)

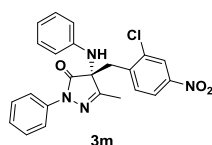

Yellow solid, 17.8 mg, 41% yield, 94% ee, m.p. 110-114 °C,  $[\alpha]_D^{20} = 43.56$  (c = 0.29, CHCl<sub>3</sub>). **<sup>1</sup>H NMR** (400 MHz, CDCl<sub>3</sub>) δ: 8.27 (d, *J* = 2.3 Hz, 1H), 7.92 (dd, *J* = 8.6, 2.4 Hz, 1H), 7.72-7.69 (m, 2H), 7.47 (d, *J* = 8.5 Hz, 1H), 7.38 (t, *J* = 8.0 Hz, 2H), 7.21 (t, *J* = 7.4 Hz, 1H), 7.12 (dd, *J* = 8.6, 7.3 Hz, 1H), 6.80 (t, *J* = 7.4 Hz, 1H), 6.41 (d, *J* = 7.8 Hz, 2H), 4.47 (brs, 1H), 3.60 (d, *J* = 13.1 Hz, 1H), 3.46 (d, *J* = 13.1 Hz, 1H), 2.19 (s, 3H) ppm; **<sup>13</sup>C NMR** (126 MHz, CDCl<sub>3</sub>) δ: 172.2, 162.2, 147.8, 144.4, 137.4, 137.3, 135.7, 132.9, 129.7, 129.7, 129.0, 129.0, 125.8, 124.9, 121.5, 120.3, 118.8, 118.8, 114.0, 114.0, 69.4, 39.1, 14.5 ppm; **HRMS** (ESI-TOF) *m/z* calcd. for C<sub>23</sub>H<sub>20</sub>N<sub>4</sub>O<sub>3</sub>Cl [M+H]<sup>+</sup>: 435.1218, found: 435.1230; **HPLC analysis**: The enantiomeric excess was determined by HPLC with a Chiralpak IC column (*n*-hexane/*i*-PrOH = 95/5, 0.8 mL/min, 254 nm): *t*<sub>major</sub> = 14.6 min, *t*<sub>minor</sub> = 17.9 min.

(*R*)-4-(2-Fluoro-4-nitrobenzyl)-5-methyl-2-phenyl-4-(phenylamino)-2,4-dihydro-3*H*-pyrazol-3-one (**3n**)

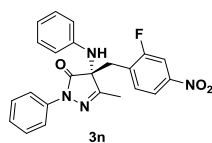

Light yellow oil, 28.0 mg, 67% yield, 92% ee,  $[\alpha]_D^{20} = 32.26$  (c = 0.40, CHCl<sub>3</sub>). **<sup>1</sup>H NMR** (400 MHz, CDCl<sub>3</sub>) δ: 7.92 (dd, *J* = 9.6, 2.3 Hz, 1H), 7.81 (dd, *J* = 8.5, 2.3 Hz, 1H), 7.60 (d, *J* = 8.1 Hz, 2H), 7.41-7.32 (m, 3H), 7.18 (t, *J* = 7.4 Hz, 1H), 7.12 (t, *J* = 7.8 Hz, 2H), 6.80 (t, *J* = 7.4 Hz, 1H), 6.42 (d, *J* = 8.0 Hz, 2H), 4.47 (brs, 1H), 3.51 (d, *J* = 12.6 Hz, 1H), 3.27 (d, *J* = 12.7 Hz, 1H), 2.17 (s, 3H) ppm; **<sup>13</sup>C NMR** (101 MHz, CDCl<sub>3</sub>) δ: 172.1, 162.1, 160.8 (d, *J* = 250.6 Hz), 148.5, 144.0, 137.2, 133.1 (d, *J* = 4.1 Hz), 129.7, 129.7, 129.0, 129.0, 126.7 (d, *J* = 16.0 Hz), 125.8, 120.3, 119.0 (d, *J* = 3.7 Hz), 118.9, 118.9, 113.9, 113.9, 111.3 (d, *J* = 28.3 Hz), 69.6, 35.6, 13.7 ppm; **<sup>19</sup>F NMR** (376 MHz, CDCl<sub>3</sub>) δ: -110.94 ppm; **HRMS** (ESI-TOF) *m/z* calcd. for C<sub>23</sub>H<sub>20</sub>FN<sub>4</sub>O<sub>3</sub> [M+H]<sup>+</sup>: 419.1514, found: 419.1514; **HPLC analysis**: The enantiomeric excess was determined by HPLC with a Chiralpak IC column (*n*-hexane/*i*-PrOH = 80/20, 1.0 mL/min, 245 nm): *t*<sub>major</sub> = 17.9 min, *t*<sub>minor</sub> = 21.0 min.

(*R*)-5-Methyl-4-(3-nitrobenzyl)-2-phenyl-4-(phenylamino)-2,4-dihydro-3*H*-pyrazol-3-one (**3o**)

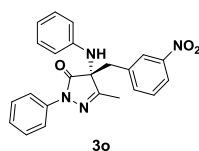

Light yellow oil, 11.2 mg, 28% yield, 0% ee. **<sup>1</sup>H NMR** (400 MHz, CDCl<sub>3</sub>) δ: 8.08-8.02 (m, 2H), 7.50 (dd, *J* = 20.8, 7.8 Hz, 3H), 7.33 (dt, *J* = 16.1, 8.1 Hz, 3H), 7.14 (dt, *J* = 15.7, 7.7 Hz, 3H), 6.79 (t, *J* = 7.4 Hz, 1H), 6.43 (d, *J* = 8.0 Hz, 2H), 4.39 (brs, 1H), 3.40 (d, *J* = 12.4 Hz, 1H), 3.26 (d, *J* = 12.4 Hz, 1H), 2.22 (s, 3H) ppm; **<sup>13</sup>C NMR** (101 MHz, CDCl<sub>3</sub>) δ: 172.2, 161.2, 147.9, 144.2, 137.1, 135.9, 133.5, 129.7, 129.7, 129.4, 128.9, 128.9, 125.7, 124.6, 123.2, 120.2, 118.9, 118.9, 113.9, 113.9, 70.0, 42.6, 14.1 ppm; **HRMS** (ESI-TOF) *m/z* calcd. for C<sub>23</sub>H<sub>21</sub>N<sub>4</sub>O<sub>3</sub> [M+H]<sup>+</sup>: 401.1608, found: 401.1624; **HPLC analysis**: The enantiomeric excess was determined by HPLC with a Chiralpak IC column (*n*-hexane/*i*-PrOH = 80/20, 1.0 mL/min, 245 nm): *t*<sub>major</sub> = 7.0 min, *t*<sub>minor</sub> = 8.8 min.

(*R*)-4-(3-Methoxy-2-nitrobenzyl)-5-methyl-2-phenyl-4-(phenylamino)-2,4-dihydro-3*H*-pyrazol-3-one (**3p**)

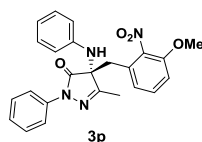

Yellow solid, 20.2 mg, 47% yield, 72% ee, m.p. 161-163 °C, [α]<sub>D</sub><sup>20</sup> = 1.80 (c = 0.33, CHCl<sub>3</sub>). **<sup>1</sup>H NMR** (500 MHz, CDCl<sub>3</sub>) δ: 7.89 (d, *J* = 8.1 Hz, 2H), 7.61 (d, *J* = 8.2 Hz, 1H), 7.45-7.39 (m, 3H), 7.19 (dd, *J* = 12.8, 7.7 Hz, 2H), 7.04 (t, *J* = 7.8 Hz, 2H), 6.68 (t, *J* = 7.3 Hz, 1H), 6.27 (d, *J* = 8.0 Hz, 2H), 5.62 (brs, 1H), 3.90 (s, 3H), 3.74 (d, *J* = 14.1 Hz, 1H), 3.61 (d, *J* = 14.1 Hz, 1H), 2.05 (s, 3H) ppm; **<sup>13</sup>C NMR** (126 MHz, CDCl<sub>3</sub>) δ: 171.9, 162.8, 158.6, 151.2, 144.6, 138.3, 129.5, 129.5, 129.3, 128.9, 128.9, 125.1, 119.1, 118.8, 118.8, 117.8, 117.3, 115.1, 113.4, 113.4, 68.7, 56.5, 31.4, 13.8 ppm; **HRMS** (ESI-TOF) *m/z* calcd. for C<sub>24</sub>H<sub>23</sub>N<sub>4</sub>O<sub>4</sub> [M+H]<sup>+</sup>: 431.1714, found: 431.1701; **HPLC analysis**: The enantiomeric excess was determined by HPLC with a Chiralpak IC column (*n*-hexane/*i*-PrOH = 80/20, 1.0 mL/min, 254 nm): *t*<sub>major</sub> = 17.1 min, *t*<sub>minor</sub> = 10.0 min.

(*R*)-5-Methyl-4-((6-nitrobenzo[d][1,3]dioxol-5-yl)methyl)-2-phenyl-4-(phenylamino)-2,4-dihydro-3*H*-pyrazol-3-one (**3q**)

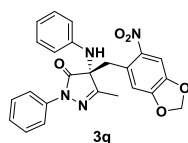

Light yellow oil, 39.9 mg, 83% yield, 90% ee, [α]<sub>D</sub><sup>20</sup> = 110.48 (c = 0.53, CHCl<sub>3</sub>). **<sup>1</sup>H NMR** (500 MHz, CDCl<sub>3</sub>) δ: 7.77 (d, *J* = 7.7 Hz, 2H), 7.45 (s, 1H), 7.39 (t, *J* = 8.0 Hz, 2H), 7.20 (t, *J* = 7.4 Hz, 1H), 7.08 (t, *J* = 8.0 Hz, 2H), 6.81 (s, 1H), 6.75 (t, *J* = 7.4 Hz, 1H), 6.35 (d, *J* = 7.9 Hz, 2H), 6.04 (d, *J* = 1.3 Hz, 1H), 5.92 (d, *J* = 1.3 Hz, 1H), 4.68 (brs, 1H), 3.85 (d, *J* = 13.4 Hz, 1H), 3.43 (d, *J* = 13.5 Hz, 1H), 2.05 (s, 3H) ppm; **<sup>13</sup>C NMR** (126 MHz, CDCl<sub>3</sub>) δ: 172.5, 162.6, 151.4, 147.9, 144.4, 144.1, 137.7, 129.6, 129.6, 128.9, 128.9, 125.4, 123.2, 119.9, 118.8, 118.8, 113.9, 113.9, 112.2, 106.1, 103.1, 69.3, 38.5, 13.6 ppm; **HRMS** (ESI-TOF) *m/z* calcd. for C<sub>24</sub>H<sub>21</sub>N<sub>4</sub>O<sub>5</sub> [M+H]<sup>+</sup>: 445.1506, found: 445.1520; **HPLC analysis**: The enantiomeric excess was determined by HPLC with a Chiralpak IC column (*n*-hexane/*i*-PrOH = 80/20, 1.0 mL/min, 254 nm): *t*<sub>major</sub> = 12.5 min, *t*<sub>minor</sub> = 9.4 min.

(*R*)-4-(5-Chloro-2-nitrobenzyl)-5-methyl-2-phenyl-4-(phenylamino)-2,4-dihydro-3*H*-pyrazol-3-one (**3r**)

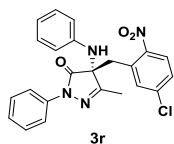

Yellow solid, 37.1 mg, 91% yield, 86% ee, m.p. 138-140 °C,  $[\alpha]_D^{20} = 138.99$  ( $c = 0.55$ ,  $\text{CHCl}_3$ ). **<sup>1</sup>H NMR** (500 MHz,  $\text{CDCl}_3$ )  $\delta$ : 7.89 (d,  $J = 8.7$  Hz, 1H), 7.71 (d,  $J = 8.2$  Hz, 2H), 7.42-7.33 (m, 4H), 7.20 (t,  $J = 7.4$  Hz, 1H), 7.08 (t,  $J = 7.7$  Hz, 2H), 6.76 (t,  $J = 7.3$  Hz, 1H), 6.36 (d,  $J = 8.2$  Hz, 2H), 4.54 (brs, 1H), 3.95 (d,  $J = 13.2$  Hz, 1H), 3.42 (d,  $J = 13.3$  Hz, 1H), 2.05 (s, 3H) ppm; **<sup>13</sup>C NMR** (126 MHz,  $\text{CDCl}_3$ )  $\delta$ : 172.2, 162.1, 148.3, 144.0, 139.3, 137.4, 133.6, 129.6, 129.6, 129.3, 128.9, 128.9, 128.7, 126.7, 125.6, 120.2, 118.8, 118.8, 114.1, 114.1, 69.2, 38.1, 13.6 ppm; **HRMS** (ESI-TOF)  $m/z$  calcd. for  $\text{C}_{23}\text{H}_{20}\text{ClN}_4\text{O}_3$   $[\text{M}+\text{H}]^+$ : 435.1218, found: 435.1212; **HPLC analysis**: The enantiomeric excess was determined by HPLC with a Chiralpak IC column ( $n$ -hexane/ $i$ -PrOH = 80/20, 1.0 mL/min, 254 nm):  $t_{\text{major}} = 7.1$  min,  $t_{\text{minor}} = 5.7$  min.

(*R*)-4-(4-Bromo-2-nitrobenzyl)-5-methyl-2-phenyl-4-(phenylamino)-2,4-dihydro-3*H*-pyrazol-3-one (**3s**)

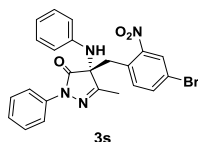

Light yellow oil, 39.8 mg, 83% yield, 90% ee,  $[\alpha]_D^{20} = 151.75$  ( $c = 0.65$ ,  $\text{CHCl}_3$ ). **<sup>1</sup>H NMR** (400 MHz,  $\text{CDCl}_3$ )  $\delta$ : 8.08 (d,  $J = 2.1$  Hz, 1H), 7.68-7.66 (m, 2H), 7.55 (dd,  $J = 8.3, 2.1$  Hz, 1H), 7.39 (dd,  $J = 8.6, 7.4$  Hz, 2H), 7.29-7.27 (m, 1H), 7.23-7.19 (m, 1H), 7.09 (dd,  $J = 8.6, 7.3$  Hz, 2H), 6.77 (t,  $J = 7.4$  Hz, 2H), 6.36 (dt,  $J = 7.7, 1.1$  Hz, 2H), 4.52 (brs, 1H), 3.86 (d,  $J = 13.3$  Hz, 1H), 3.43 (d,  $J = 13.4$  Hz, 1H), 2.06 (s, 3H) ppm; **<sup>13</sup>C NMR** (126 MHz,  $\text{CDCl}_3$ )  $\delta$ : 172.2, 162.2, 150.4, 144.0, 137.4, 135.8, 135.1, 129.6, 129.6, 128.9, 128.9, 128.1, 125.7, 125.5, 122.6, 120.2, 118.9, 118.9, 114.0, 114.0, 69.1, 37.8, 13.6 ppm; **HRMS** (ESI-TOF)  $m/z$  calcd. for  $\text{C}_{23}\text{H}_{20}\text{BrN}_4\text{O}_4$   $[\text{M}+\text{H}]^+$ : 431.1714, found: 431.1701; **HPLC analysis**: The enantiomeric excess was determined by HPLC with a Chiralpak IC column ( $n$ -hexane/ $i$ -PrOH = 80/20, 1.0 mL/min, 254 nm):  $t_{\text{major}} = 7.2$  min,  $t_{\text{minor}} = 5.8$  min.

(*R*)-4-(5-Fluoro-2-nitrobenzyl)-5-methyl-2-phenyl-4-(phenylamino)-2,4-dihydro-3*H*-pyrazol-3-one (**3t**)

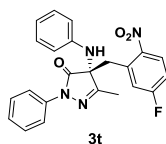

Light yellow oil, 28.8 mg, 69% yield, 84% ee,  $[\alpha]_D^{20} = 174.41$  ( $c = 0.11$ ,  $\text{CHCl}_3$ ). **<sup>1</sup>H NMR** (400 MHz,  $\text{CDCl}_3$ )  $\delta$ : 8.01 (dd,  $J = 9.1, 5.1$  Hz, 1H), 7.72 (d,  $J = 8.1$  Hz, 2H), 7.38 (t,  $J = 7.8$  Hz, 2H), 7.22-7.14 (m, 2H), 7.11-7.05 (m, 3H), 6.77 (t,  $J = 7.4$  Hz, 1H), 6.38 (d,  $J = 8.0$  Hz, 2H), 4.57 (brs, 1H), 3.94 (d,  $J = 13.3$  Hz, 1H), 3.49 (d,  $J = 13.3$  Hz, 1H), 2.07 (s, 3H) ppm; **<sup>13</sup>C NMR** (126 MHz,  $\text{CDCl}_3$ )  $\delta$ : 172.2, 164.0 (d,  $J = 258.4$  Hz), 162.2, 146.2, 144.0, 137.4, 130.3 (d,  $J = 9.1$  Hz), 129.6, 129.6, 129.9, 128.9, 128.0 (d,  $J = 9.8$  Hz), 125.6, 120.7 (d,  $J = 24.1$  Hz), 120.2, 118.8, 118.8, 116.2 (d,  $J = 22.9$  Hz), 114.1, 114.1, 69.1, 38.2, 13.6 ppm; **<sup>19</sup>F NMR** (376 MHz,  $\text{CDCl}_3$ )  $\delta$ : -103.01 ppm; **HRMS** (ESI-TOF)  $m/z$  calcd. for  $\text{C}_{23}\text{H}_{20}\text{FN}_4\text{O}_3$   $[\text{M}+\text{H}]^+$ : 419.1514, found: 419.1510; **HPLC analysis**: The enantiomeric excess was determined by HPLC with a Chiralpak IC column ( $n$ -hexane/ $i$ -PrOH = 80/20, 1.0 mL/min, 245 nm):  $t_{\text{major}} = 7.0$  min,  $t_{\text{minor}} = 5.5$  min.

(*R*)-4-(2-Fluoro-6-nitrobenzyl)-5-methyl-2-phenyl-4-(phenylamino)-2,4-dihydro-3*H*-pyrazol-3-one (**3u**)

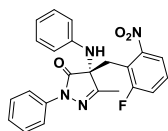

3u

Light yellow oil, 25.9 mg, 62% yield, 82% ee,  $[\alpha]_D^{20} = 11.84$  ( $c = 0.37$ ,  $\text{CHCl}_3$ ).  **$^1\text{H NMR}$**  (400 MHz,  $\text{CDCl}_3$ )  $\delta$ : 7.89 (d,  $J = 7.8$  Hz, 1H), 7.82 (d,  $J = 7.9$  Hz, 2H), 7.50-7.39 (m, 4H), 7.21 (t,  $J = 7.4$  Hz, 1H), 7.06 (t,  $J = 7.9$  Hz, 2H), 6.73 (t,  $J = 7.4$  Hz, 1H), 6.33 (d,  $J = 8.0$  Hz, 2H), 4.90 (brs, 1H), 3.80 (dd,  $J = 14.1, 2.1$  Hz, 1H), 3.70 (dd,  $J = 14.1, 2.4$  Hz, 1H), 2.10 (s, 3H) ppm;  **$^{13}\text{C NMR}$**  (126 MHz,  $\text{CDCl}_3$ )  $\delta$ : 171.5, 162.3, 161.7 (d,  $J = 247.8$  Hz), 150.5 (d,  $J = 4.3$  Hz), 144.2, 137.8, 129.8 (d,  $J = 10.0$  Hz), 129.5, 129.5, 128.9, 128.9, 125.4, 121.7 (d,  $J = 3.1$  Hz), 120.7 (d,  $J = 25.0$  Hz), 119.9, 119.0, 119.0, 116.5 (d,  $J = 19.1$  Hz), 114.0, 114.0, 68.2, 30.9, 13.6 ppm;  **$^{19}\text{F NMR}$**  (376 MHz,  $\text{CDCl}_3$ )  $\delta$ : -108.08 ppm; **HRMS** (ESI-TOF)  $m/z$  calcd. for  $\text{C}_{23}\text{H}_{20}\text{N}_4\text{O}_3\text{F}$   $[\text{M}+\text{H}]^+$ : 419.1514, found: 419.1508; **HPLC analysis**: The enantiomeric excess was determined by HPLC with a Chiralpak IC column ( $n$ -hexane/ $i$ -PrOH = 80/20, 1.0 mL/min, 245 nm):  $t_{\text{major}} = 16.5$  min,  $t_{\text{minor}} = 8.9$  min.

(*R*)-4-((3-Methyl-5-oxo-1-phenyl-4-(phenylamino)-4,5-dihydro-1H-pyrazol-4-yl)methyl)-3-nitrobenzonitrile (**3w**)

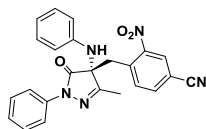

3v

Yellow solid, 19.1 mg, 45% yield, 76% ee, m.p. 118-120 °C,  $[\alpha]_D^{20} = 144.07$  ( $c = 0.21$ ,  $\text{CHCl}_3$ ).  **$^1\text{H NMR}$**  (500 MHz,  $\text{CDCl}_3$ )  $\delta$ : 8.21 (d,  $J = 1.7$  Hz, 1H), 7.66 (ddd,  $J = 19.5, 8.4, 1.5$  Hz, 3H), 7.56 (d,  $J = 8.1$  Hz, 1H), 7.38 (dd,  $J = 8.7, 7.4$  Hz, 2H), 7.21 (t,  $J = 7.4$  Hz, 1H), 7.10 (t,  $J = 7.9$  Hz, 2H), 6.79 (t,  $J = 7.4$  Hz, 1H), 6.36 (d,  $J = 7.9$  Hz, 2H), 4.49 (brs, 1H), 3.95 (d,  $J = 13.2$  Hz, 1H), 3.53 (d,  $J = 13.2$  Hz, 1H), 2.08 (s, 3H) ppm;  **$^{13}\text{C NMR}$**  (126 MHz,  $\text{CDCl}_3$ )  $\delta$ : 171.8, 162.0, 150.1, 143.7, 137.2, 135.3, 135.1, 131.8, 129.7, 129.7, 129.0, 129.0, 128.6, 125.9, 120.5, 118.7, 118.7, 116.0, 114.2, 114.2, 113.6, 69.3, 38.1, 13.6 ppm; **HRMS** (ESI-TOF)  $m/z$  calcd. for  $\text{C}_{24}\text{H}_{20}\text{N}_5\text{O}_3$   $[\text{M}+\text{H}]^+$ : 426.1561, found: 426.1562; **HPLC analysis**: The enantiomeric excess was determined by HPLC with a Chiralpak IC column ( $n$ -hexane/ $i$ -PrOH = 80/20, 1.0 mL/min, 254 nm):  $t_{\text{major}} = 22.1$  min,  $t_{\text{minor}} = 11.1$  min.

(*R*)-1-Benzyl-3-(2-nitrobenzyl)-3-(phenylamino)indolin-2-one (**5a**)

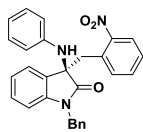

5a

Yellow oil, 31.5 mg, 70% yield, 82% ee,  $[\alpha]_D^{20} = 222.7$  ( $c = 0.36$ ,  $\text{CHCl}_3$ ).  **$^1\text{H NMR}$**  (400 MHz,  $\text{CDCl}_3$ )  $\delta$ : 7.73 (dd,  $J = 7.9, 1.5$  Hz, 1H), 7.41-7.28 (m, 3H), 7.24-7.20 (m, 3H), 7.17-7.10 (m, 2H), 7.03-6.90 (m, 5H), 6.71-6.68 (m, 1H), 6.55 (d,  $J = 7.8$  Hz, 1H), 6.23 (dd,  $J = 8.5, 0.9$  Hz, 2H), 4.96-4.93 (m, 1H), 4.60 (brs, 1H), 4.43 (d,  $J = 15.5$  Hz, 1H), 4.29 (d,  $J = 13.0$  Hz, 1H), 3.48 (d,  $J = 13.0$  Hz, 1H) ppm;  **$^{13}\text{C NMR}$**  (126 MHz,  $\text{CDCl}_3$ )  $\delta$ : 177.2, 150.2, 144.9, 141.9, 135.3, 134.0, 132.3, 129.4, 129.0, 129.0, 128.7, 128.7, 128.6, 128.4, 127.6, 127.6, 127.5, 127.5, 124.9, 124.8, 123.4, 120.0, 116.6, 116.6, 109.5, 66.2, 44.0, 41.0 ppm; **HRMS** (ESI-TOF)  $m/z$  calcd. for  $\text{C}_{28}\text{H}_{24}\text{N}_3\text{O}_3$   $[\text{M}+\text{H}]^+$ : 450.1812, found: 450.1792; **HPLC analysis**: The enantiomeric excess was determined by HPLC with a Chiralpak IA column ( $n$ -hexane/ $i$ -PrOH = 80/20, 1.0 mL/min, 245 nm):  $t_{\text{major}} = 33.1$  min,  $t_{\text{minor}} = 40.8$  min.

(*R*)-1-Benzyl-3-(2-nitrobenzyl)-3-(*p*-tolylamino)indolin-2-one (**5b**).

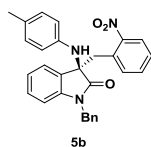

Yellow solid, 29.6 mg, 64% yield, 74% ee, m.p. 143-149 °C,  $[\alpha]_D^{20}$  = 205.6 (c = 0.27, CHCl<sub>3</sub>). **<sup>1</sup>H NMR** (400 MHz, CDCl<sub>3</sub>) δ: 7.73 (d, *J* = 7.8 Hz, 1H), 7.40-7.29 (m, 3H), 7.23-7.11 (m, 5H), 6.99-6.93 (m, 3H), 6.73 (d, *J* = 8.0 Hz, 2H), 6.50 (d, *J* = 8.0 Hz, 1H), 6.20 (d, *J* = 8.0 Hz, 2H), 4.92 (d, *J* = 15.6 Hz, 1H), 4.44-4.40 (m, 2H), 4.28 (d, *J* = 13.0 Hz, 1H), 3.47 (d, *J* = 13.0 Hz, 1H), 2.15 (s, 3H) ppm; **<sup>13</sup>C NMR** (126 MHz, CDCl<sub>3</sub>) δ: 177.3, 150.2, 142.3, 142.1, 135.2, 133.9, 132.2, 129.8, 129.4, 129.4, 129.3, 128.8, 128.6, 128.6, 128.3, 127.7, 127.5, 127.4, 127.4, 124.9, 124.8, 123.3, 117.8, 117.8, 109.4, 66.7, 43.9, 40.8, 20.5 ppm; **HRMS** (ESI-TOF) *m/z* calcd. For C<sub>29</sub>H<sub>26</sub>N<sub>3</sub>O<sub>3</sub> [M+H]<sup>+</sup>: 464.1969, found: 464.1964; **HPLC analysis**: The enantiomeric excess was determined by HPLC with a Chiralpak IA column (*n*-hexane/*i*-PrOH = 80/20, 1.0 mL/min, 245 nm): *t*<sub>major</sub> = 36.9 min, *t*<sub>minor</sub> = 24.6 min.

**(R)-1-Benzyl-3-((4-bromophenyl)amino)-3-(2-nitrobenzyl)indolin-2-one (5c)**

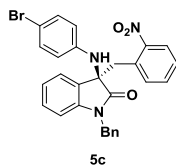

Yellow oil, 39.6 mg, 75% yield, 86% ee,  $[\alpha]_D^{20}$  = 280.9 (c = 0.23, CHCl<sub>3</sub>). **<sup>1</sup>H NMR** (400 MHz, CDCl<sub>3</sub>) δ: 7.74 (dd, *J* = 7.9, 1.5 Hz, 1H), 7.41-7.33 (m, 2H), 7.27-7.23 (m, 4H), 7.18-7.14 (m, 1H), 7.09-7.07 (m, 1H), 7.01-6.96 (m, 5H), 6.55 (dd, *J* = 20.3, 8.4 Hz, 1H), 6.11-6.07 (m, 2H), 4.95 (d, *J* = 15.5 Hz, 1H), 4.64 (brs, 1H), 4.42 (d, *J* = 15.5 Hz, 1H), 4.26 (d, *J* = 13.0 Hz, 1H), 3.45 (d, *J* = 13.1 Hz, 1H) ppm; **<sup>13</sup>C NMR** (101 MHz, CDCl<sub>3</sub>) δ: 176.9, 150.2, 143.9, 141.9, 135.1, 134.0, 132.3, 131.8, 131.8, 129.6, 128.7, 128.7, 128.5, 128.4, 127.8, 127.6, 127.6, 127.1, 124.9, 124.8, 123.5, 118.4, 118.4, 112.3, 109.6, 66.2, 44.1, 40.8 ppm; **HRMS** (ESI-TOF) *m/z* calcd. For C<sub>28</sub>H<sub>23</sub>N<sub>3</sub>O<sub>3</sub>Br [M+H]<sup>+</sup>: 528.0917, found: 528.0914; **HPLC analysis**: The enantiomeric excess was determined by HPLC with a Chiralpak IA column (*n*-hexane/*i*-PrOH = 85/15, 0.8 mL/min, 245 nm): *t*<sub>major</sub> = 87.4 min, *t*<sub>minor</sub> = 32.3 min.

**(R)-1-Benzyl-5-methoxy-3-(2-nitrobenzyl)-3-(phenylamino)indolin-2-one (5d)**

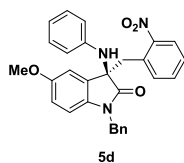

Yellow solid, 41.7 mg, 87% yield, 92% ee, m.p. 200-203 °C,  $[\alpha]_D^{20}$  = 201.9 (c = 0.26, CHCl<sub>3</sub>). **<sup>1</sup>H NMR** (500 MHz, CDCl<sub>3</sub>) δ: 7.71 (d, *J* = 7.9 Hz, 1H), 7.41-7.31 (m, 3H), 7.22-7.21 (m, 3H), 7.00-6.99 (m, 2H), 6.94 (t, *J* = 7.5 Hz, 2H), 6.73-6.66 (m, 3H), 6.42 (d, *J* = 8.5 Hz, 1H), 6.25 (d, *J* = 7.9 Hz, 2H), 4.92 (d, *J* = 15.5 Hz, 1H), 4.56 (brs, 1H), 4.34 (dd, *J* = 28.5, 14.2 Hz, 2H), 3.72 (s, 3H), 3.45 (d, *J* = 12.9 Hz, 1H) ppm; **<sup>13</sup>C NMR** (126 MHz, CDCl<sub>3</sub>) δ: 176.9, 156.5, 150.2, 144.9, 135.3, 135.1, 133.9, 132.2, 129.0, 129.0, 128.6, 128.6, 128.6, 128.4, 128.4, 127.6, 127.5, 127.5, 124.8, 120.0, 116.4, 116.4, 115.1, 110.8, 110.2, 66.6, 55.7, 44.1, 41.0 ppm; **HRMS** (ESI-TOF) *m/z* calcd. For C<sub>29</sub>H<sub>26</sub>N<sub>3</sub>O<sub>4</sub> [M+H]<sup>+</sup>: 480.1918, found: 480.1925; **HPLC analysis**: The enantiomeric excess was determined by HPLC with a Chiralpak IA column (*n*-hexane/*i*-PrOH = 85/15, 0.8 mL/min, 245 nm): *t*<sub>major</sub> = 57.3 min, *t*<sub>minor</sub> = 63.9 min.

**(R)-1-Benzyl-5-methyl-3-(2-nitrobenzyl)-3-(phenylamino)indolin-2-one (5e)**

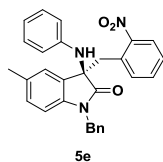

Yellow oil, 32.4 mg, 70% yield, 72% ee,  $[\alpha]_D^{20} = 184.2$  ( $c = 0.26$ ,  $\text{CHCl}_3$ ).  **$^1\text{H NMR}$**  (500 MHz,  $\text{CDCl}_3$ )  $\delta$ : 7.69 (d,  $J = 7.9$  Hz, 1H), 7.39-7.36 (m, 1H), 7.34-7.29 (m, 2H), 7.22-7.21 (m, 3H), 7.03-7.02 (m, 2H), 6.94-6.91 (m, 4H), 6.71-6.67 (m, 1H), 6.42 (d,  $J = 7.8$  Hz, 1H), 6.23 (d,  $J = 7.9$  Hz, 2H), 4.94 (d,  $J = 15.5$  Hz, 1H), 4.56 (brs, 1H), 4.38 (d,  $J = 15.5$  Hz, 1H), 4.28 (d,  $J = 12.9$  Hz, 1H), 3.46 (d,  $J = 12.9$  Hz, 1H), 2.23 (s, 3H) ppm;  **$^{13}\text{C NMR}$**  (126 MHz,  $\text{CDCl}_3$ )  $\delta$ : 177.0, 150.3, 145.0, 139.3, 135.4, 133.9, 133.3, 132.1, 129.6, 129.0, 129.0, 128.6, 128.6, 128.5, 128.3, 127.6, 127.6, 127.6, 127.4, 125.4, 124.7, 119.8, 116.3, 116.3, 109.2, 66.2, 44.0, 41.0, 21.0 ppm; **HRMS** (ESI-TOF)  $m/z$  calcd. For  $\text{C}_{29}\text{H}_{26}\text{N}_3\text{O}_3$   $[\text{M}+\text{H}]^+$ : 464.1969, found: 464.1963; **HPLC analysis**: The enantiomeric excess was determined by HPLC with a Chiralpak IA column ( $n$ -hexane/ $i$ -PrOH = 90/10, 0.8 mL/min, 245 nm):  $t_{\text{major}} = 38.7$  min,  $t_{\text{minor}} = 43.3$  min.

**(R)-1-Benzyl-5-bromo-3-(2-nitrobenzyl)-3-(phenylamino)indolin-2-one (5f)**

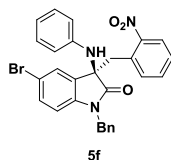

Yellow solid, 39.6 mg, 75% yield, 83% ee, m.p. 175-177 °C,  $[\alpha]_D^{20} = 200.9$  ( $c = 0.45$ ,  $\text{CHCl}_3$ ).  **$^1\text{H NMR}$**  (400 MHz,  $\text{CDCl}_3$ )  $\delta$ : 7.81-7.79 (m, 1H), 7.46-7.37 (m, 2H), 7.29-7.21 (m, 5H), 7.15 (d,  $J = 2.0$  Hz, 1H), 7.03-7.00 (m, 2H), 6.97-6.92 (m, 2H), 6.75-6.71 (m, 1H), 6.45 (d,  $J = 8.3$  Hz, 1H), 6.23-6.21 (m, 2H), 4.98 (d,  $J = 15.5$  Hz, 1H), 4.60 (s, 1H), 4.41 (d,  $J = 15.5$  Hz, 1H), 4.21 (d,  $J = 13.2$  Hz, 1H), 3.45 (d,  $J = 13.2$  Hz, 1H) ppm;  **$^{13}\text{C NMR}$**  (101 MHz,  $\text{CDCl}_3$ )  $\delta$ : 176.7, 150.2, 144.5, 140.8, 134.8, 133.9, 132.4, 132.3, 130.0, 129.1, 129.1, 128.8, 128.8, 128.7, 128.2, 127.9, 127.9, 127.6, 127.6, 125.1, 120.3, 116.6, 116.6, 116.3, 111.0, 66.0, 44.1, 41.1 ppm; **HRMS** (ESI-TOF)  $m/z$  calcd. For  $\text{C}_{28}\text{H}_{23}\text{N}_3\text{O}_3\text{Br}$   $[\text{M}+\text{H}]^+$ : 528.0917, found: 528.0897; **HPLC analysis**: The enantiomeric excess was determined by HPLC with a Chiralpak IA column ( $n$ -hexane/ $i$ -PrOH = 85/15, 0.8 mL/min, 245 nm):  $t_{\text{major}} = 49.2$  min,  $t_{\text{minor}} = 44.7$  min.

**(R)-1-Benzyl-5-chloro-3-(2-nitrobenzyl)-3-(phenylamino)indolin-2-one (5g)**

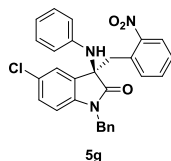

Yellow solid, 29.0 mg, 60% yield, 92% ee, m.p. 160-163 °C,  $[\alpha]_D^{20} = 210.9$  ( $c = 0.51$ ,  $\text{CHCl}_3$ ).  **$^1\text{H NMR}$**  (400 MHz,  $\text{CDCl}_3$ )  $\delta$ : 7.79 (dd,  $J = 8.0, 1.5$  Hz, 1H), 7.46-7.36 (m, 2H), 7.28-7.20 (m, 4H), 7.12 (dd,  $J = 8.3, 2.1$  Hz, 1H), 7.03-7.00 (m, 3H), 6.97-6.92 (m, 2H), 6.75-6.71 (m, 1H), 6.49 (d,  $J = 8.3$  Hz, 1H), 6.23-6.21 (m, 2H), 4.98 (d,  $J = 15.5$  Hz, 1H), 4.60 (s, 1H), 4.41 (d,  $J = 15.5$  Hz, 1H), 4.21 (d,  $J = 13.2$  Hz, 1H), 3.46 (d,  $J = 13.2$  Hz, 1H) ppm;  **$^{13}\text{C NMR}$**  (101 MHz,  $\text{CDCl}_3$ )  $\delta$ : 176.8, 150.2, 144.5, 140.3, 134.8, 133.9, 132.4, 129.6, 129.4, 129.1, 129.1, 129.0, 128.8, 128.8, 128.7, 128.2, 127.9, 127.6, 127.6, 125.2, 125.0, 120.3, 116.6, 116.6, 110.5, 66.1, 44.2, 41.1 ppm; **HRMS** (ESI-TOF)  $m/z$  calcd. For  $\text{C}_{28}\text{H}_{23}\text{N}_3\text{O}_3\text{Cl}$   $[\text{M}+\text{H}]^+$ : 484.1422, found: 484.1405; **HPLC analysis**: The enantiomeric excess was determined by HPLC with a Chiralpak IA column ( $n$ -hexane/ $i$ -PrOH = 80/20, 1.0 mL/min, 245 nm):  $t_{\text{major}} = 31.7$  min,  $t_{\text{minor}} = 25.9$  min.

**(R)-1-Benzyl-5-fluoro-3-(2-nitrobenzyl)-3-(phenylamino)indolin-2-one (5h)**

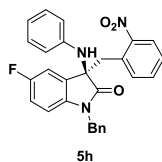

Yellow oil, 42.5 mg, 91% yield, 92% ee,  $[\alpha]_D^{20} = 212.7$  ( $c = 0.70$ ,  $\text{CHCl}_3$ ).  **$^1\text{H NMR}$**  (400 MHz,  $\text{CDCl}_3$ )  $\delta$ : 7.77 (dd,  $J = 8.0, 1.5$  Hz, 1H), 7.46-7.36 (m, 2H), 7.31-7.29 (m, 1H), 7.24-7.21 (m, 3H), 7.02-7.00 (m, 2H), 6.96-6.92 (m, 2H), 6.87-6.82 (m, 2H), 6.73 (t,  $J = 7.4$  Hz, 1H), 6.48 (dd,  $J = 8.2, 3.9$  Hz, 1H), 6.23 (dd,  $J = 8.6, 0.9$  Hz, 2H), 4.97 (d,  $J = 15.5$  Hz, 1H), 4.59 (brs, 1H), 4.41 (d,  $J = 15.6$  Hz, 1H), 4.22 (d,  $J = 13.1$  Hz, 1H), 3.48-3.45 (m, 1H) ppm;  **$^{13}\text{C NMR}$**  (126 MHz,  $\text{CDCl}_3$ )  $\delta$ : 177.0, 159.6 (d,  $J = 243.3$  Hz), 150.3, 144.6, 137.8, 135.0, 133.9, 132.4, 129.6 (d,  $J = 7.7$  Hz), 129.0, 129.0, 128.8, 128.8, 128.7, 128.2, 127.8, 127.5, 127.5, 125.0, 120.3, 116.6, 116.6, 115.8 (d,  $J = 23.6$  Hz), 112.9 (d,  $J = 24.9$  Hz), 110.3 (d,  $J = 8.0$  Hz), 66.3, 44.2, 41.0 ppm;  **$^{19}\text{F NMR}$**  (376 MHz,  $\text{CDCl}_3$ )  $\delta$ : -118.99 (td,  $J = 8.3, 4.0$  Hz) ppm; **HRMS** (ESI-TOF)  $m/z$  calcd. For  $\text{C}_{28}\text{H}_{23}\text{N}_3\text{O}_3\text{F}$   $[\text{M}+\text{H}]^+$ : 468.1718, found: 468.1701; **HPLC analysis**: The enantiomeric excess was determined by HPLC with a Chiralpak IA column ( $n$ -hexane/ $i$ -PrOH = 80/20, 1.0 mL/min, 245 nm):  $t_{\text{major}} = 33.9$  min,  $t_{\text{minor}} = 27.6$  min.

(*R*)-1-(4-Methoxyphenyl)-3-(2-nitrobenzyl)-3-(phenylamino)indolin-2-one (**5i**)

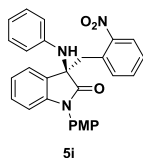

Yellow solid, 31.6 mg, 68% yield, 83% ee, m.p. 115-118 °C,  $[\alpha]_D^{20} = 96.8$  ( $c = 0.56$ , MeOH).  **$^1\text{H NMR}$**  (400 MHz,  $\text{CDCl}_3$ )  $\delta$ : 7.73-7.71 (m, 1H), 7.46-7.35 (m, 3H), 7.24-7.15 (m, 2H), 7.06-6.92 (m, 5H), 6.85-6.83 (m, 2H), 6.70 (t,  $J = 7.4$  Hz, 1H), 6.50 (d,  $J = 7.8$  Hz, 1H), 6.34-6.32 (m, 2H), 4.64 (brs, 1H), 4.45 (d,  $J = 12.7$  Hz, 1H), 3.82 (s, 3H), 3.51 (d,  $J = 12.7$  Hz, 1H) ppm;  **$^{13}\text{C NMR}$**  (101 MHz,  $\text{CDCl}_3$ )  $\delta$ : 176.6, 159.3, 150.1, 145.0, 143.1, 134.1, 132.4, 129.4, 129.0, 129.0, 128.5, 128.4, 127.5, 127.5, 126.9, 126.5, 124.9, 124.8, 124.0, 119.7, 115.7, 115.7, 114.9, 114.9, 109.4, 66.3, 55.5, 41.1 ppm; **HRMS** (ESI-TOF)  $m/z$  calcd. For  $\text{C}_{28}\text{H}_{24}\text{N}_3\text{O}_4$   $[\text{M}+\text{H}]^+$ : 466.1761, found: 466.1751; **HPLC analysis**: The enantiomeric excess was determined by HPLC with a Chiralpak IC column ( $n$ -hexane/ $i$ -PrOH = 80/20, 1.0 mL/min, 245 nm):  $t_{\text{major}} = 32.5$  min,  $t_{\text{minor}} = 18.4$  min.

(*R*)-1-Methyl-3-(2-nitrobenzyl)-3-(phenylamino)indolin-2-one (**5j**)

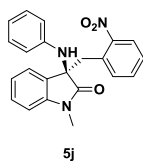

Yellow solid, 18.7 mg, 50% yield, 76% ee, m.p. 138-142 °C,  $[\alpha]_D^{20} = 149.1$  ( $c = 0.11$ ,  $\text{CHCl}_3$ ).  **$^1\text{H NMR}$**  (400 MHz,  $\text{CDCl}_3$ )  $\delta$ : 7.70 (dd,  $J = 8.1, 1.2$  Hz, 1H), 7.46-7.42 (m, 1H), 7.34-7.24 (m, 3H), 7.08-6.92 (m, 4H), 6.67-6.63 (m, 2H), 6.18 (dd,  $J = 8.6, 0.9$  Hz, 2H), 4.60 (brs, 1H), 4.25 (d,  $J = 12.9$  Hz, 1H), 3.41 (d,  $J = 12.9$  Hz, 1H), 3.01 (s, 3H) ppm;  **$^{13}\text{C NMR}$**  (101 MHz,  $\text{CDCl}_3$ )  $\delta$ : 177.1, 150.1, 144.9, 142.5, 133.8, 132.0, 129.5, 129.0, 129.0, 128.5, 128.4, 127.4, 124.8, 124.5, 123.5, 119.5, 115.4, 115.4, 108.2, 66.0, 41.2, 26.1 ppm; **HRMS** (ESI-TOF)  $m/z$  calcd. For  $\text{C}_{22}\text{H}_{20}\text{N}_3\text{O}_3$   $[\text{M}+\text{H}]^+$ : 374.1499, found: 374.1491; **HPLC analysis**: The enantiomeric excess was determined by HPLC with a Chiralpak AD-H column ( $n$ -hexane/ $i$ -PrOH = 90/10, 0.8 mL/min, 245 nm):  $t_{\text{major}} = 67.3$  min,  $t_{\text{minor}} = 88.2$  min.

(*R*)-1-Allyl-3-(2-nitrobenzyl)-3-(phenylamino)indolin-2-one (**5k**)



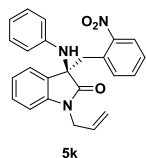

Yellow oil, 13.2 mg, 33% yield, 97% ee,  $[\alpha]_D^{20} = 133.9$  ( $c = 0.16$ ,  $\text{CHCl}_3$ ).  **$^1\text{H NMR}$**  (500 MHz,  $\text{CDCl}_3$ )  $\delta$ : 7.71 (dd,  $J = 8.1, 1.1$  Hz, 1H), 7.43 (td,  $J = 7.5, 1.2$  Hz, 1H), 7.35-7.29 (m, 2H), 7.25-7.21 (m, 1H), 7.12-7.11 (m, 1H), 7.02-6.99 (m, 1H), 6.95-6.92 (m, 2H), 6.68-6.65 (m, 2H), 6.22 (d,  $J = 7.8$  Hz, 2H), 5.53-5.46 (m, 1H), 5.08 (dd,  $J = 10.3, 1.0$  Hz, 1H), 4.98-4.94 (m, 1H), 4.55 (brs, 1H), 4.26 (d,  $J = 12.9$  Hz, 1H), 4.14 (d,  $J = 5.5$  Hz, 2H), 3.45 (d,  $J = 12.9$  Hz, 1H) ppm;  **$^{13}\text{C NMR}$**  (126 MHz,  $\text{CDCl}_3$ )  $\delta$ : 176.8, 150.2, 144.8, 142.0, 134.0, 132.3, 131.0, 129.4, 128.9, 128.9, 128.5, 128.4, 127.4, 124.8, 124.7, 123.4, 119.8, 118.0, 116.1, 116.1, 109.3, 66.1, 42.5, 41.0 ppm; **HRMS** (ESI-TOF)  $m/z$  calcd. For  $\text{C}_{24}\text{H}_{22}\text{N}_3\text{O}_3$   $[\text{M}+\text{H}]^+$ : 400.1656, found: 400.1655; **HPLC analysis**: The enantiomeric excess was determined by HPLC with a Chiralpak IA column ( $n$ -hexane/ $i$ -PrOH = 90/10, 1.0 mL/min, 245 nm):  $t_{\text{major}} = 38.6$  min,  $t_{\text{minor}} = 42.0$  min.

**(R)-1-Benzyl-3-(3-nitrobenzyl)-3-(phenylamino)indolin-2-one (5l)**

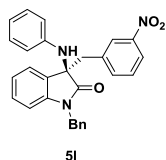

Yellow oil, 21.6 mg, 48% yield, 78% ee,  $[\alpha]_D^{20} = 78.6$  ( $c = 0.17$ ,  $\text{CHCl}_3$ ).  **$^1\text{H NMR}$**  (400 MHz,  $\text{CDCl}_3$ )  $\delta$ : 8.00-7.97 (m, 1H), 7.59-7.58 (m, 1H), 7.43 (dd,  $J = 7.2, 1.2$  Hz, 1H), 7.24-7.09 (m, 7H), 6.99-6.95 (m, 2H), 6.89-6.87 (m, 2H), 6.74 (t,  $J = 7.4$  Hz, 1H), 6.50 (d,  $J = 7.2$  Hz, 1H), 6.33-6.31 (m, 2H), 4.82 (d,  $J = 15.5$  Hz, 1H), 4.46 (brs, 1H), 4.34 (d,  $J = 15.5$  Hz, 1H), 3.42 (s, 2H) ppm;  **$^{13}\text{C NMR}$**  (126 MHz,  $\text{CDCl}_3$ )  $\delta$ : 176.6, 147.6, 144.8, 142.2, 136.5, 135.3, 135.0, 129.7, 129.1, 129.1, 128.6, 128.6, 128.6, 128.1, 127.7, 127.4, 127.4, 125.0, 124.3, 123.3, 122.3, 120.2, 116.6, 116.6, 109.7, 66.2, 45.6, 43.9 ppm; **HRMS** (ESI-TOF)  $m/z$  calcd. For  $\text{C}_{28}\text{H}_{24}\text{N}_3\text{O}_3$   $[\text{M}+\text{H}]^+$ : 450.1812, found: 450.1822; **HPLC analysis**: The enantiomeric excess was determined by HPLC with a Chiralpak IC column ( $n$ -hexane/ $i$ -PrOH = 80/20, 1.0 mL/min, 245 nm):  $t_{\text{major}} = 25.5$  min,  $t_{\text{minor}} = 10.1$  min.

**(R)-1-Benzyl-3-(4-nitrobenzyl)-3-(phenylamino)indolin-2-one (5m)**

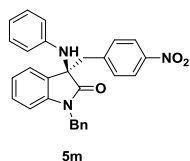

Yellow oil, 30.1 mg, 67% yield, 70% ee,  $[\alpha]_D^{20} = 16.1$  ( $c = 0.34$ ,  $\text{CHCl}_3$ ).  **$^1\text{H NMR}$**  (400 MHz,  $\text{CDCl}_3$ )  $\delta$ : 7.86-7.84 (m, 2H), 7.43 (dd,  $J = 7.3, 1.0$  Hz, 1H), 7.22-7.08 (m, 5H), 6.99-6.94 (m, 4H), 6.89-6.87 (m, 2H), 6.74 (t,  $J = 7.4$  Hz, 1H), 6.54 (d,  $J = 7.8$  Hz, 1H), 6.33-6.30 (m, 2H), 4.76 (d,  $J = 15.5$  Hz, 1H), 4.48-4.41 (m, 2H), 3.42 (s, 2H) ppm;  **$^{13}\text{C NMR}$**  (101 MHz,  $\text{CDCl}_3$ )  $\delta$ : 176.6, 147.1, 144.8, 142.3, 140.9, 135.0, 131.1, 131.1, 129.7, 129.1, 129.1, 128.6, 128.6, 128.2, 127.8, 127.5, 127.5, 124.2, 123.2, 122.8, 122.8, 120.2, 116.6, 116.6, 109.7, 66.2, 45.8, 43.9 ppm; **HRMS** (ESI-TOF)  $m/z$  calcd. For  $\text{C}_{28}\text{H}_{24}\text{N}_3\text{O}_3$   $[\text{M}+\text{H}]^+$ : 450.1812, found: 450.1807; **HPLC analysis**: The enantiomeric excess was determined by HPLC with a Chiralpak IC column ( $n$ -hexane/ $i$ -PrOH = 80/20, 1.0 mL/min, 245 nm):  $t_{\text{major}} = 17.4$  min,  $t_{\text{minor}} = 10.6$  min.

**(R)-1-Benzyl-3-(2-methoxy-4-nitrobenzyl)-3-(phenylamino)indolin-2-one (5n)**

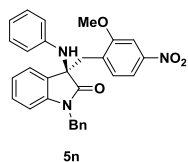

Yellow solid, 25.8 mg, 54% yield, 60% ee, m.p. 158-162 °C,  $[\alpha]_D^{20}$  = 64.6 (c = 0.22, CHCl<sub>3</sub>). **<sup>1</sup>H NMR** (400 MHz, CDCl<sub>3</sub>) δ: 7.64-7.62 (m, 2H), 7.27-7.25 (m, 3H), 7.19-7.15 (m, 3H), 6.99-6.90 (m, 5H), 6.71-6.64 (m, 2H), 6.15 (d, *J* = 7.8 Hz, 2H), 5.09 (brs, 1H), 5.00 (d, *J* = 15.4 Hz, 1H), 4.70 (d, *J* = 15.4 Hz, 1H), 3.86 (s, 3H), 3.76 (d, *J* = 12.8 Hz, 1H), 2.99 (d, *J* = 12.8 Hz, 1H) ppm; **<sup>13</sup>C NMR** (126 MHz, CDCl<sub>3</sub>) δ: 177.6, 158.2, 148.2, 145.0, 141.8, 135.5, 132.8, 130.6, 129.2, 129.2, 129.0, 128.7, 128.7, 128.3, 127.8, 127.7, 127.7, 125.2, 122.3, 119.3, 115.5, 115.5, 115.2, 109.5, 105.4, 65.9, 55.86, 44.1, 39.2 ppm; **HRMS** (ESI-TOF) *m/z* calcd. For C<sub>29</sub>H<sub>26</sub>N<sub>3</sub>O<sub>4</sub> [M+H]<sup>+</sup>: 480.1918, found: 480.1909; **HPLC analysis**: The enantiomeric excess was determined by HPLC with a Chiralpak IC column (*n*-hexane/*i*-PrOH = 80/20, 1.0 mL/min, 245 nm): *t*<sub>major</sub> = 19.5 min, *t*<sub>minor</sub> = 13.6 min.

**(R)-1-Benzyl-3-(4,5-dimethoxy-2-nitrobenzyl)-3-(phenylamino)indolin-2-one (5o)**

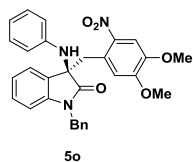

Yellow oil, 21.9 mg, 43% yield, 76% ee,  $[\alpha]_D^{20}$  = 97.9 (c = 0.29, CHCl<sub>3</sub>). **<sup>1</sup>H NMR** (500 MHz, CDCl<sub>3</sub>) δ: 7.37 (s, 1H), 7.26-7.15 (m, 5H), 7.00-6.99 (m, 3H), 6.92 (t, *J* = 7.4 Hz, 2H), 6.70 (t, *J* = 7.3 Hz, 1H), 6.60-6.59 (m, 2H), 6.24 (d, *J* = 7.9 Hz, 2H), 4.93 (d, *J* = 15.5 Hz, 1H), 4.73 (brs, 1H), 4.54 (d, *J* = 15.6 Hz, 1H), 4.35 (d, *J* = 13.0 Hz, 1H), 3.89 (s, 3H), 3.73 (s, 3H), 3.43 (d, *J* = 13.1 Hz, 1H) ppm; **<sup>13</sup>C NMR** (101 MHz, CDCl<sub>3</sub>) δ: 177.4, 151.9, 147.9, 144.9, 142.6, 142.1, 135.3, 129.4, 129.0, 129.0, 128.7, 128.7, 128.7, 128.0, 127.3, 127.3, 125.0, 123.2, 123.0, 119.9, 116.6, 116.6, 115.1, 109.5, 108.2, 66.5, 56.3, 56.2, 44.0, 40.9 ppm; **HRMS** (ESI-TOF) *m/z* calcd. For C<sub>30</sub>H<sub>28</sub>N<sub>3</sub>O<sub>5</sub> [M+H]<sup>+</sup>: 510.2023, found: 510.2016; **HPLC analysis**: The enantiomeric excess was determined by HPLC with a Chiralpak IC column (*n*-hexane/*i*-PrOH = 80/20, 1.0 mL/min, 245 nm): *t*<sub>major</sub> = 86.0 min, *t*<sub>minor</sub> = 20.0 min.

**(R)-1-Benzyl-3-((6-nitrobenzo[d][1,3]dioxol-5-yl)methyl)-3-(phenylamino)indolin-2-one (5p)**

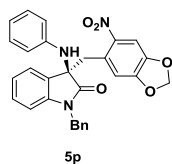

Yellow oil, 10.8 mg, 22% yield, 72% ee,  $[\alpha]_D^{20}$  = 101.8 (c = 0.11, CHCl<sub>3</sub>). **<sup>1</sup>H NMR** (400 MHz, CDCl<sub>3</sub>) δ: 7.29 (s, 1H), 7.24-7.23 (m, 3H), 7.19-7.14 (m, 2H), 7.05-6.90 (m, 5H), 6.71-6.68 (m, 2H), 6.63 (d, *J* = 7.8 Hz, 1H), 6.23 (d, *J* = 8.2 Hz, 2H), 6.05 (d, *J* = 3.6 Hz, 2H), 4.96 (d, *J* = 15.6 Hz, 1H), 4.64-4.60 (m, 2H), 4.22 (d, *J* = 13.2 Hz, 1H), 3.41 (d, *J* = 13.2 Hz, 1H) ppm; **<sup>13</sup>C NMR** (101 MHz, CDCl<sub>3</sub>) δ: 177.3, 150.9, 147.2, 144.8, 144.3, 142.1, 135.4, 129.4, 129.0, 129.0, 128.7, 128.7, 127.8, 127.6, 127.5, 127.5, 125.1, 124.8, 123.4, 120.0, 116.7, 116.7, 112.3, 109.6, 105.9, 102.9, 66.2, 44.1, 41.2 ppm; **HRMS** (ESI-TOF) *m/z* calcd. For C<sub>29</sub>H<sub>24</sub>N<sub>3</sub>O<sub>5</sub> [M+H]<sup>+</sup>: 494.1710, found: 494.1684; **HPLC analysis**: The enantiomeric excess was determined by HPLC with a Chiralpak IA column (*n*-hexane/*i*-PrOH = 80/20, 1.0 mL/min, 245 nm): *t*<sub>major</sub> = 40.6 min, *t*<sub>minor</sub> = 62.5 min.

**(R)-1-Benzyl-3-(3-methyl-2-nitrobenzyl)-3-(phenylamino)indolin-2-one (5q)**

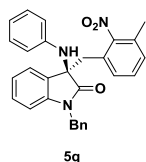

Yellow oil, 31.4 mg, 68% yield, 88% ee,  $[\alpha]_D^{20} = 129.1$  ( $c = 0.35$ ,  $\text{CHCl}_3$ ).  **$^1\text{H NMR}$**  (400 MHz,  $\text{CDCl}_3$ )  $\delta$ : 7.24-7.17 (m, 6H), 7.11-6.97 (m, 5H), 6.94-6.90 (m, 2H), 6.71-6.64 (m, 2H), 6.23 (d,  $J = 8.0$  Hz, 2H), 4.96 (d,  $J = 15.6$  Hz, 1H), 4.69-4.65 (m, 2H), 3.52 (d,  $J = 13.9$  Hz, 1H), 3.22 (d,  $J = 13.9$  Hz, 1H), 2.25 (s, 3H) ppm;  **$^{13}\text{C NMR}$**  (126 MHz,  $\text{CDCl}_3$ )  $\delta$ : 177.4, 152.3, 144.8, 142.0, 135.4, 130.7, 130.4, 130.1, 129.6, 129.4, 128.9, 128.9, 128.7, 128.7, 128.1, 127.6, 127.5, 127.5, 126.1, 125.0, 123.2, 119.9, 116.5, 116.5, 109.6, 65.5, 44.1, 40.6, 18.1 ppm; **HRMS** (ESI-TOF)  $m/z$  calcd. For  $\text{C}_{29}\text{H}_{26}\text{N}_3\text{O}_3$   $[\text{M}+\text{H}]^+$ : 464.1969, found: 464.1975; **HPLC analysis**: The enantiomeric excess was determined by HPLC with a Chiralpak IA column ( $n$ -hexane/ $i$ -PrOH = 80/20, 1.0 mL/min, 245 nm):  $t_{\text{major}} = 61.4$  min,  $t_{\text{minor}} = 21.8$  min.

**(R)-1-Benzyl-3-(5-chloro-2-nitrobenzyl)-3-(phenylamino)indolin-2-one (5r)**

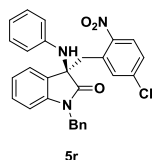

Yellow oil, 10.1 mg, 21% yield, 68% ee,  $[\alpha]_D^{20} = 57.5$  ( $c = 0.16$ , MeOH).  **$^1\text{H NMR}$**  (400 MHz,  $\text{CDCl}_3$ )  $\delta$ : 7.72 (d,  $J = 8.7$  Hz, 1H), 7.33-7.27 (m, 2H), 7.23-7.22 (m, 3H), 7.18-7.09 (m, 2H), 7.04-6.90 (m, 5H), 6.72 (t,  $J = 7.3$  Hz, 1H), 6.58 (d,  $J = 7.8$  Hz, 1H), 6.25 (d,  $J = 8.1$  Hz, 2H), 5.01 (d,  $J = 15.5$  Hz, 1H), 4.54 (brs, 1H), 4.45 (d,  $J = 15.5$  Hz, 1H), 4.24 (d,  $J = 13.0$  Hz, 1H), 3.43 (d,  $J = 13.1$  Hz, 1H) ppm;  **$^{13}\text{C NMR}$**  (101 MHz,  $\text{CDCl}_3$ )  $\delta$ : 177.0, 148.4, 144.6, 141.9, 138.6, 135.2, 133.7, 130.8, 129.6, 129.0, 129.0, 128.7, 128.7, 128.5, 127.7, 127.4, 127.4, 127.3, 126.3, 124.7, 123.4, 120.4, 117.1, 117.1, 109.7, 66.2, 44.0, 40.7 ppm; **HRMS** (ESI-TOF)  $m/z$  calcd. For  $\text{C}_{28}\text{H}_{23}\text{N}_3\text{O}_3\text{Cl}$   $[\text{M}+\text{H}]^+$ : 484.1422, found: 484.1399; **HPLC analysis**: The enantiomeric excess was determined by HPLC with a Chiralpak IA column ( $n$ -hexane/ $i$ -PrOH = 80/20, 1.0 mL/min, 245 nm):  $t_{\text{major}} = 16.5$  min,  $t_{\text{minor}} = 21.4$  min.

**(R)-4-(2-Aminobenzyl)-5-methyl-2-phenyl-4-(phenylamino)-2,4-dihydro-3H-pyrazol-3-one (6a)**

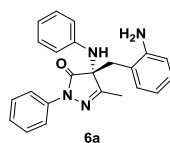

Yellow oil, 26.3 mg, 71% yield, 88% ee,  $[\alpha]_D^{20} = 160.9$  ( $c = 0.21$ ,  $\text{CHCl}_3$ ).  **$^1\text{H NMR}$**  (500 MHz,  $\text{CDCl}_3$ )  $\delta$ : 7.69 (d,  $J = 8.3$  Hz, 2H), 7.37 (t,  $J = 7.9$  Hz, 2H), 7.19 (t,  $J = 7.4$  Hz, 1H), 7.10-7.05 (m, 3H), 6.97 (dd,  $J = 7.5$ , 1.6 Hz, 1H), 6.74 (tt,  $J = 7.4$ , 1.5 Hz, 2H), 6.66 (dd,  $J = 7.9$ , 1.2 Hz, 1H), 6.36 (d,  $J = 8.1$  Hz, 2H), 5.22 (brs, 1H), 3.95 (brs, 2H), 3.20 (s, 2H), 2.08 (s, 3H) ppm;  **$^{13}\text{C NMR}$**  (126 MHz,  $\text{CDCl}_3$ )  $\delta$ : 174.2, 163.3, 145.6, 144.7, 137.7, 132.0, 129.6, 129.6, 129.2, 128.9, 128.9, 125.6, 119.6, 119.6, 119.3, 119.3, 118.0, 117.7, 113.4, 113.4, 70.2, 38.8, 14.5 ppm; **HRMS** (ESI-TOF)  $m/z$  calcd. For  $\text{C}_{23}\text{H}_{23}\text{N}_4\text{O}$   $[\text{M}+\text{H}]^+$ : 371.1866, found: 371.1868; **HPLC analysis**: The enantiomeric excess was determined by HPLC with a Chiralpak IC column ( $n$ -hexane/ $i$ -PrOH = 80/20, 1.0 mL/min, 254 nm):  $t_{\text{major}} = 7.9$  min,  $t_{\text{minor}} = 8.8$  min.

**2,2,6,6-Tetramethyl-1-((2-nitrobenzyl)oxy)piperidine (8a)<sup>[3]</sup>**

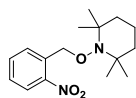

8a

Red oil, 19.9 mg, 68% yield. **<sup>1</sup>H NMR** (400 MHz, CDCl<sub>3</sub>) δ: 8.05 (dd, *J* = 8.2, 1.1 Hz, 1H), 7.89 (d, *J* = 7.3 Hz, 1H), 7.67-7.63 (m, 1H), 7.41 (t, *J* = 7.7 Hz, 1H), 5.20 (s, 2H), 1.58-1.48 (m, 5H), 1.38-1.33 (m, 1H), 1.18 (s, 12H) ppm; **<sup>13</sup>C NMR** (101 MHz, CDCl<sub>3</sub>) δ: 146.9, 135.2, 133.5, 128.4, 127.4, 124.5, 75.0, 60.1, 39.7, 39.7, 39.7, 32.9, 32.9, 20.5, 20.5, 17.1 ppm; **HRMS** (ESI-TOF) *m/z* calcd. For C<sub>16</sub>H<sub>25</sub>N<sub>2</sub>O<sub>3</sub> [M+H]<sup>+</sup>: 293.1860, found: 293.1865.

## 6. Data for X-Ray Crystal Structures of 3d and 5d

Table 1 Crystal data and structure refinement of **3d**

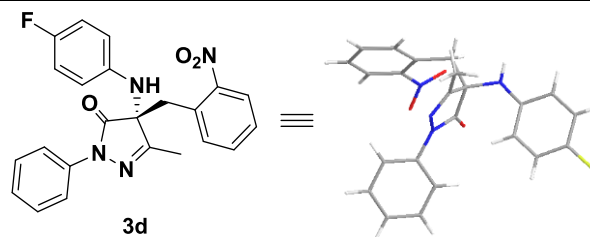

|                                             |                                                                |
|---------------------------------------------|----------------------------------------------------------------|
| Empirical formula                           | C <sub>23</sub> H <sub>19</sub> FN <sub>4</sub> O <sub>3</sub> |
| Formula weight                              | 418.42                                                         |
| Temperature/K                               | 100.00(10)                                                     |
| Crystal system                              | monoclinic                                                     |
| Space group                                 | P2 <sub>1</sub>                                                |
| a/Å                                         | 11.22990(10)                                                   |
| b/Å                                         | 7.59620(10)                                                    |
| c/Å                                         | 11.50980(10)                                                   |
| α°                                          | 90                                                             |
| β°                                          | 91.8060(10)                                                    |
| γ°                                          | 90                                                             |
| Volume/Å <sup>3</sup>                       | 981.351(18)                                                    |
| Z                                           | 2                                                              |
| ρ <sub>calc</sub> /mg/mm <sup>3</sup>       | 1.416                                                          |
| μ/mm <sup>-1</sup>                          | 0.852                                                          |
| F(000)                                      | 436.0                                                          |
| 2θ range for data collection/°              | 7.684 to 156.392°                                              |
| Index ranges                                | -14 ≤ h ≤ 13, -9 ≤ k ≤ 8, -14 ≤ l ≤ 14                         |
| Reflections collected                       | 19231                                                          |
| Independent reflections                     | 3917[R(int) = 0.0467]                                          |
| Data/restraints/parameters                  | 3917/1/282                                                     |
| Goodness-of-fit on F <sup>2</sup>           | 1.045                                                          |
| Final R indexes [I ≥ 2σ(I)]                 | R <sub>1</sub> = 0.0311, wR <sub>2</sub> = 0.0812              |
| Final R indexes [all data]                  | R <sub>1</sub> = 0.0316, wR <sub>2</sub> = 0.0817              |
| Largest diff. peak/hole / e Å <sup>-3</sup> | 0.17/-0.15                                                     |

Table 2 Crystal data and structure refinement of **5d**

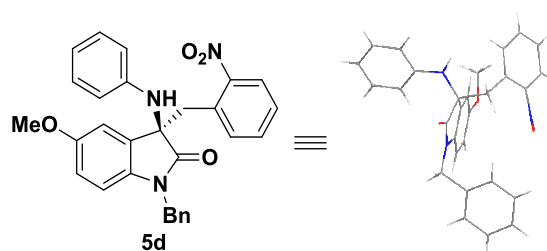

|                                             |                                                               |
|---------------------------------------------|---------------------------------------------------------------|
| Empirical formula                           | C <sub>29</sub> H <sub>25</sub> N <sub>3</sub> O <sub>4</sub> |
| Formula weight                              | 479.52                                                        |
| Temperature/K                               | 100.00(10)                                                    |
| Crystal system                              | monoclinic                                                    |
| Space group                                 | P2 <sub>1</sub> /c                                            |
| a/Å                                         | 10.0511(4)                                                    |
| b/Å                                         | 19.4219(8)                                                    |
| c/Å                                         | 12.2312(4)                                                    |
| α°                                          | 90                                                            |
| β°                                          | 100.502(3)                                                    |
| γ°                                          | 90                                                            |
| Volume/Å <sup>3</sup>                       | 2347.68(15)                                                   |
| Z                                           | 4                                                             |
| ρ <sub>calc</sub> /mg/mm <sup>3</sup>       | 1.357                                                         |
| μ/mm <sup>-1</sup>                          | 0.743                                                         |
| F(000)                                      | 1008.0                                                        |
| Crystal size/mm <sup>3</sup>                | 0.1 × 0.05 × 0.05                                             |
| 2θ range for data collection/°              | 8.648 to 152.398                                              |
| Index ranges                                | -12 ≤ h ≤ 12, -22 ≤ k ≤ 24, -14 ≤ l ≤ 15                      |
| Reflections collected                       | 17966                                                         |
| Independent reflections                     | 4692[R(int) = 0.1039]                                         |
| Data/restraints/parameters                  | 4692/0/327                                                    |
| Goodness-of-fit on F <sup>2</sup>           | 1.067                                                         |
| Final R indexes [I ≥ 2σ(I)]                 | R <sub>1</sub> = 0.0731, wR <sub>2</sub> = 0.1841             |
| Final R indexes [all data]                  | R <sub>1</sub> = 0.0885, wR <sub>2</sub> = 0.1957             |
| Largest diff. peak/hole / e Å <sup>-3</sup> | 0.53/-0.67                                                    |

## 7. References

- [1] (a) Y.-H. Shi, Z. Wang, Y. Shi, W.-P. Deng, *Tetrahedron* **2012**, *68*, 3649-3653; (b) S. Mahajan, P. Chauhan, U. Kaya, K. Deckers, K. Rissanen, D. Enders, *Chem. Commun.* **2017**, *53*, 6633-6636.
- [2] (a) B.-S. Li, Y. Wang, R. S. J. Proctor, Y. Zhang, R. D. Webster, S. Yang, B. Song, Y. R. Chi, *Nat. Commun.* **2016**, *7*, 12933-12940; (b) Y. Wang, Y. Du, X. Huang, X. Wu, Y. Zhang, S. Yang, Y. R. Chi, *Org. Lett.* **2017**, *19*, 632-635.
- [3] R. Ding, B. Yu, *Asian Journal of Organic Chemistry*, **2018**, *7*, 2427-2430.

## 8. Copies of NMR Spectra

### <sup>1</sup>H NMR spectrum of compound 3a (in CDCl<sub>3</sub>)

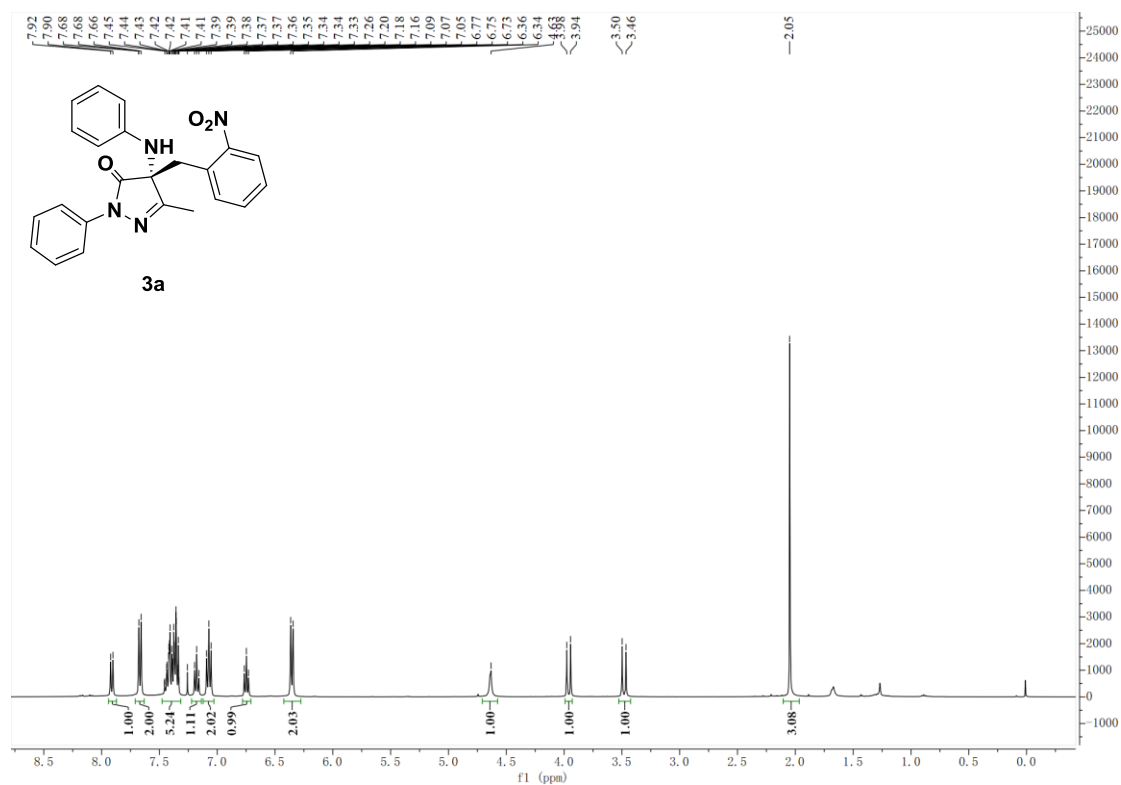

### <sup>13</sup>C NMR spectrum of compound 3a (in CDCl<sub>3</sub>)

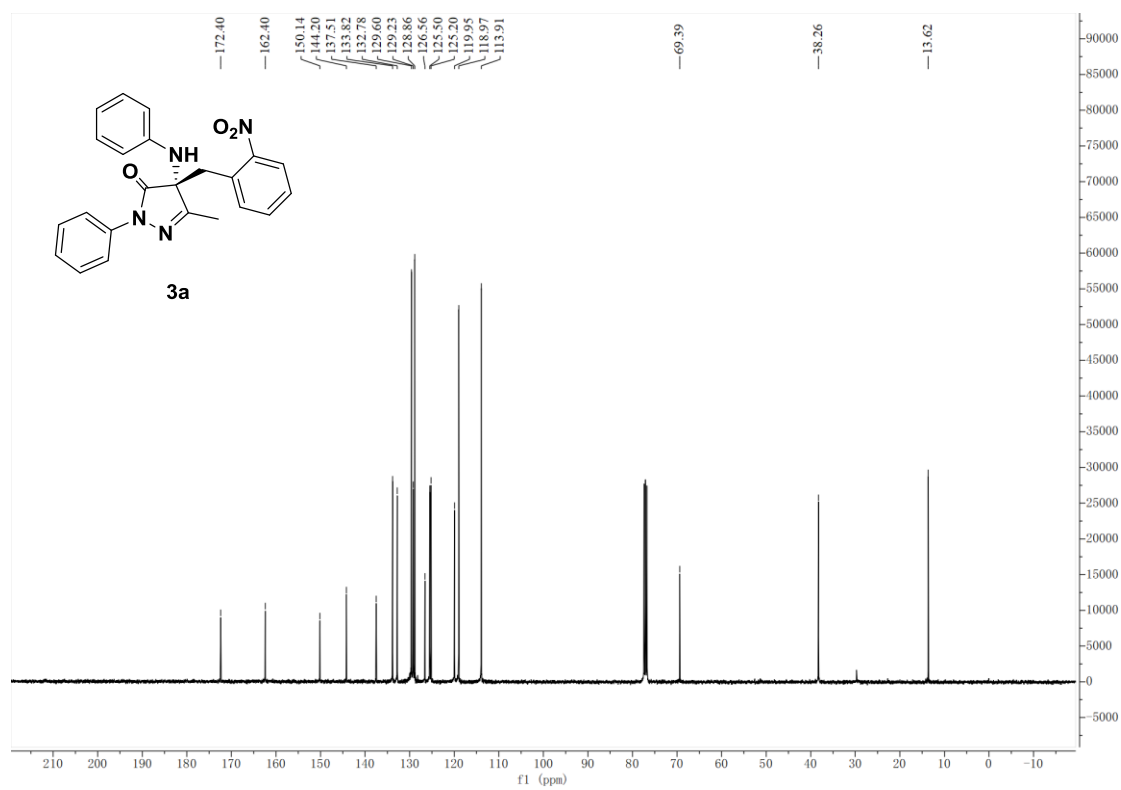



### <sup>1</sup>H NMR spectrum of compound 3b (in CDCl<sub>3</sub>)

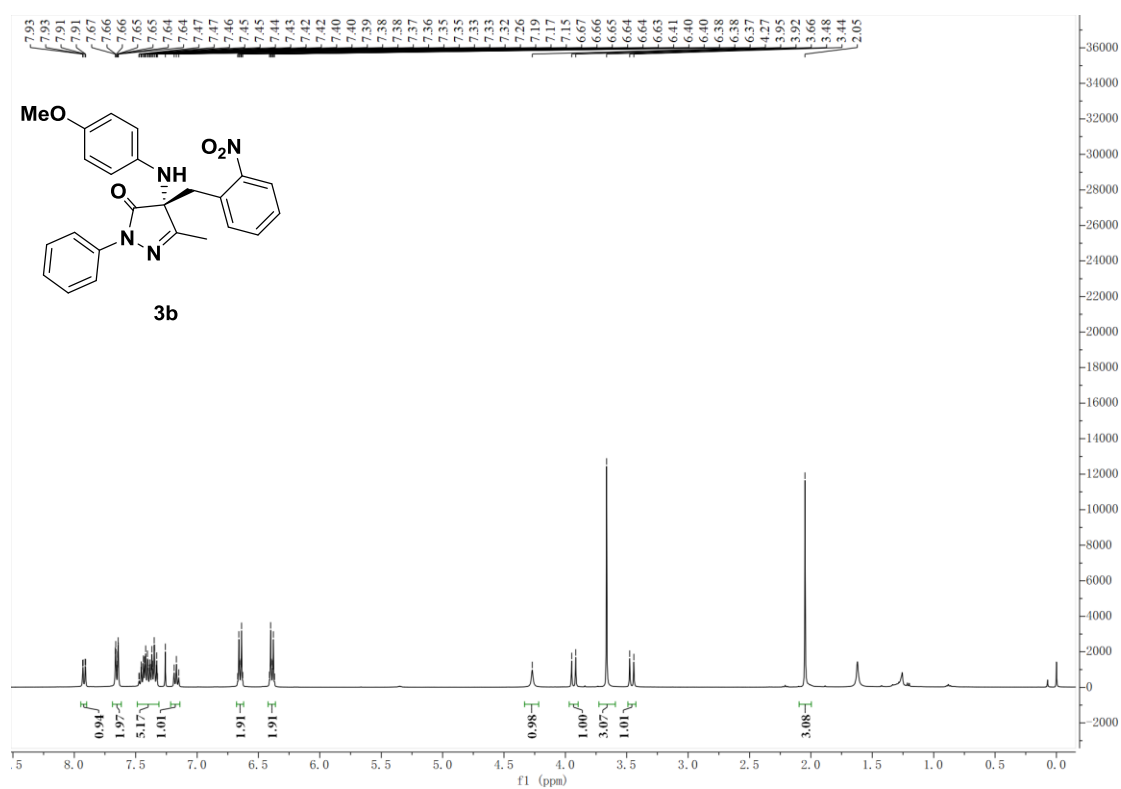

### <sup>13</sup>C NMR spectrum of compound 3b (in CDCl<sub>3</sub>)

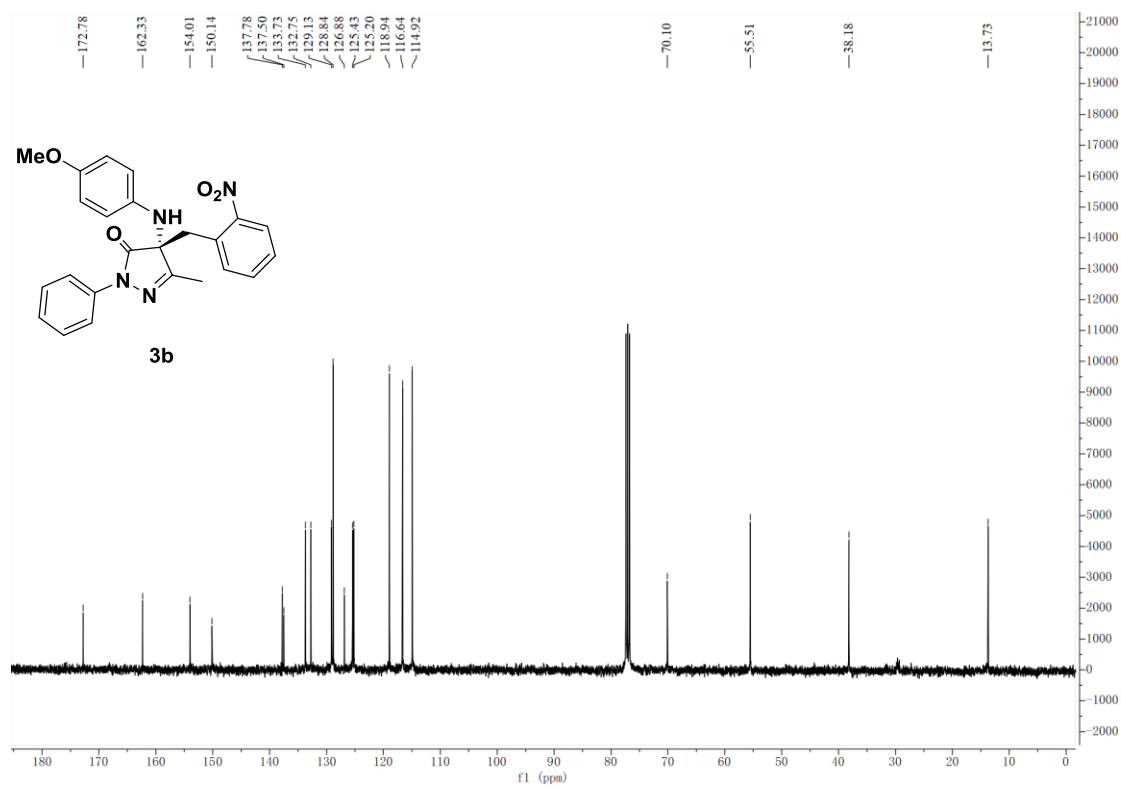

### <sup>1</sup>H NMR spectrum of compound 3c (in CDCl<sub>3</sub>)

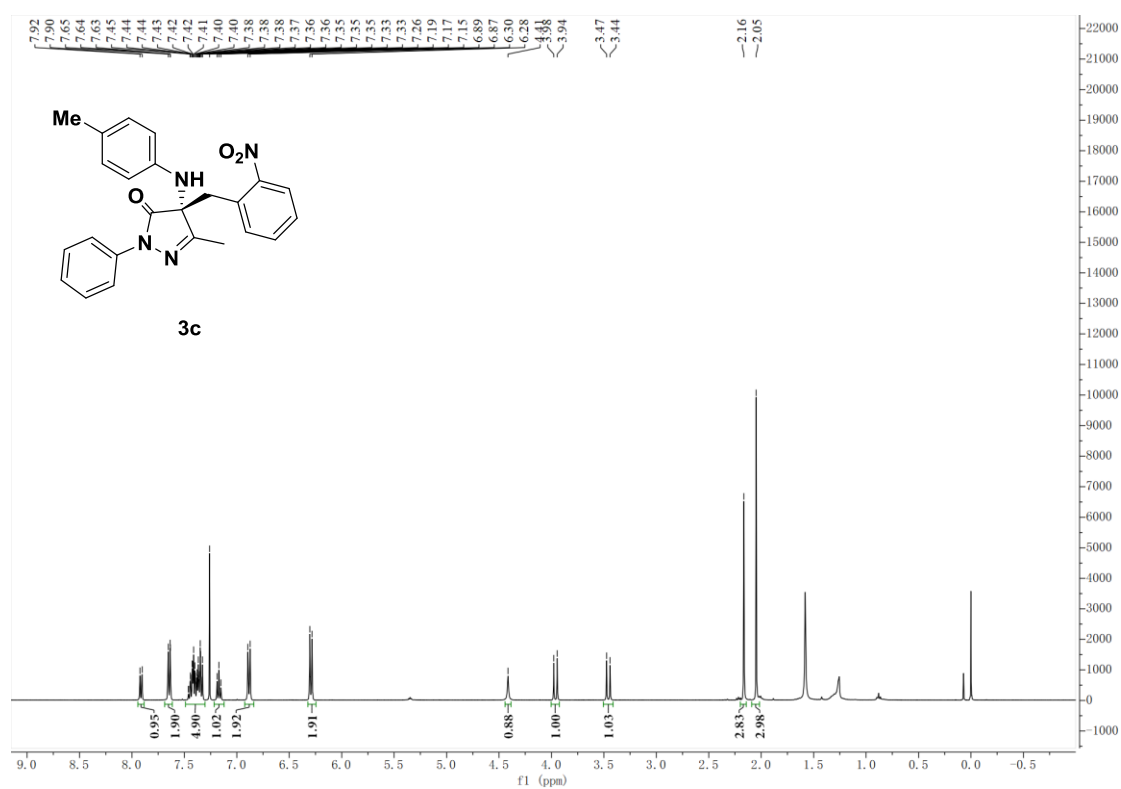

### <sup>13</sup>C NMR spectrum of compound 3c (in CDCl<sub>3</sub>)

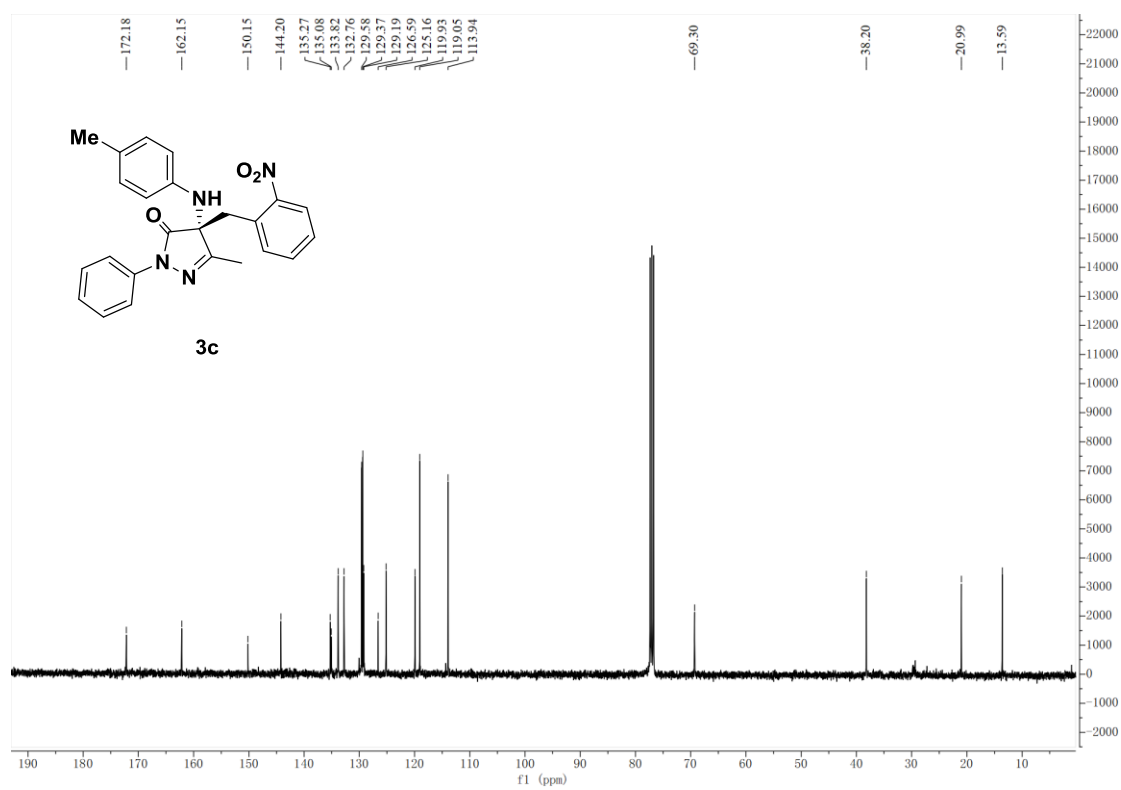

### <sup>1</sup>H NMR spectrum of compound 3d (in CDCl<sub>3</sub>)

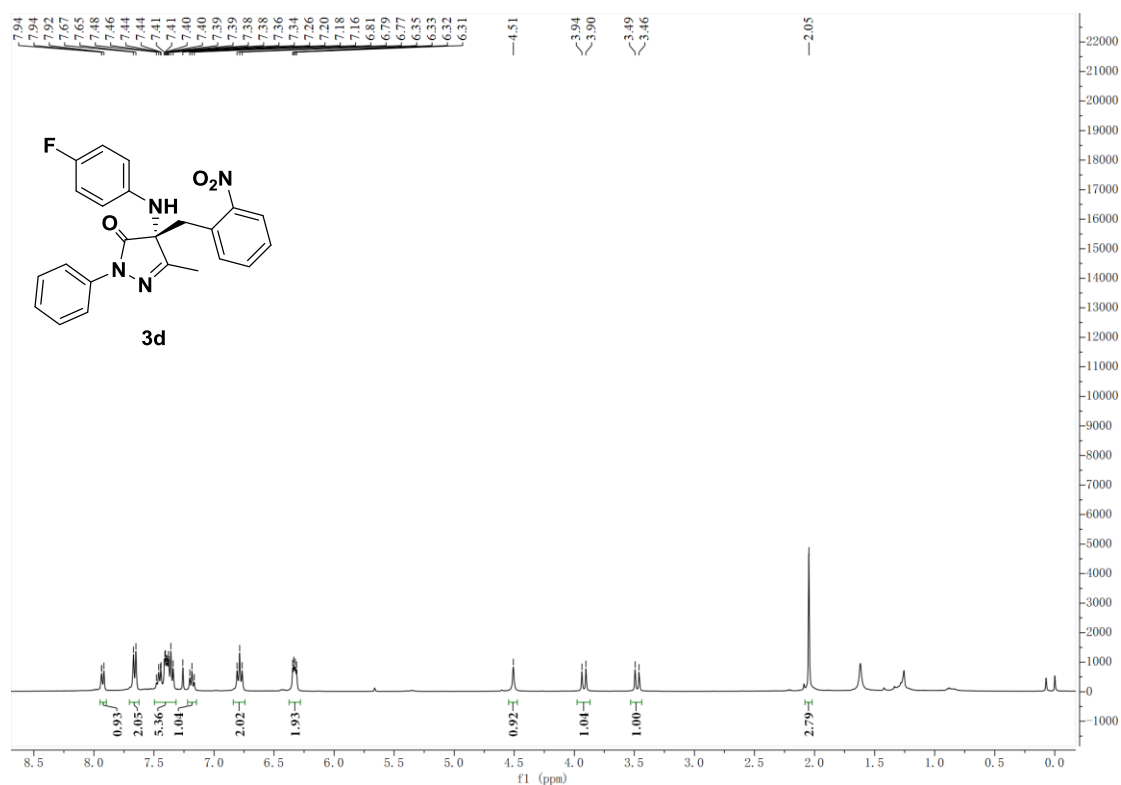

### <sup>13</sup>C NMR spectrum of compound 3d (in CDCl<sub>3</sub>)

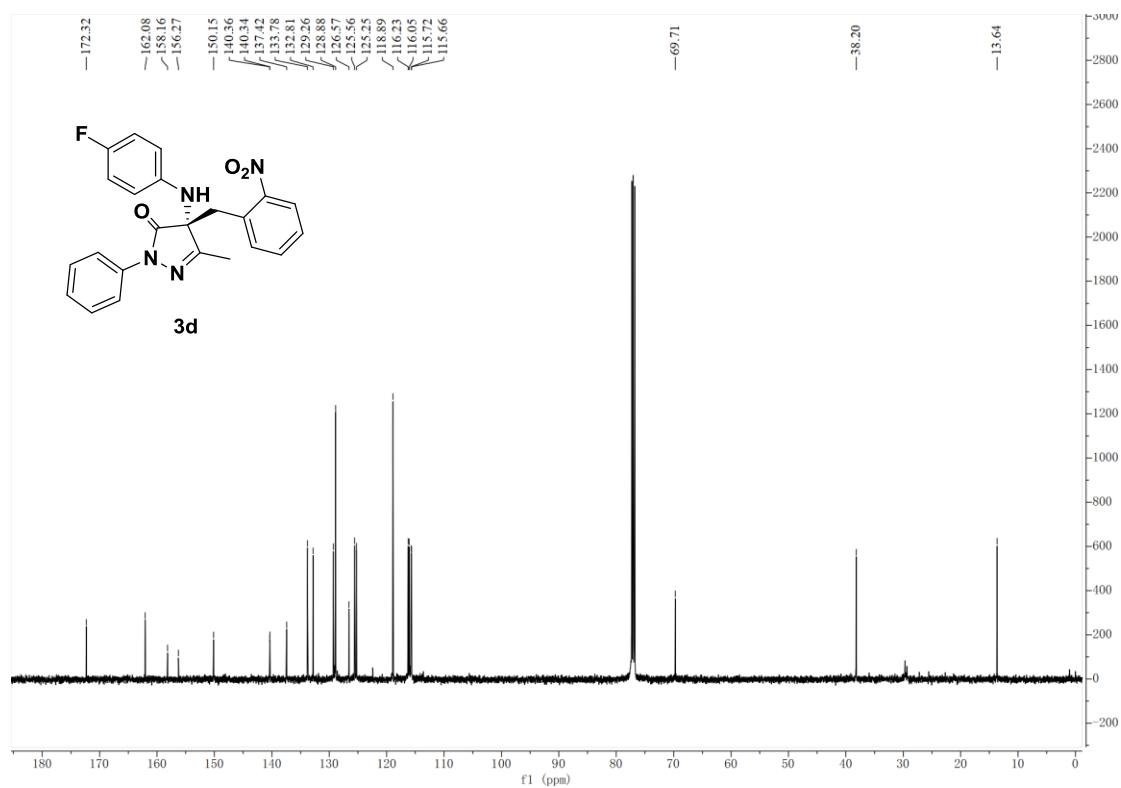

**<sup>19</sup>F NMR spectrum of compound 3d (in CDCl<sub>3</sub>)**

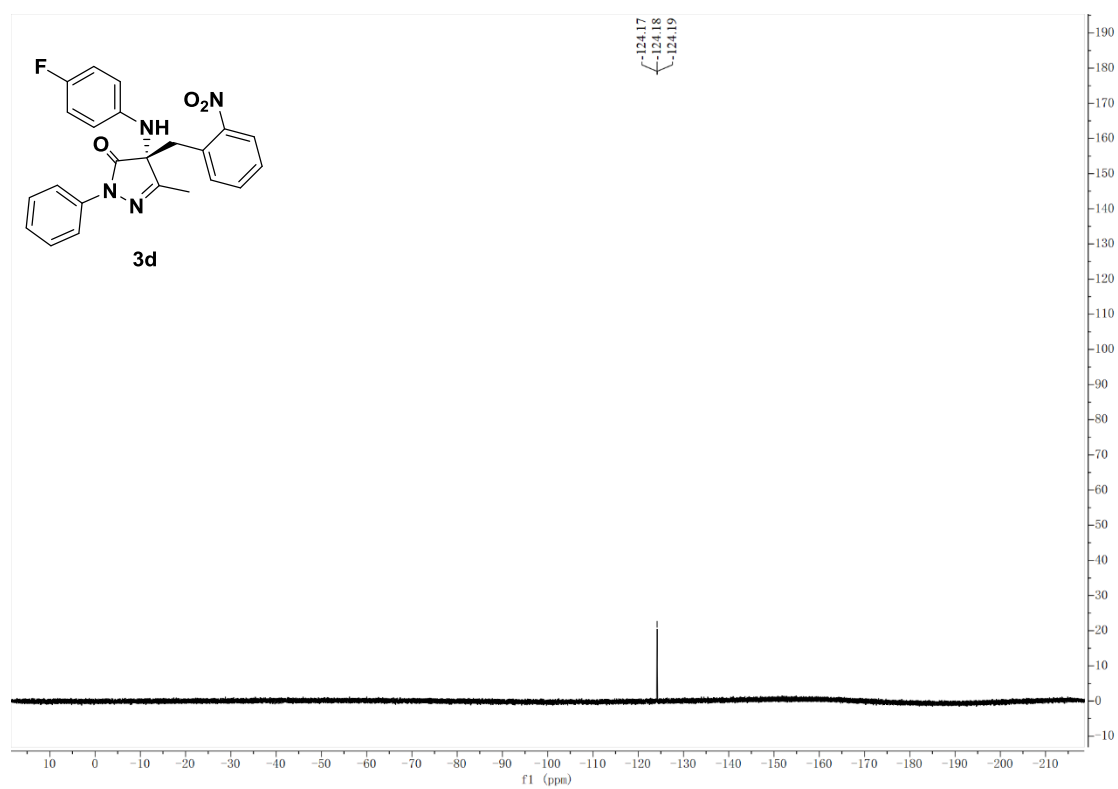

**<sup>1</sup>H NMR spectrum of compound 3e (in CDCl<sub>3</sub>)**

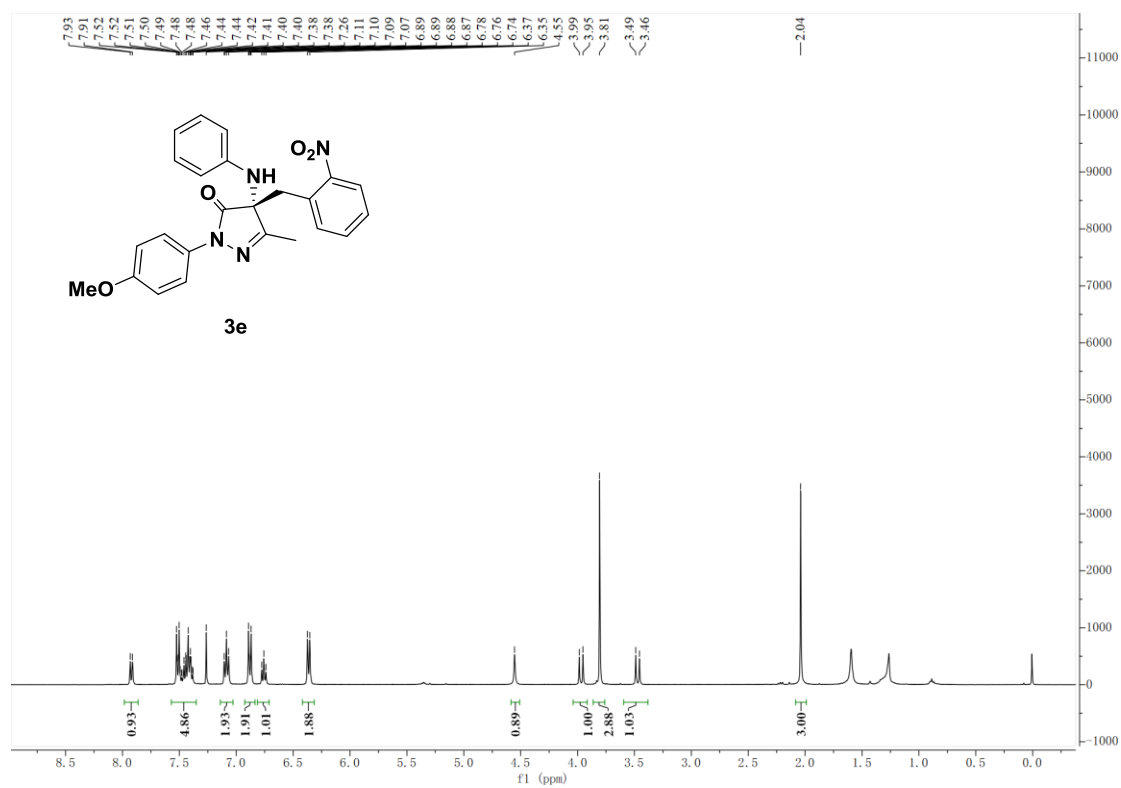

### <sup>13</sup>C NMR spectrum of compound 3e (in CDCl<sub>3</sub>)

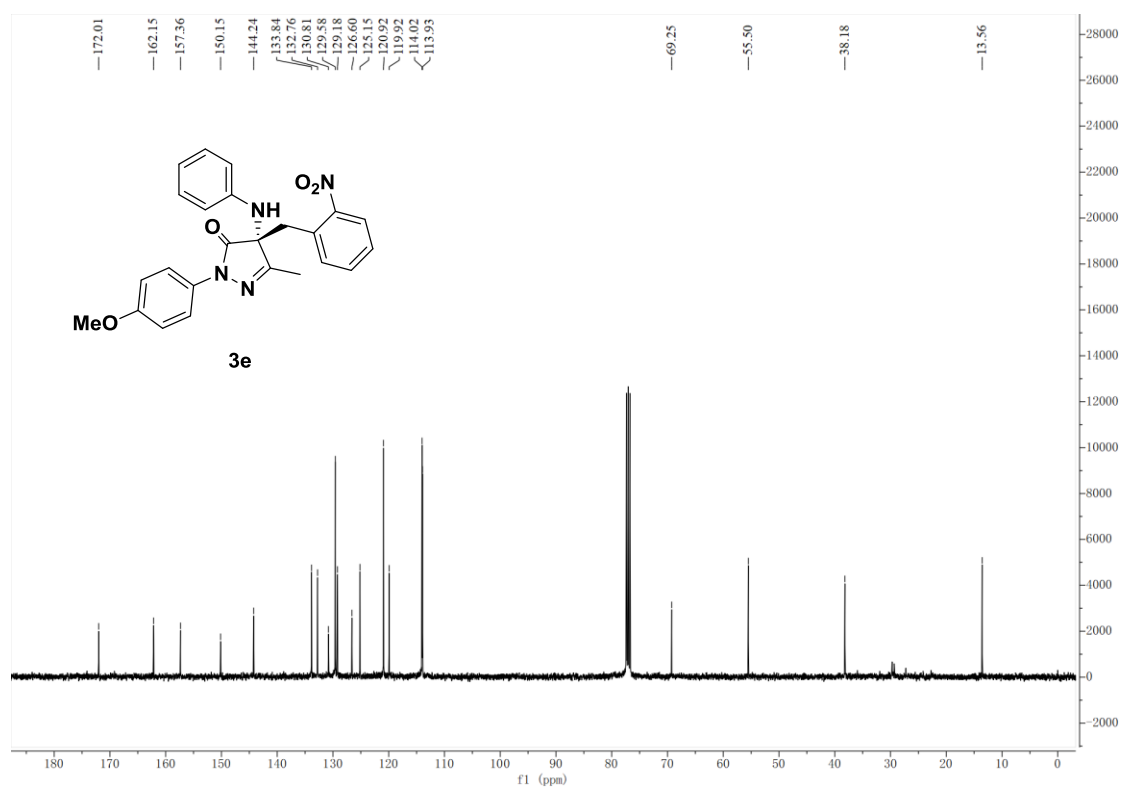

### <sup>1</sup>H NMR spectrum of compound 3f (in CDCl<sub>3</sub>)

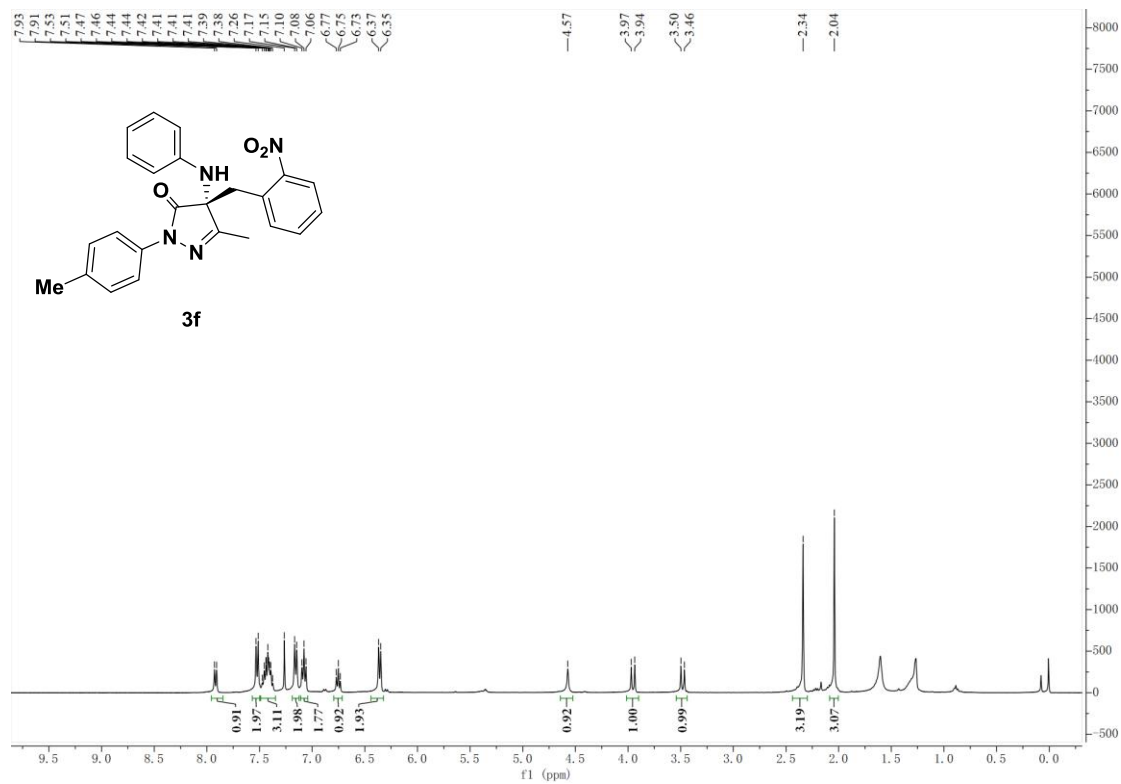

### $^{13}\text{C}$ NMR spectrum of compound 3f (in $\text{CDCl}_3$ )

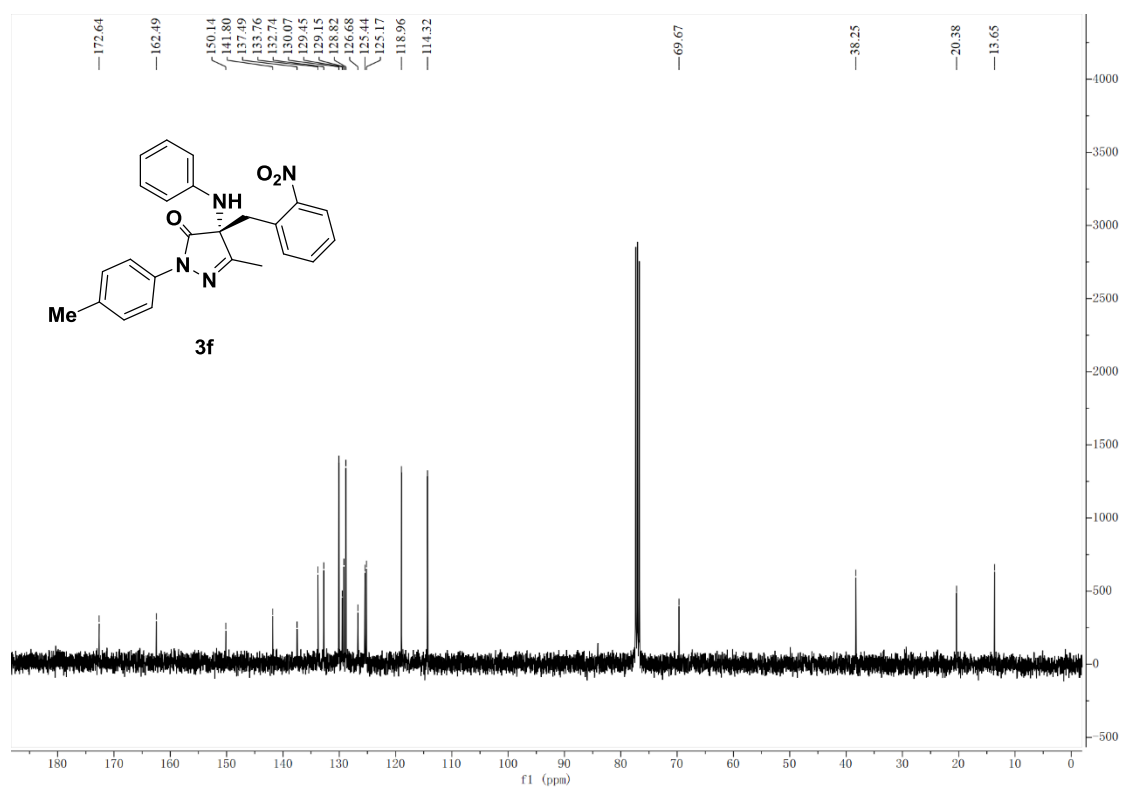

### $^1\text{H}$ NMR spectrum of compound 3g (in $\text{CDCl}_3$ )

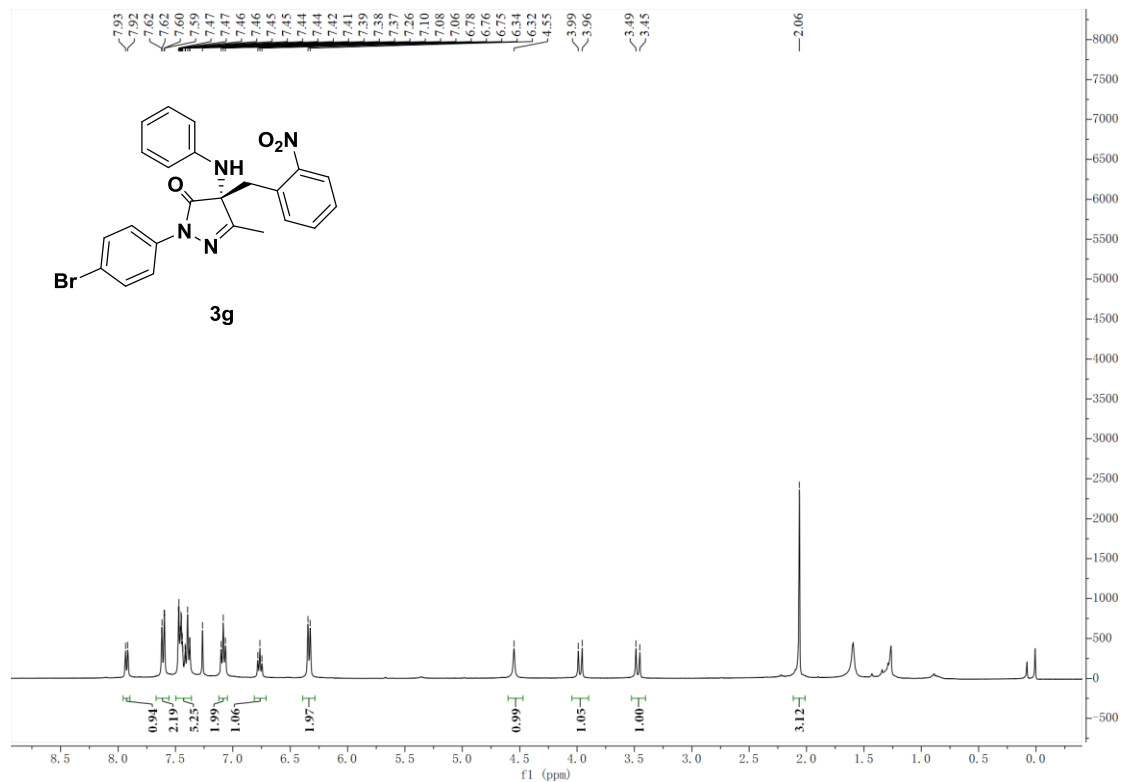

### <sup>13</sup>C NMR spectrum of compound 3g (in CDCl<sub>3</sub>)

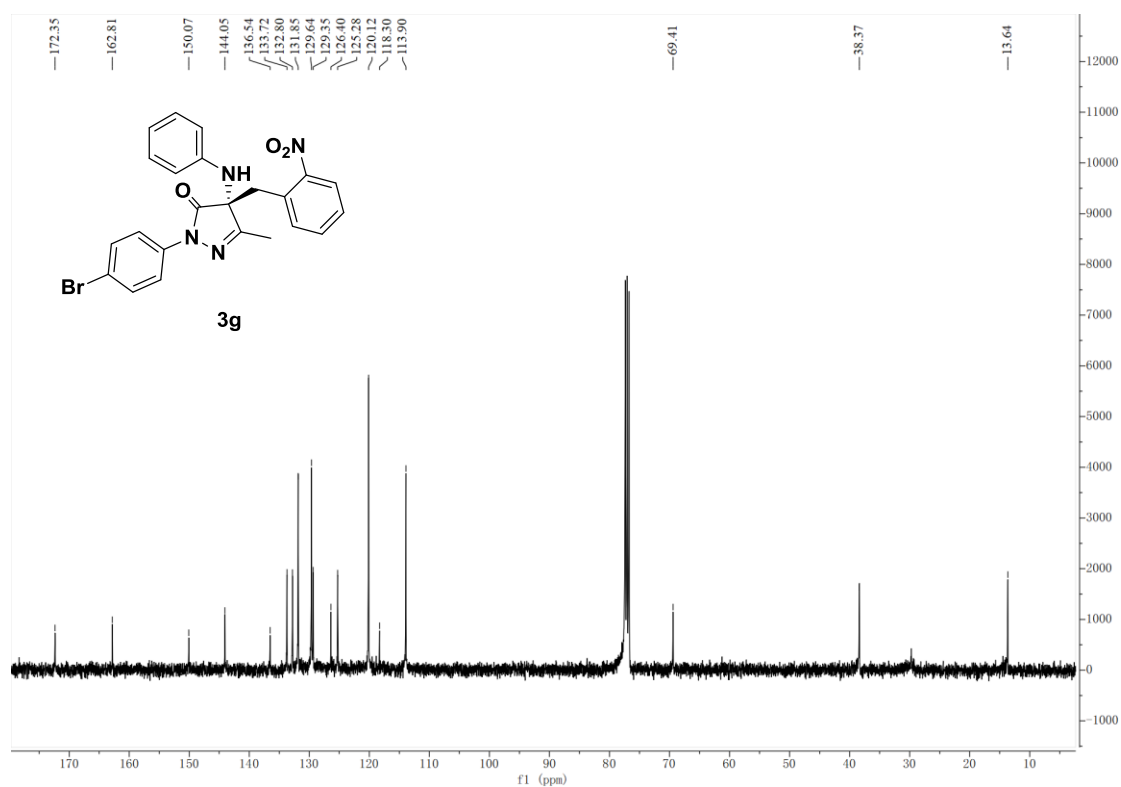

### <sup>1</sup>H NMR spectrum of compound 3h (in CDCl<sub>3</sub>)

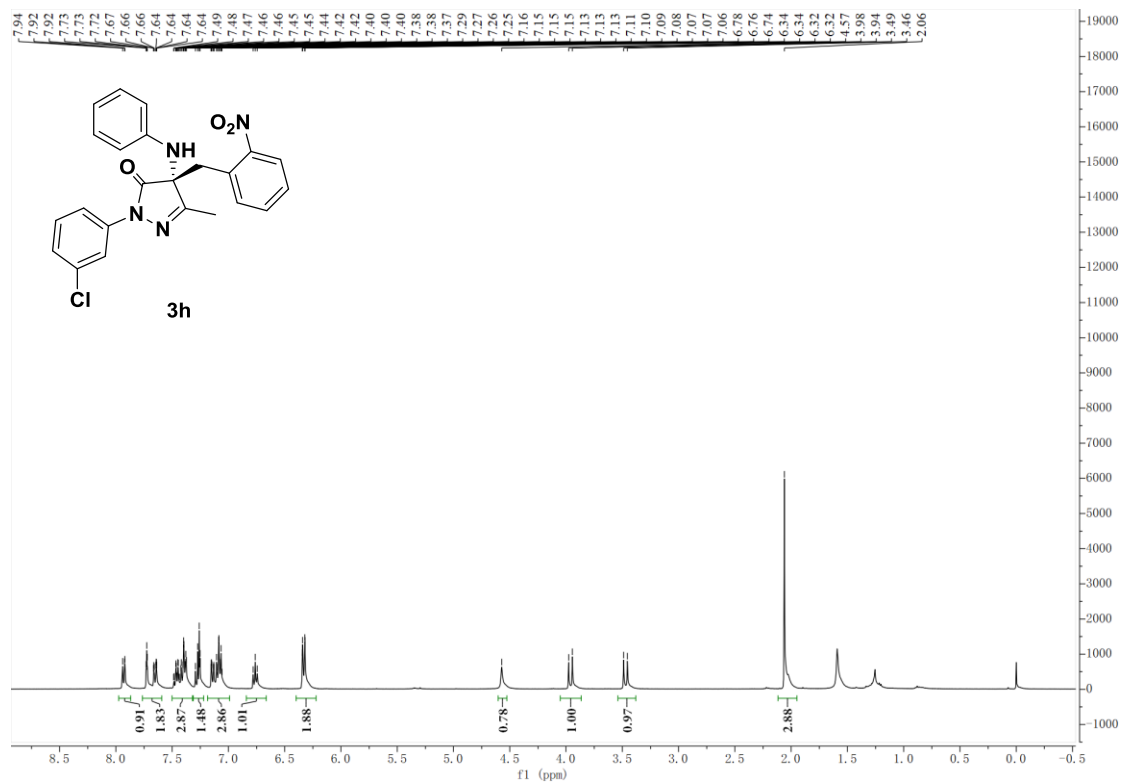

**<sup>13</sup>C NMR spectrum of compound 3h (in CDCl<sub>3</sub>)**

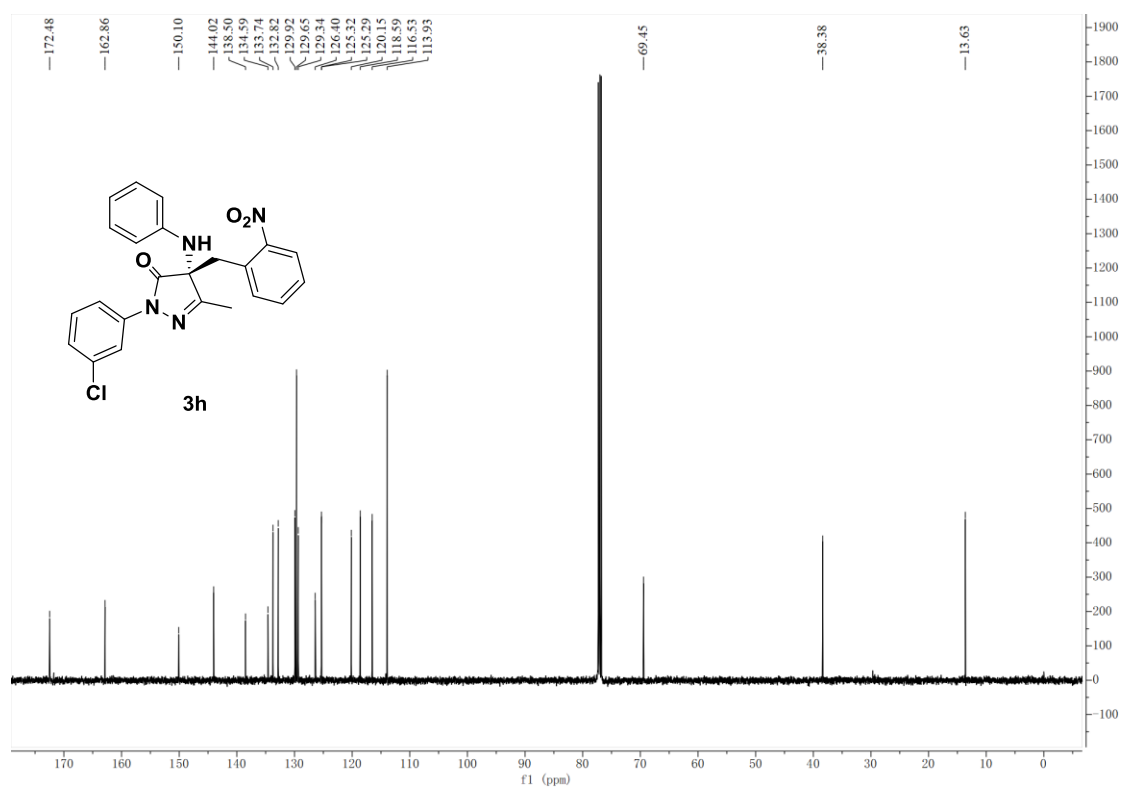

**<sup>1</sup>H NMR spectrum of compound 3i (in CDCl<sub>3</sub>)**

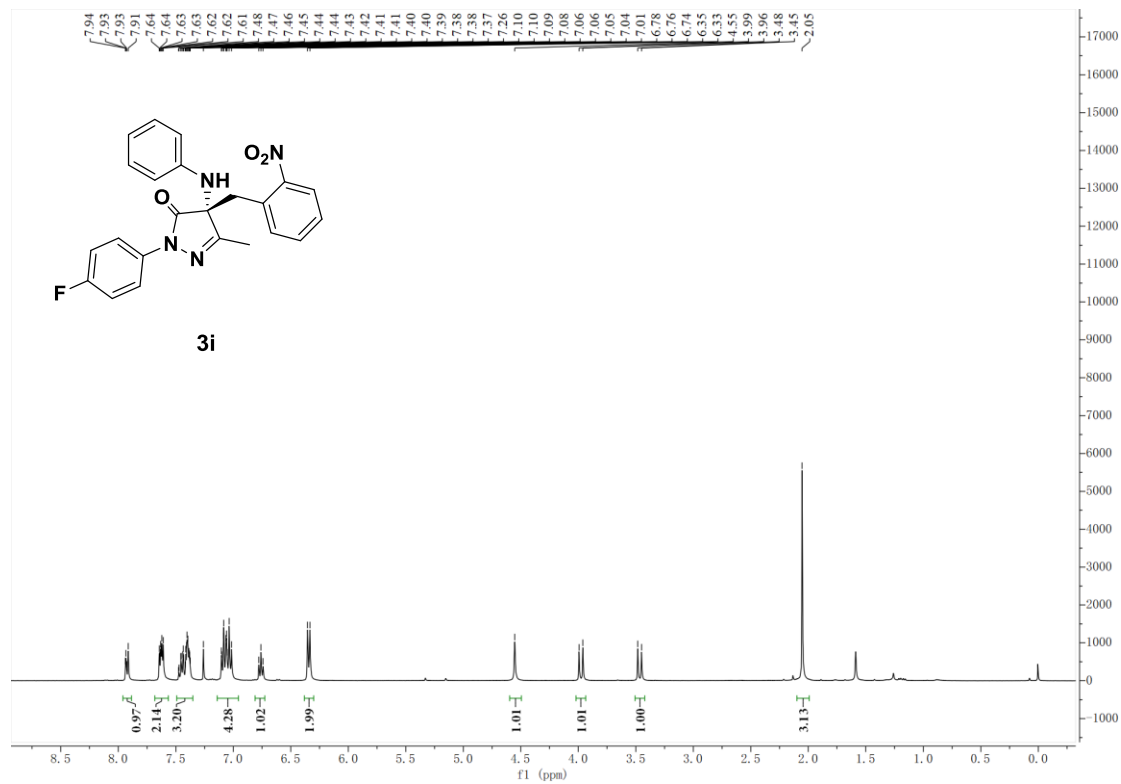



**<sup>13</sup>C NMR spectrum of compound 3i (in CDCl<sub>3</sub>)**

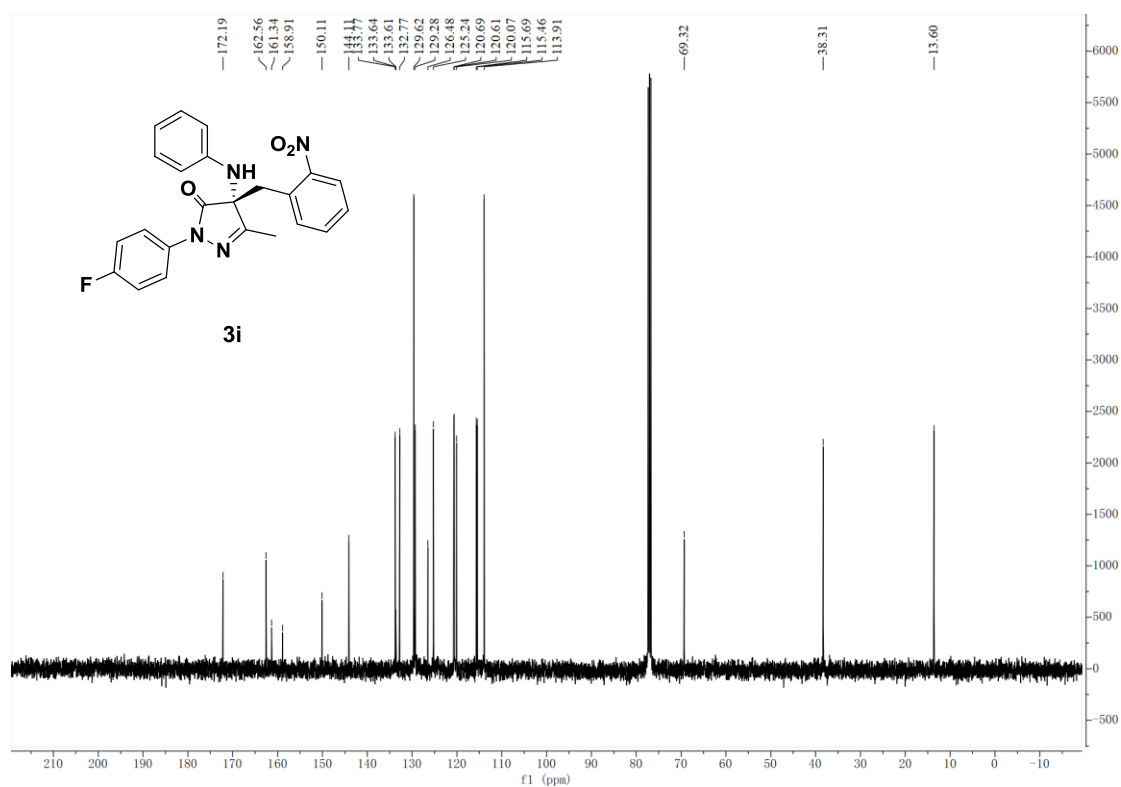

**<sup>19</sup>F NMR spectrum of compound 3i (in CDCl<sub>3</sub>)**

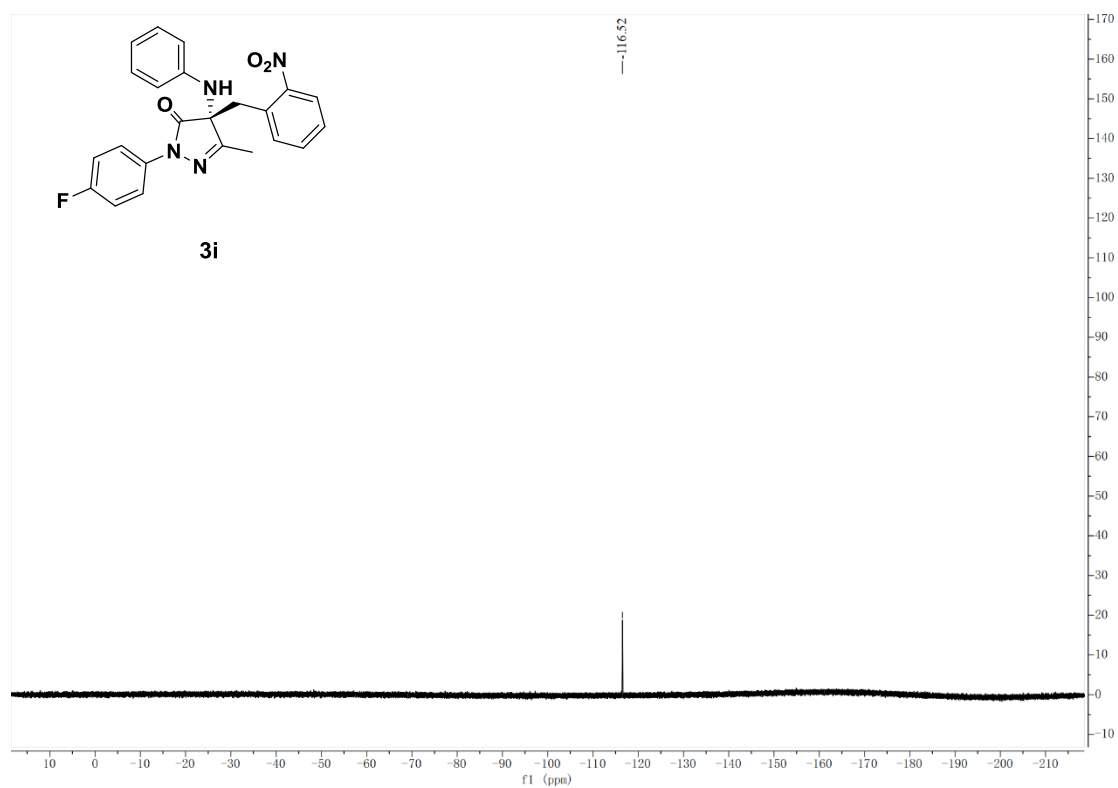

### <sup>1</sup>H NMR spectrum of compound 3j (in CDCl<sub>3</sub>)

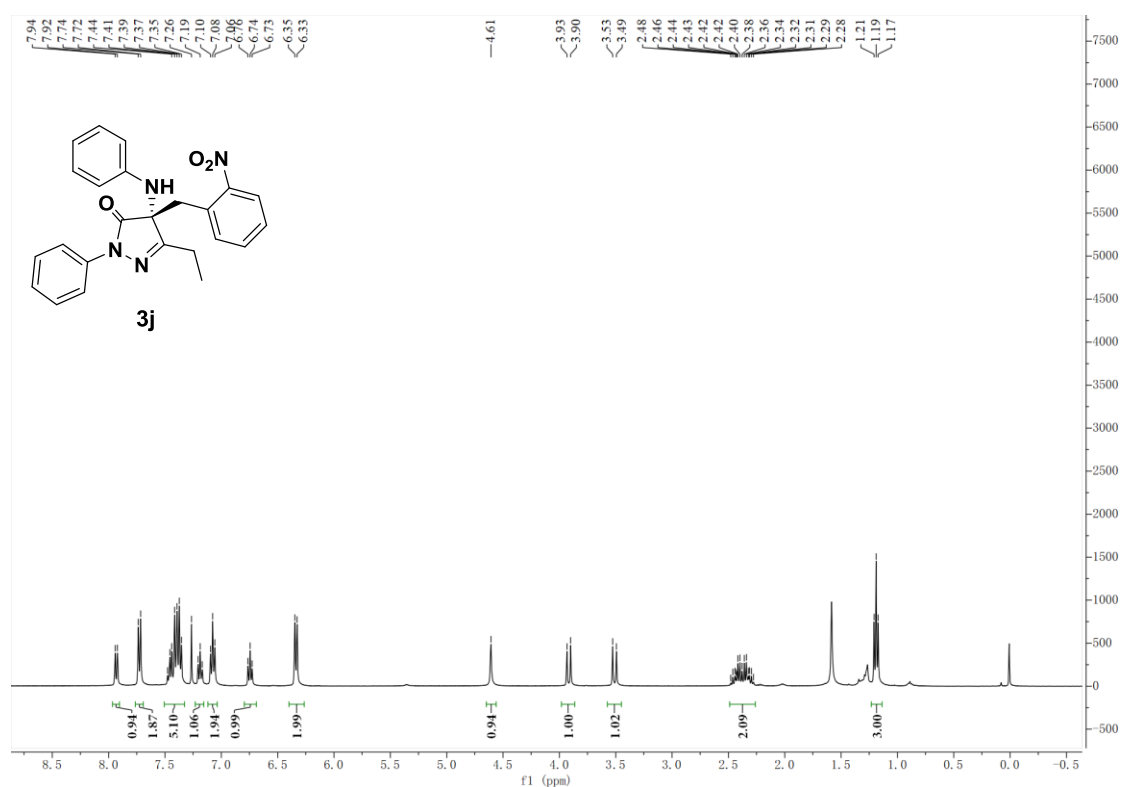

### <sup>13</sup>C NMR spectrum of compound 3j (in CDCl<sub>3</sub>)

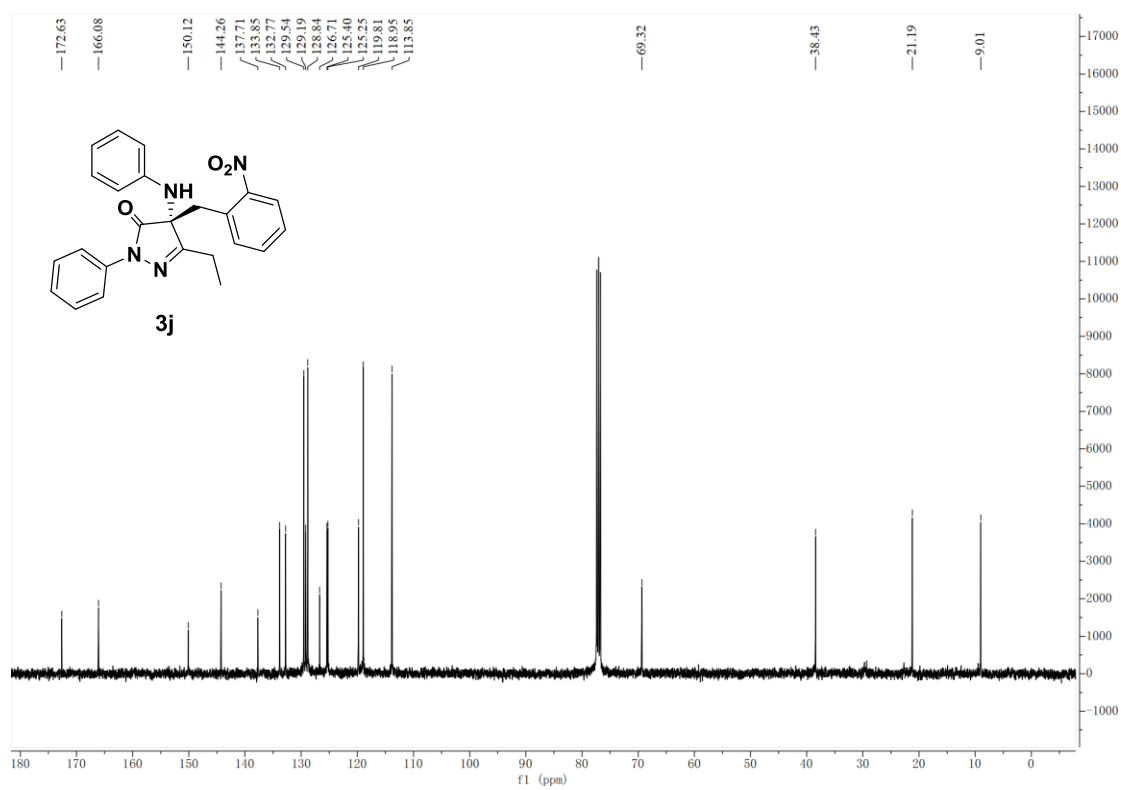

### <sup>1</sup>H NMR spectrum of compound 3k (in CDCl<sub>3</sub>)

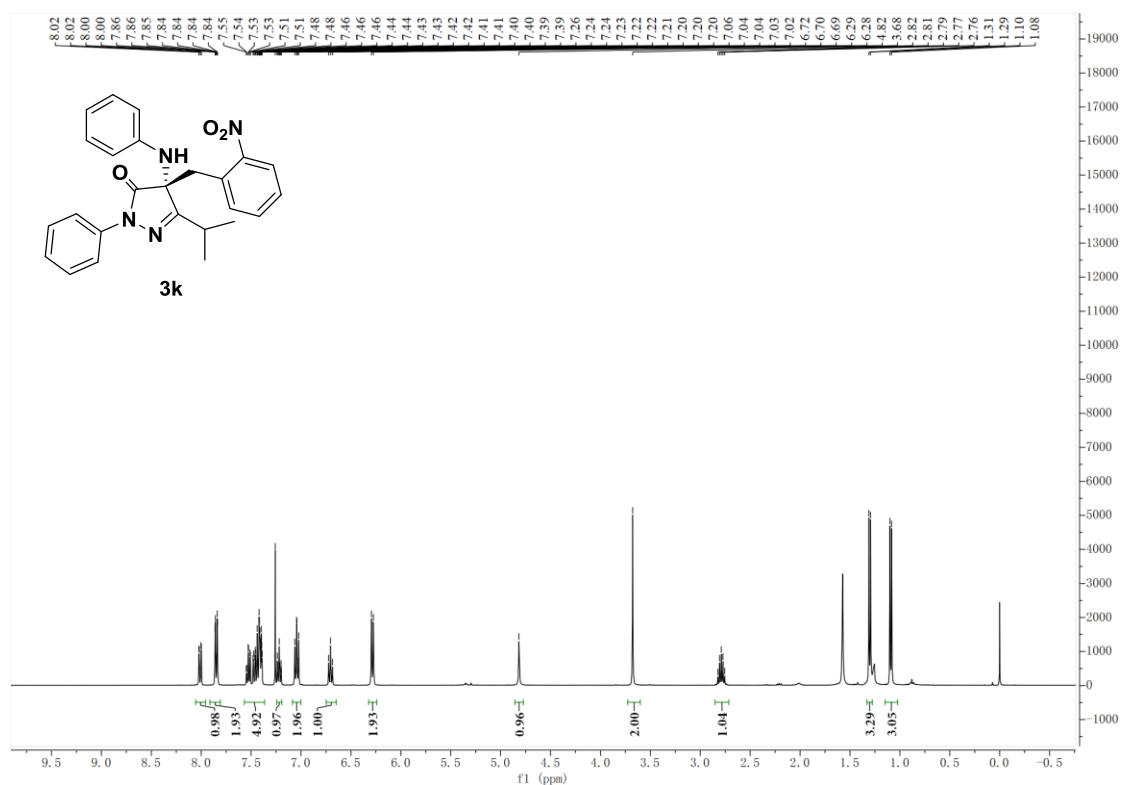

### <sup>13</sup>C NMR spectrum of compound 3k (in CDCl<sub>3</sub>)

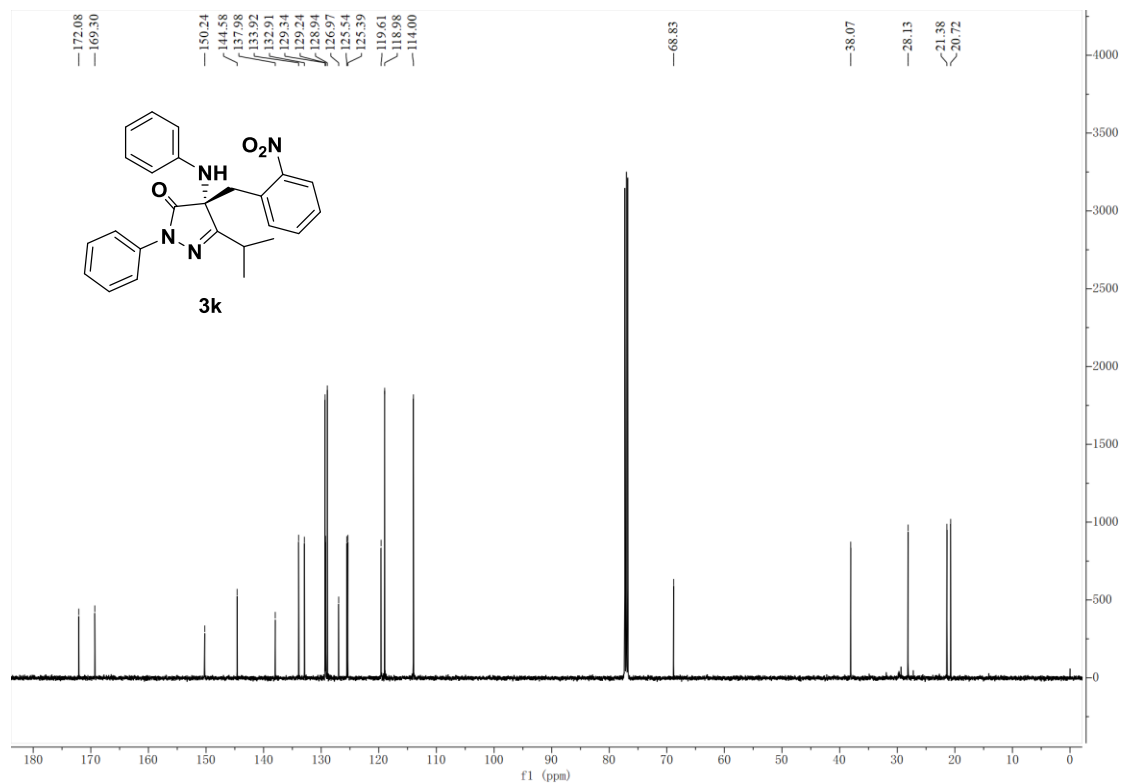

### <sup>1</sup>H NMR spectrum of compound 3I (in CDCl<sub>3</sub>)

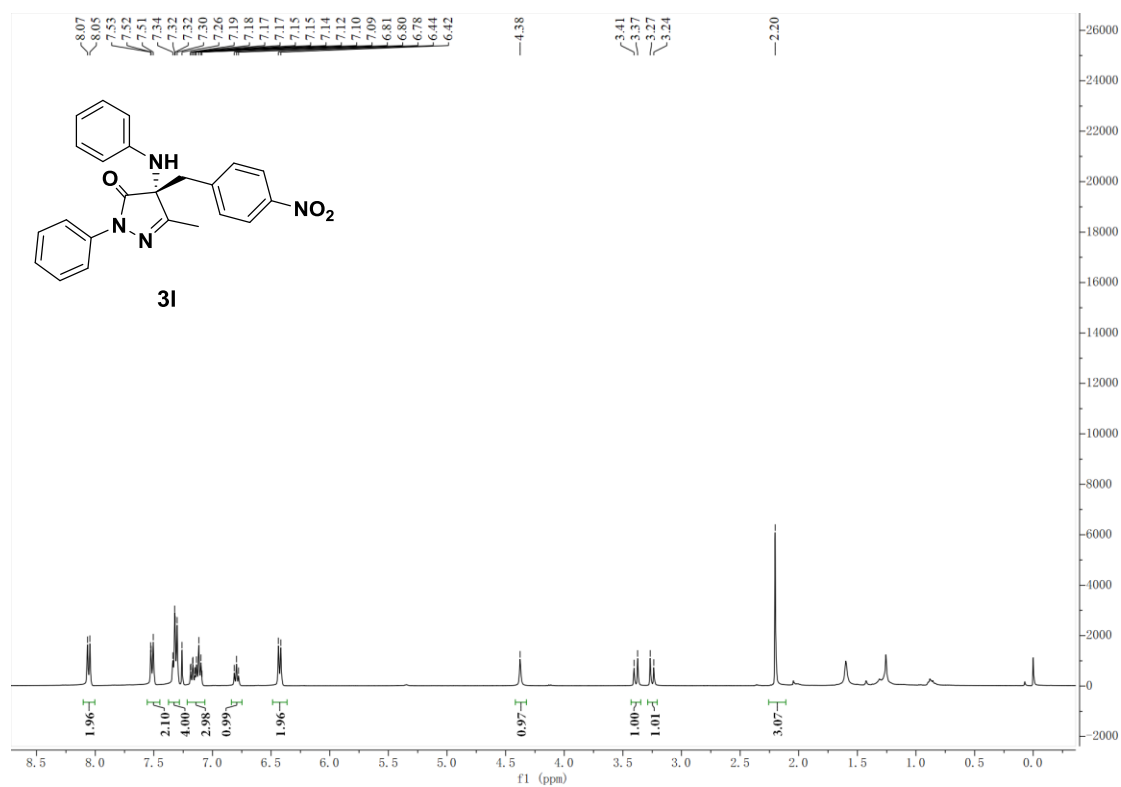

### <sup>13</sup>C NMR spectrum of compound 3I (in CDCl<sub>3</sub>)

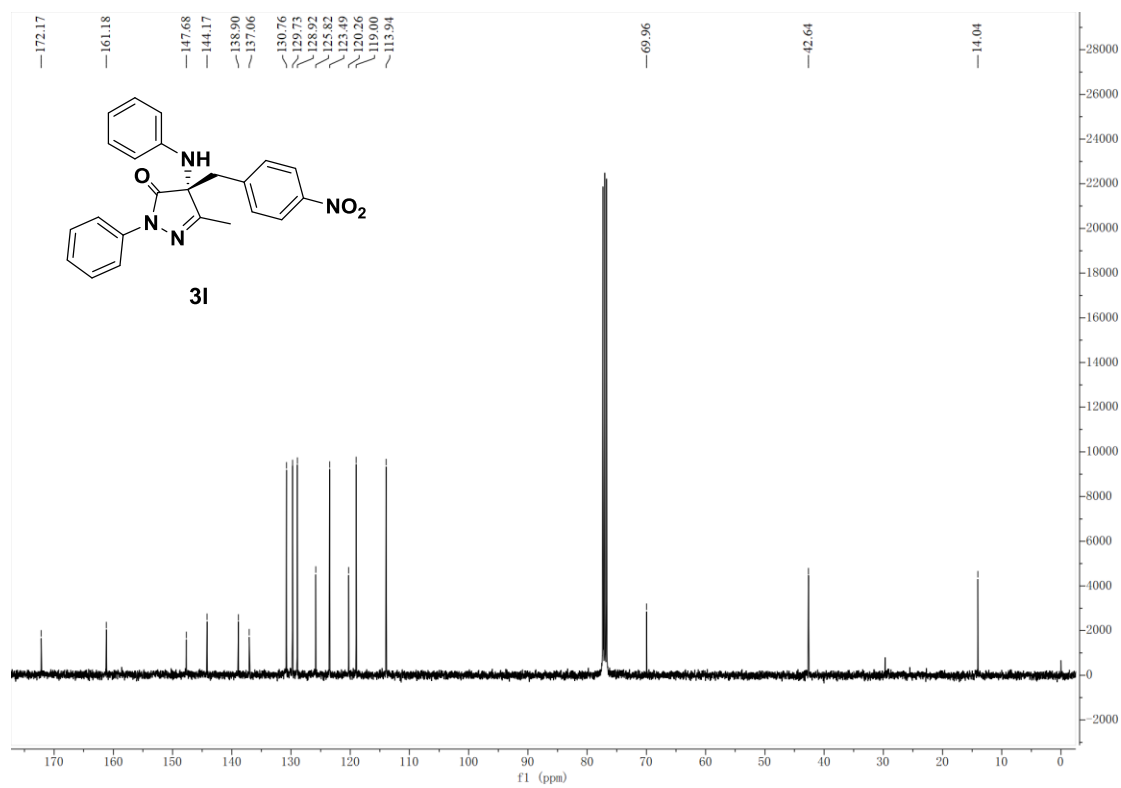

### <sup>1</sup>H NMR spectrum of compound 3m (in CDCl<sub>3</sub>)

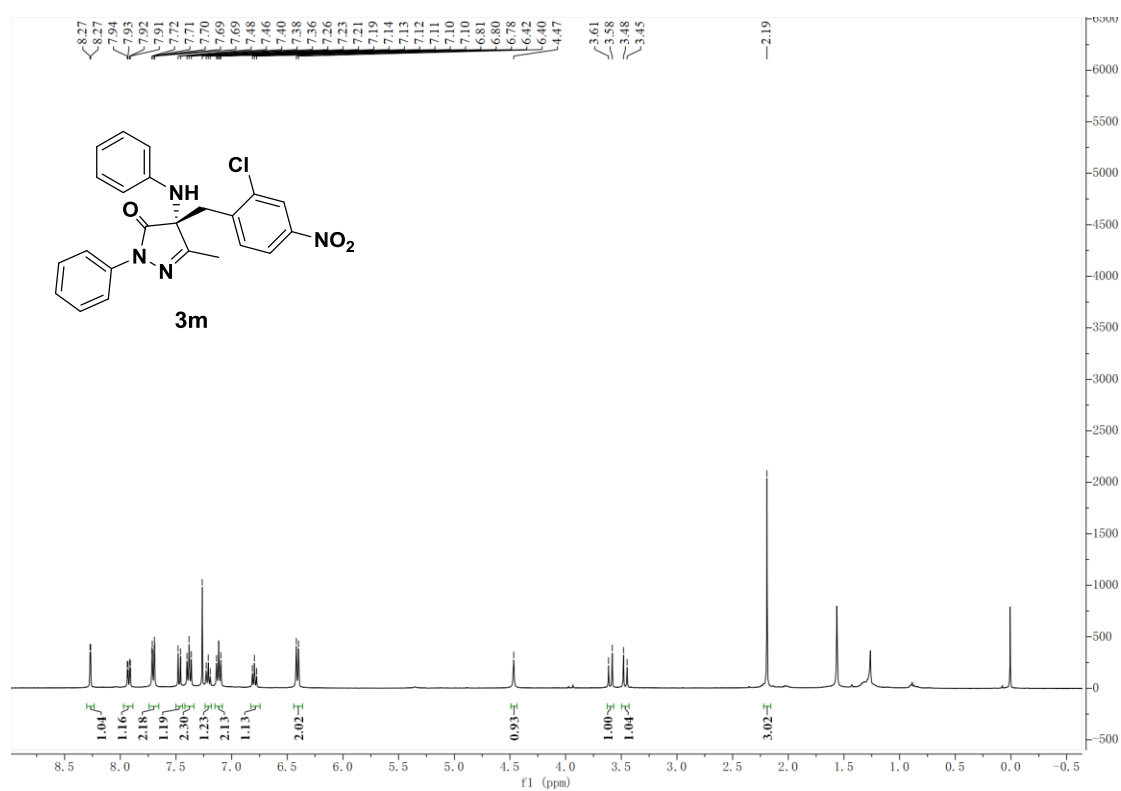

### <sup>13</sup>C NMR spectrum of compound 3m (in CDCl<sub>3</sub>)

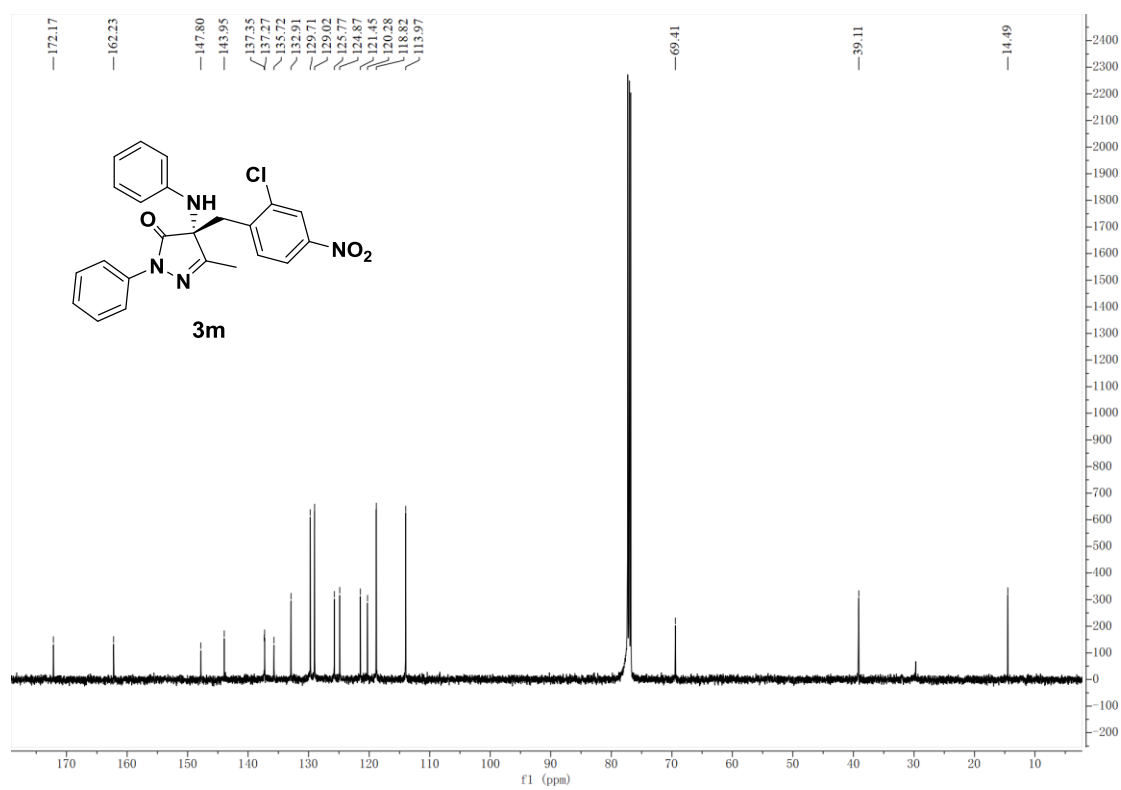

### <sup>1</sup>H NMR spectrum of compound 3n (in CDCl<sub>3</sub>)

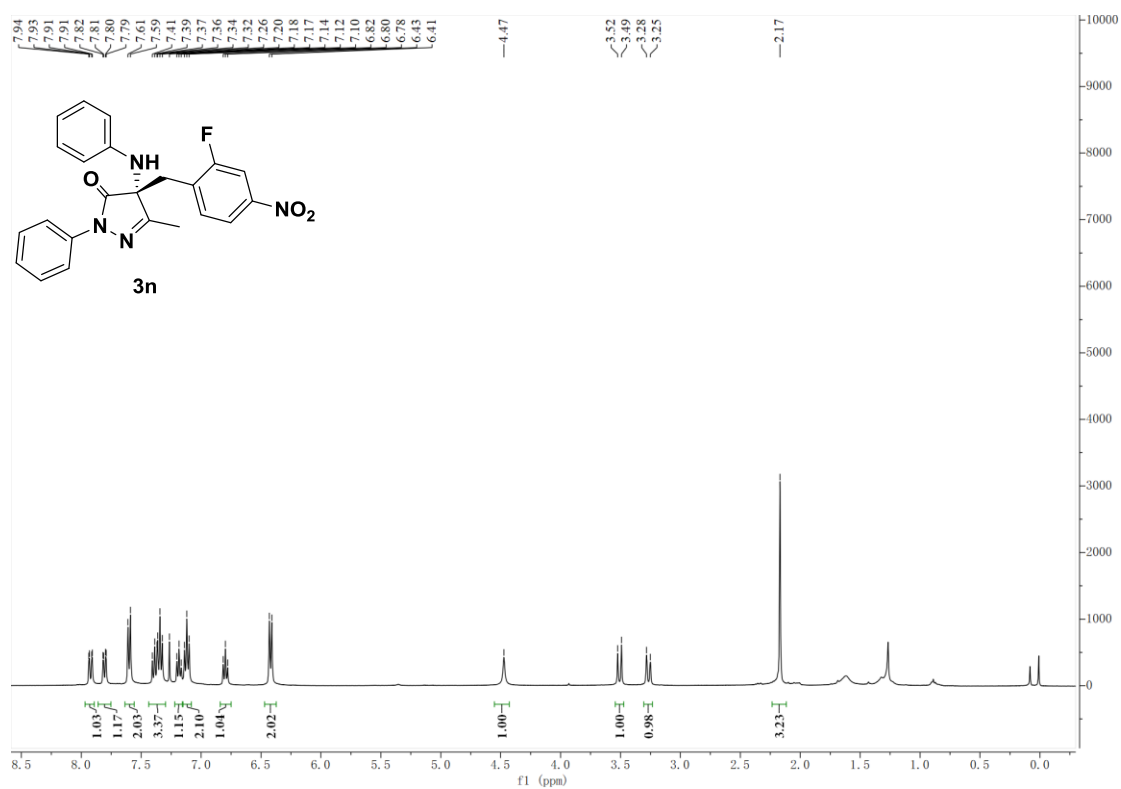

### <sup>13</sup>C NMR spectrum of compound 3n (in CDCl<sub>3</sub>)

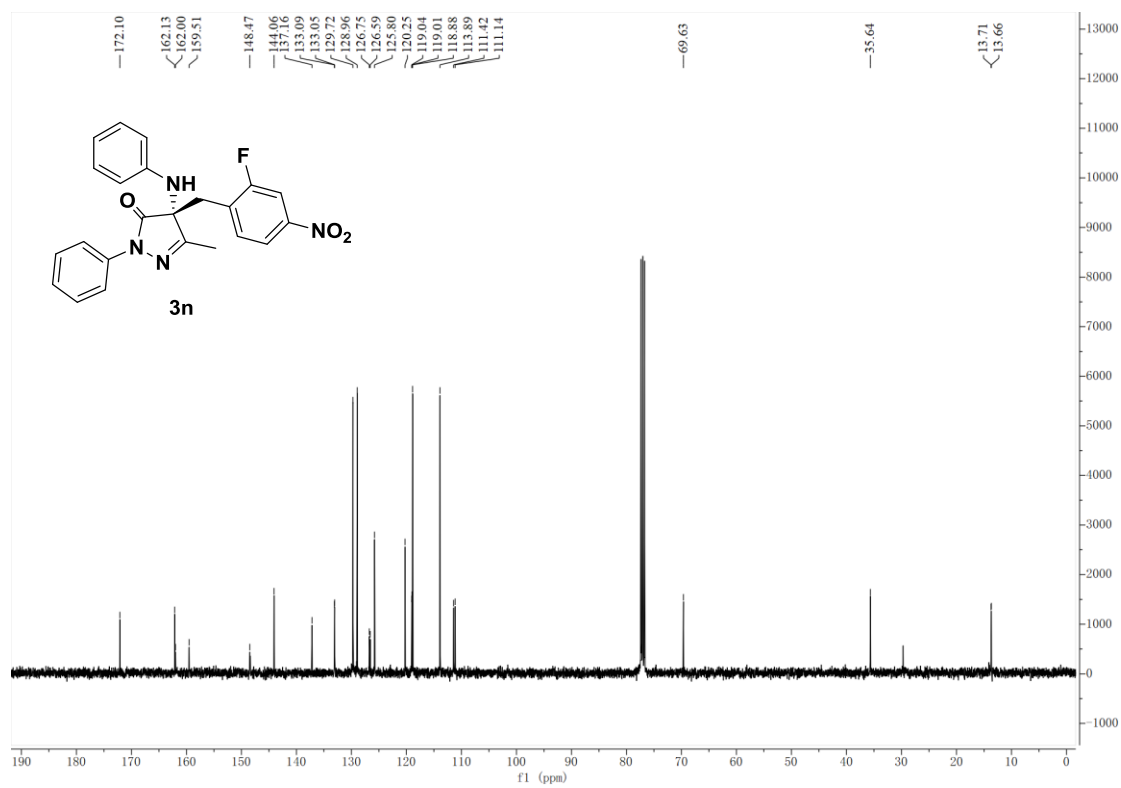

**<sup>19</sup>F NMR spectrum of compound 3n (in CDCl<sub>3</sub>)**

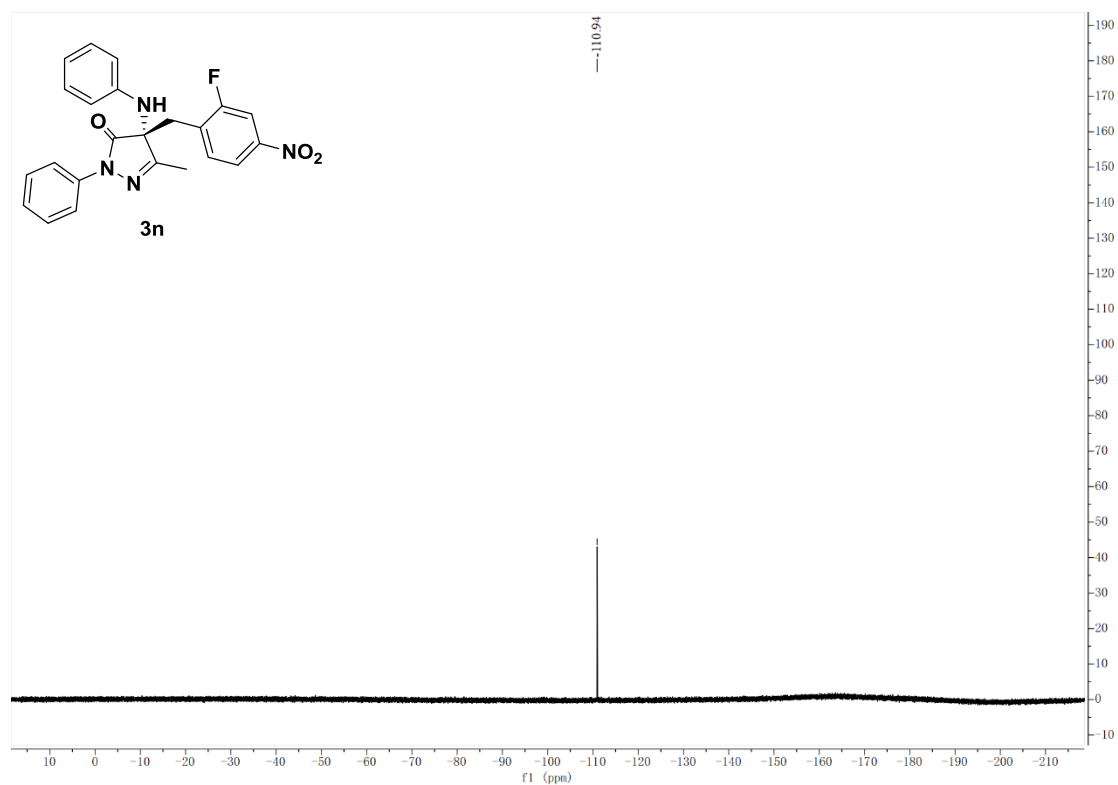

**<sup>1</sup>H NMR spectrum of compound 3o (in CDCl<sub>3</sub>)**

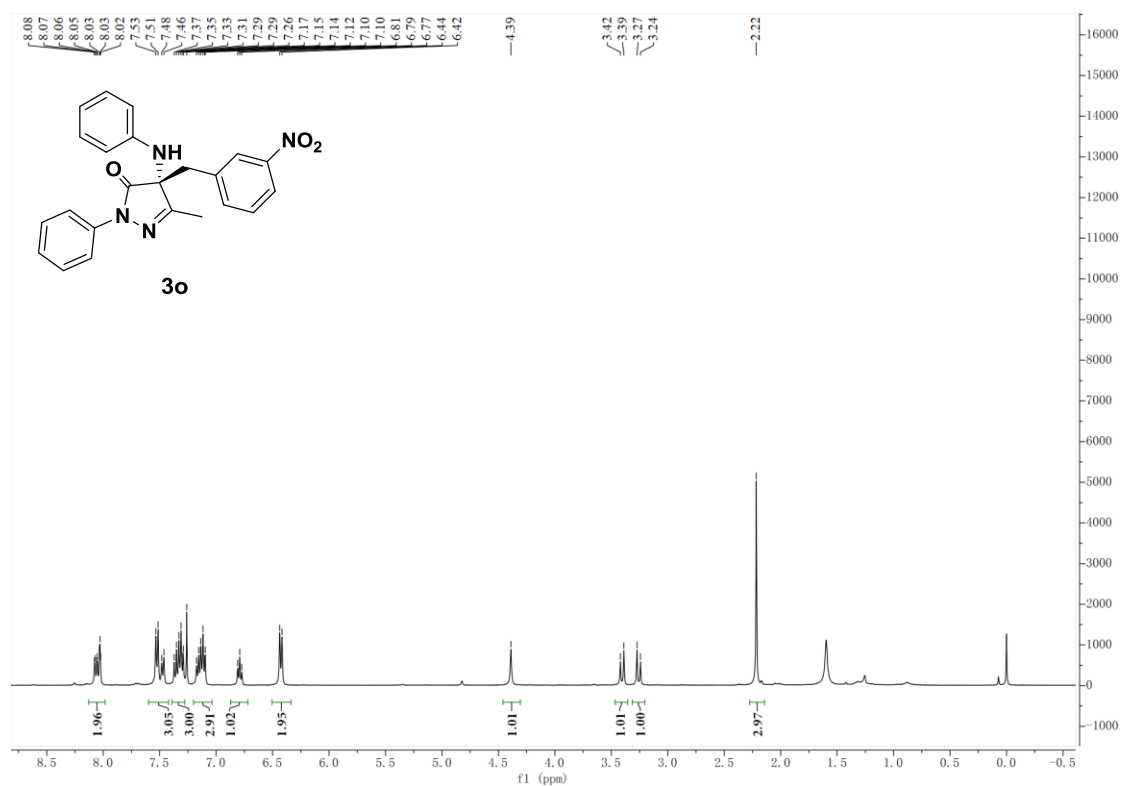

### <sup>13</sup>C NMR spectrum of compound 3o (in CDCl<sub>3</sub>)

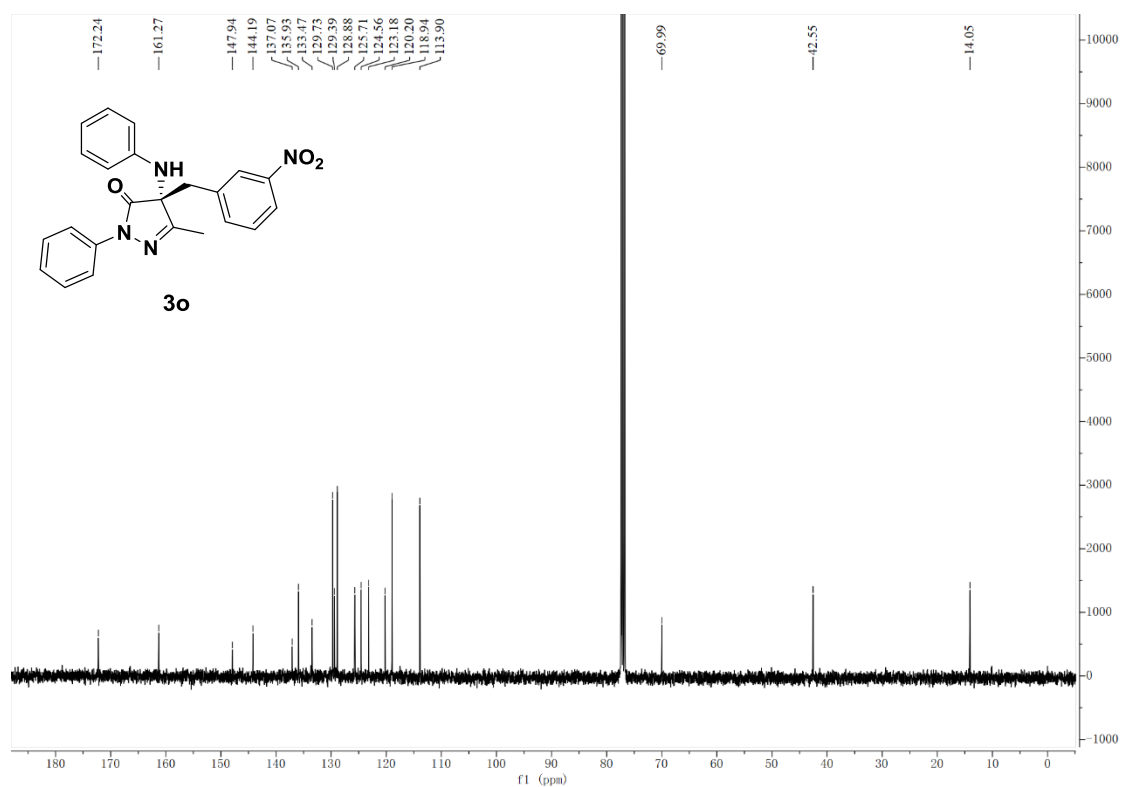

### <sup>1</sup>H NMR spectrum of compound 3p (in CDCl<sub>3</sub>)

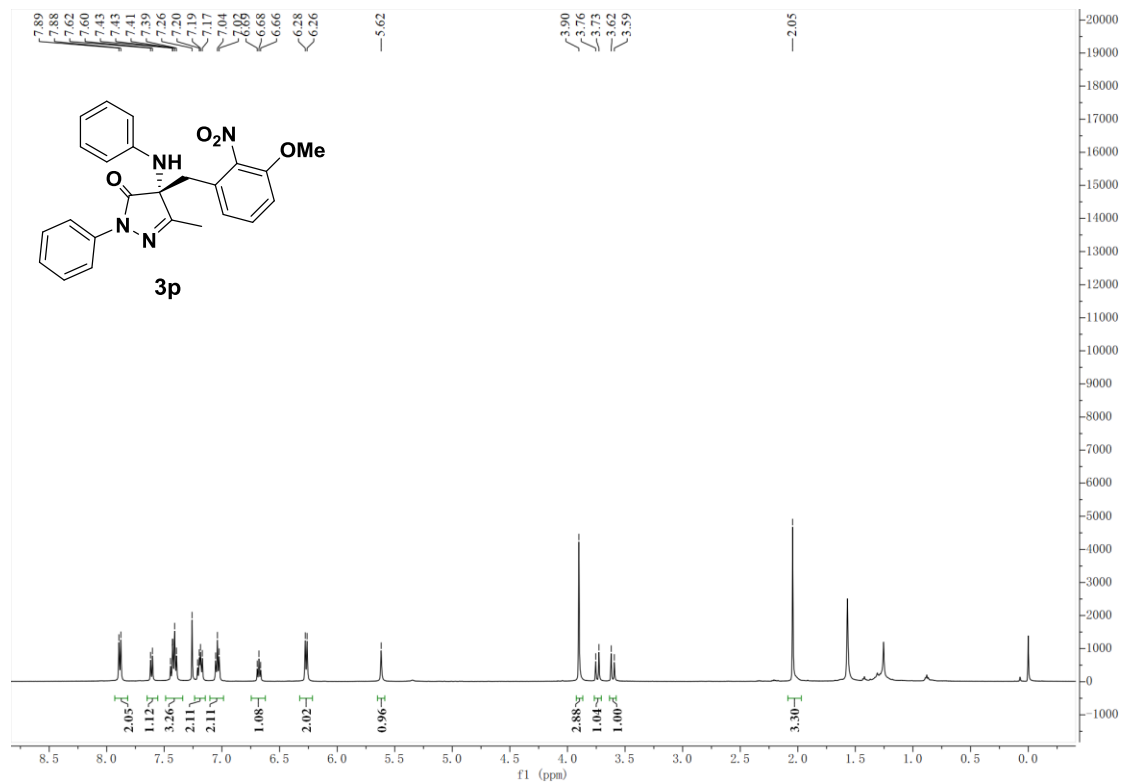



### <sup>13</sup>C NMR spectrum of compound 3p (in CDCl<sub>3</sub>)

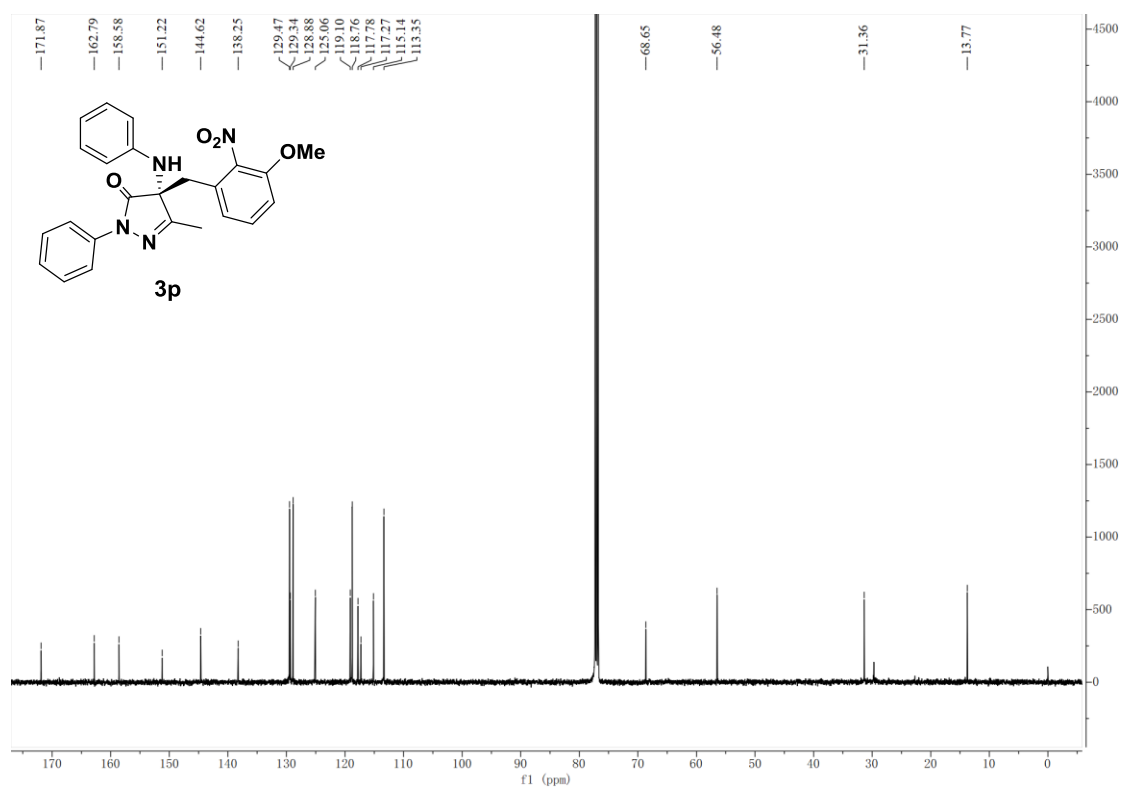

### <sup>1</sup>H NMR spectrum of compound 3q (in CDCl<sub>3</sub>)

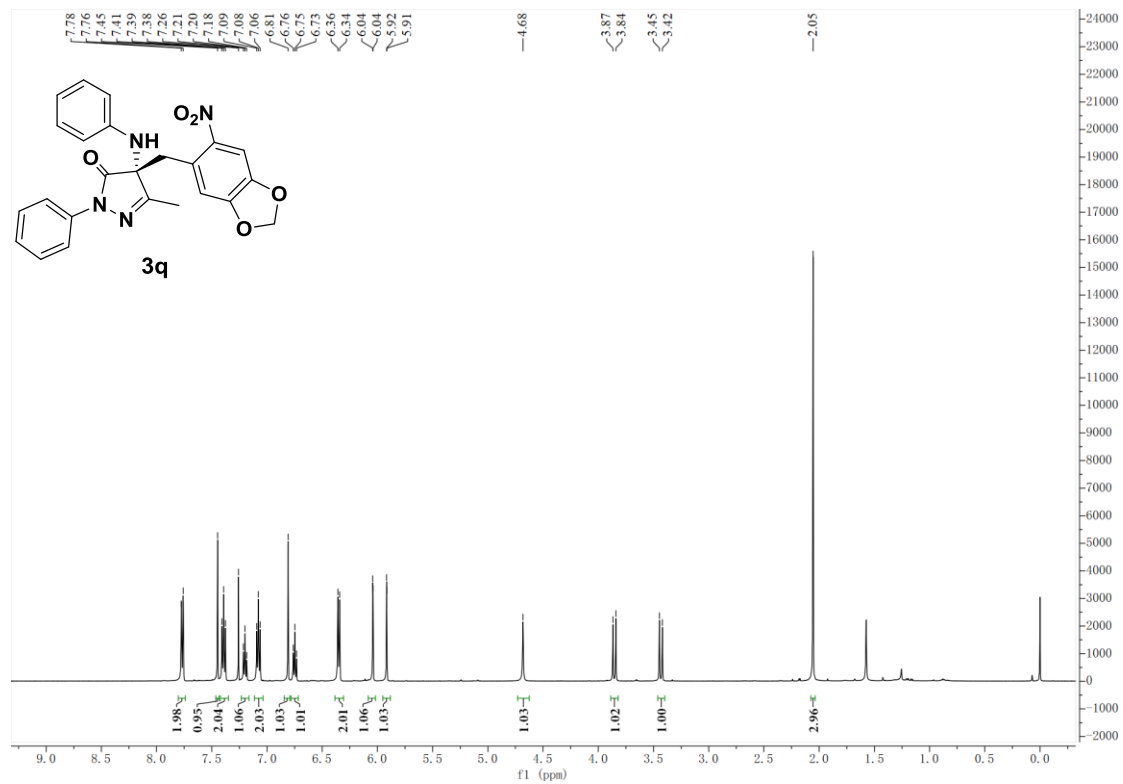

### <sup>13</sup>C NMR spectrum of compound 3q (in CDCl<sub>3</sub>)

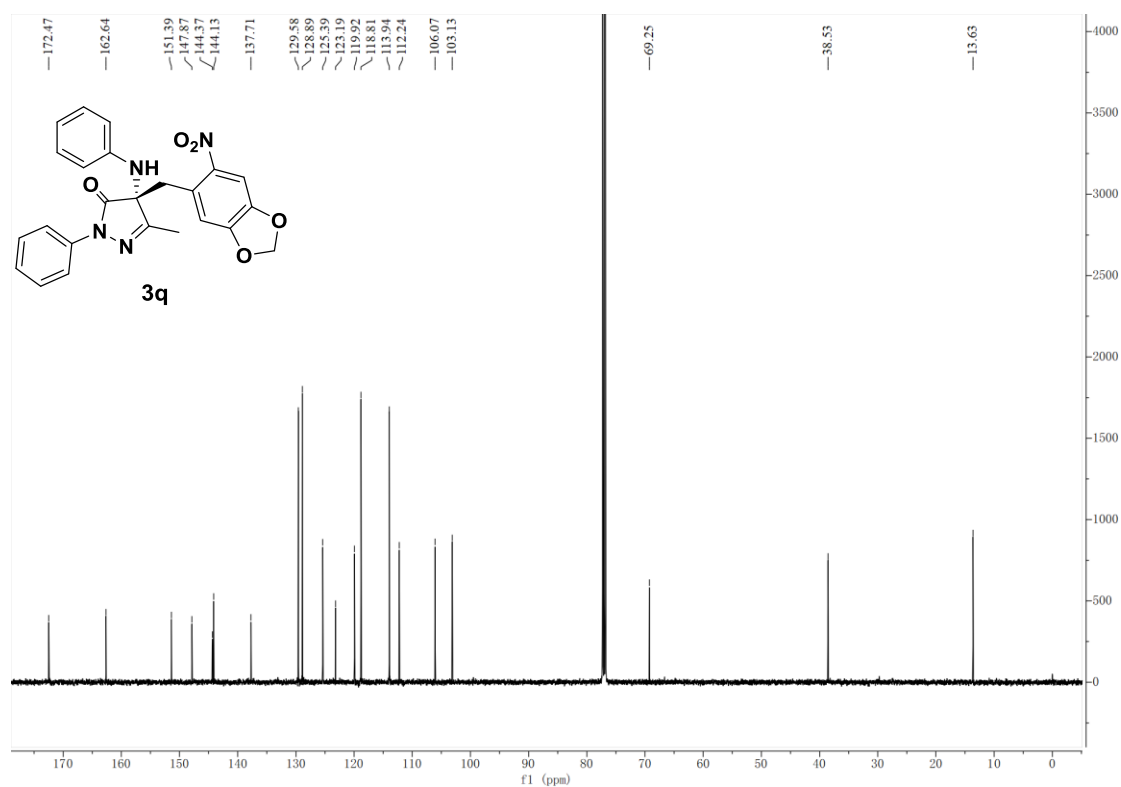

### <sup>1</sup>H NMR spectrum of compound 3r (in CDCl<sub>3</sub>)

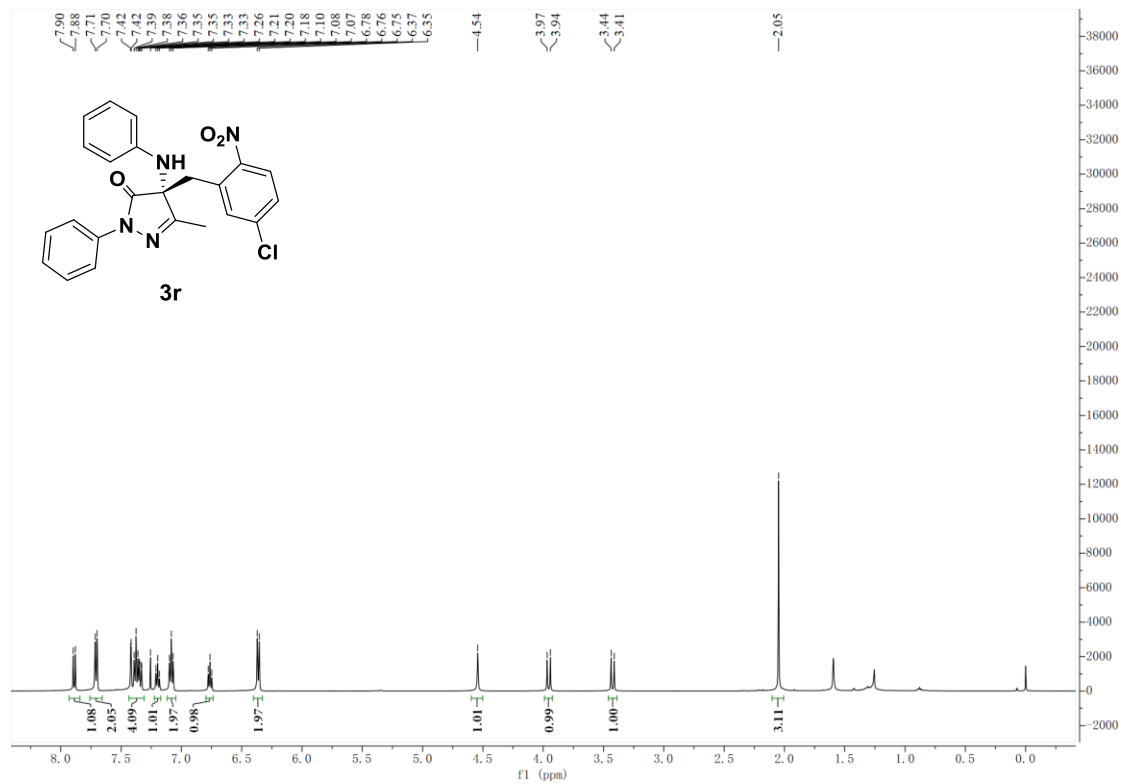

### $^{13}\text{C}$ NMR spectrum of compound 3r (in $\text{CDCl}_3$ )

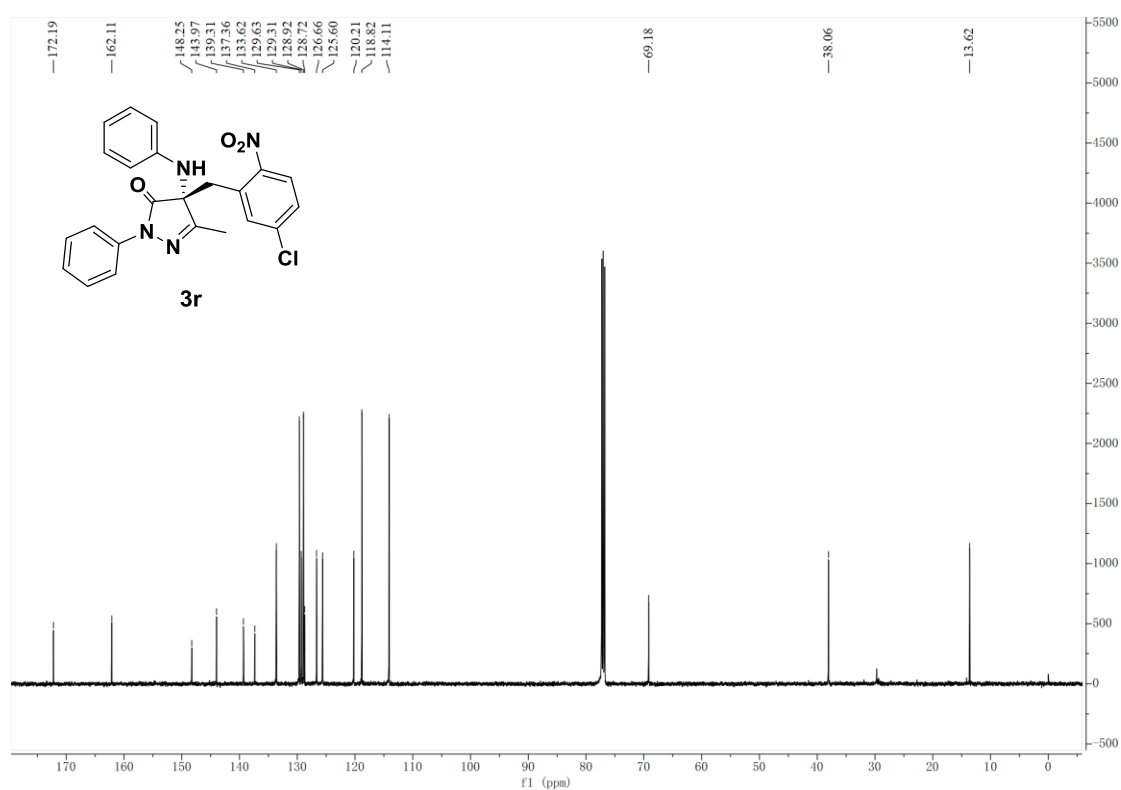

### $^1\text{H}$ NMR spectrum of compound 3s (in $\text{CDCl}_3$ )

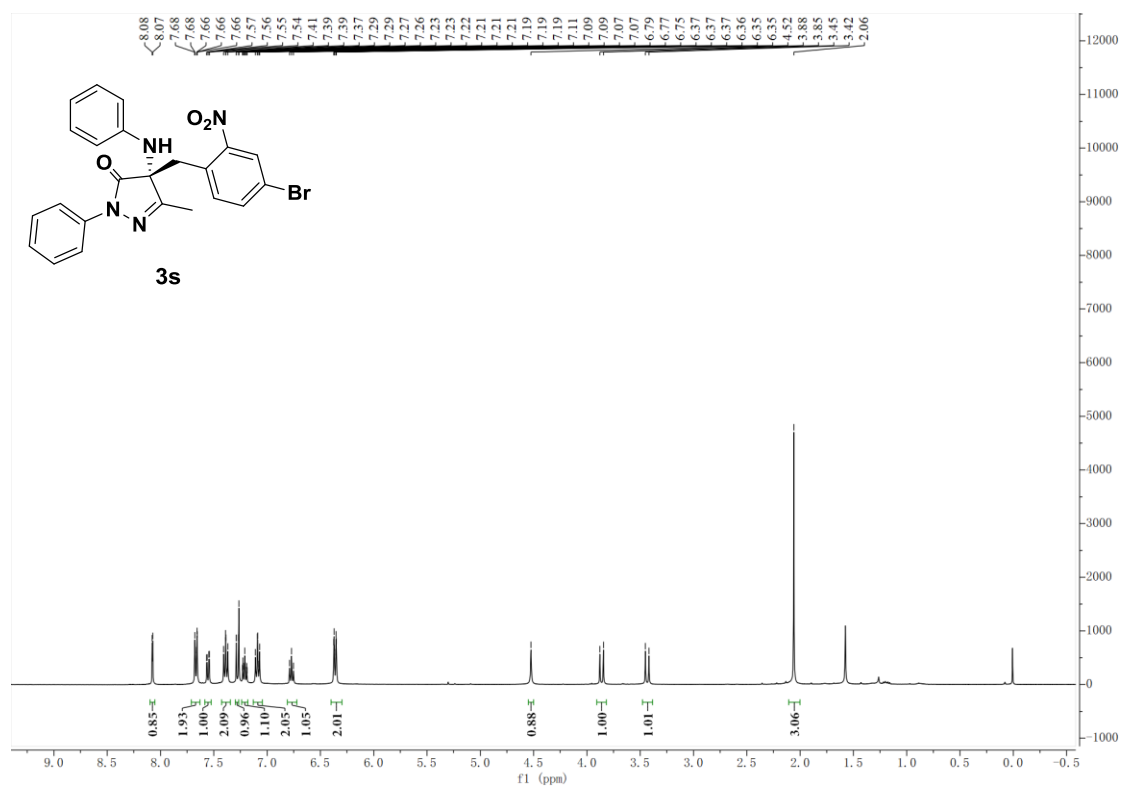

### $^{13}\text{C}$ NMR spectrum of compound 3s (in $\text{CDCl}_3$ )

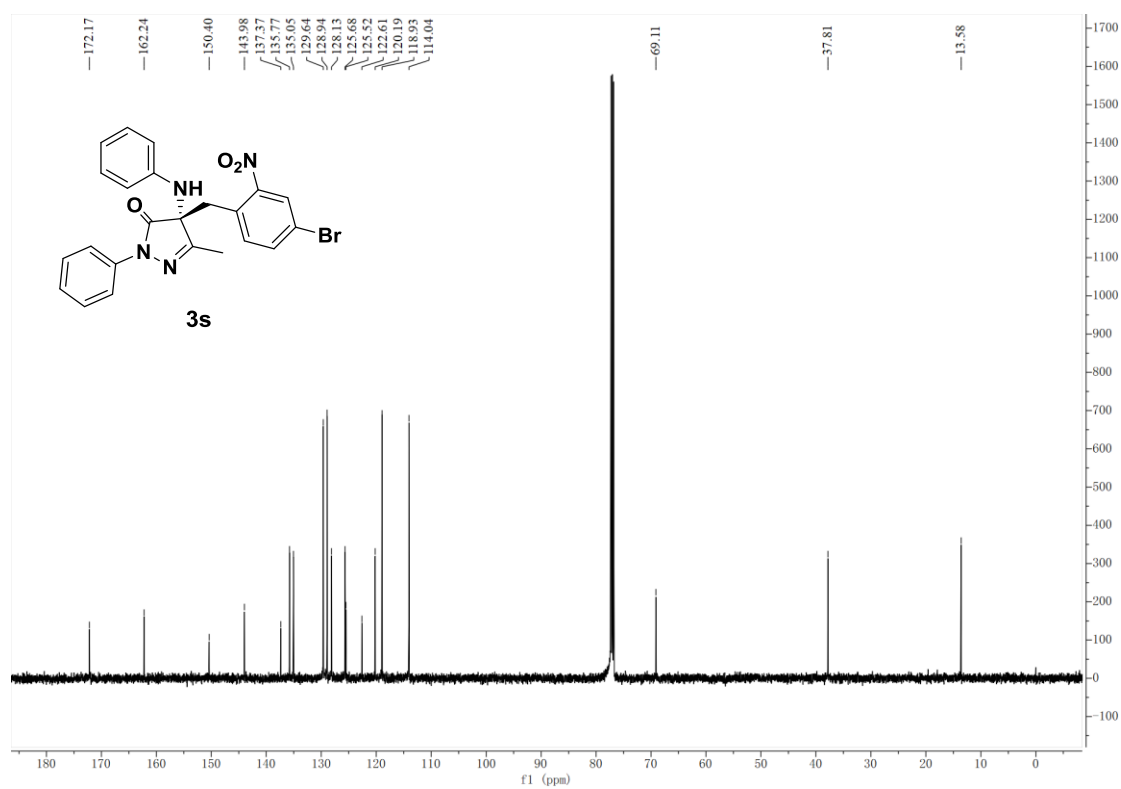

### $^1\text{H}$ NMR spectrum of compound 3t (in $\text{CDCl}_3$ )

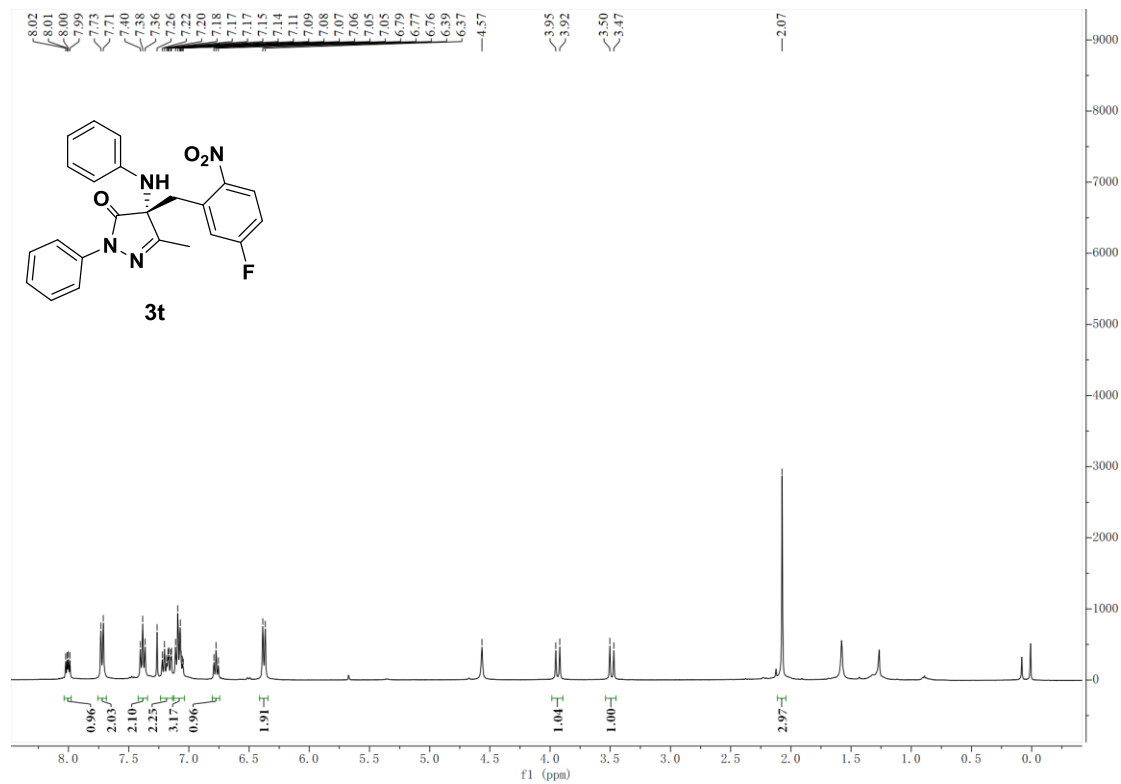

**<sup>13</sup>C NMR spectrum of compound 3t (in CDCl<sub>3</sub>)**

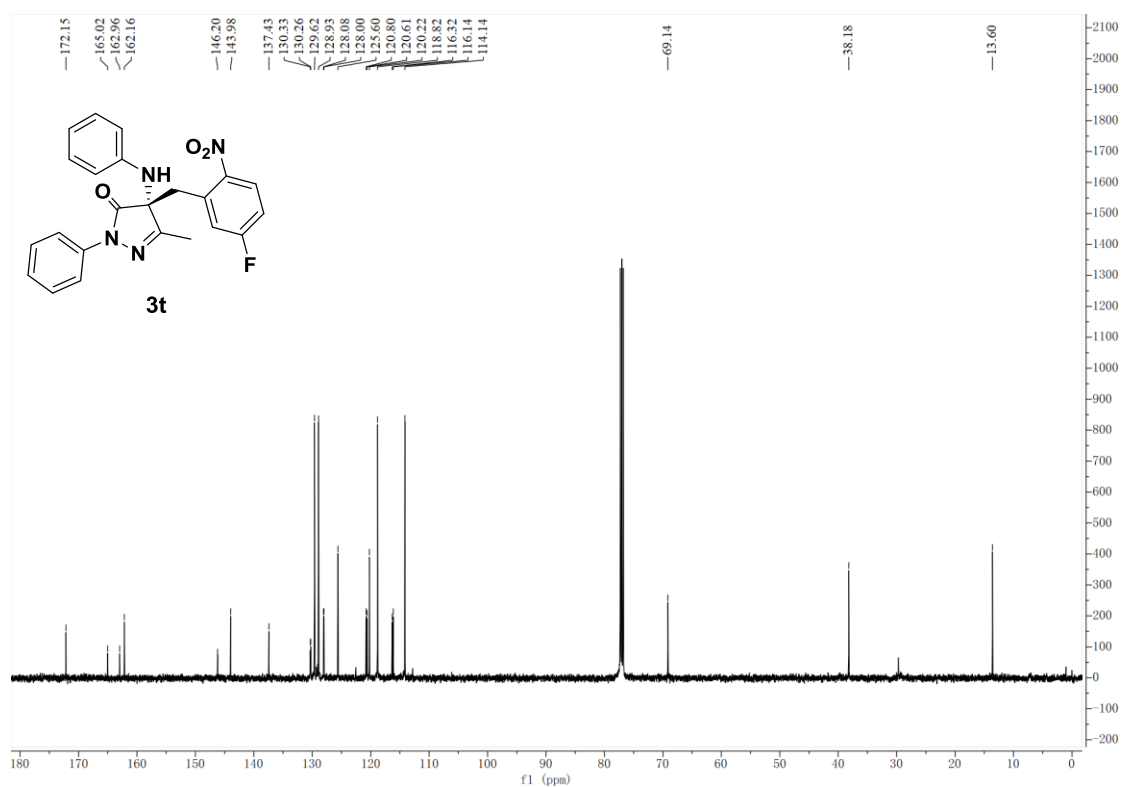

**<sup>19</sup>F NMR spectrum of compound 3t (in CDCl<sub>3</sub>)**

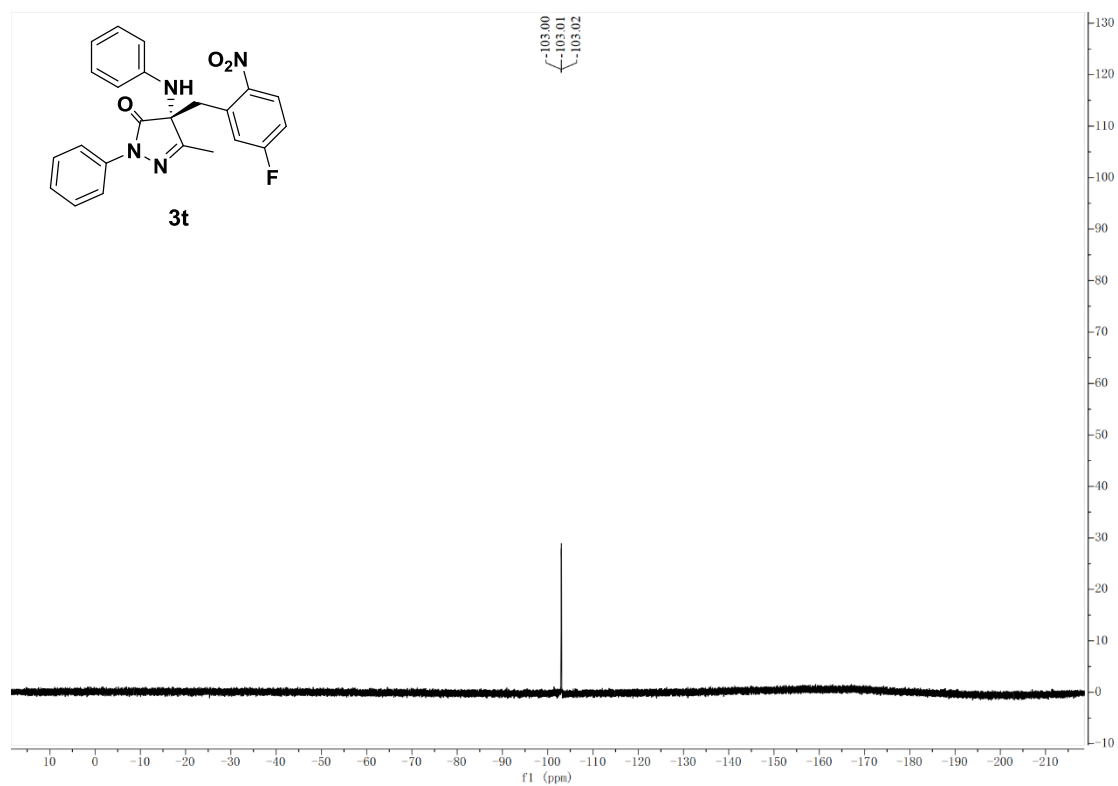

### <sup>1</sup>H NMR spectrum of compound 3u (in CDCl<sub>3</sub>)

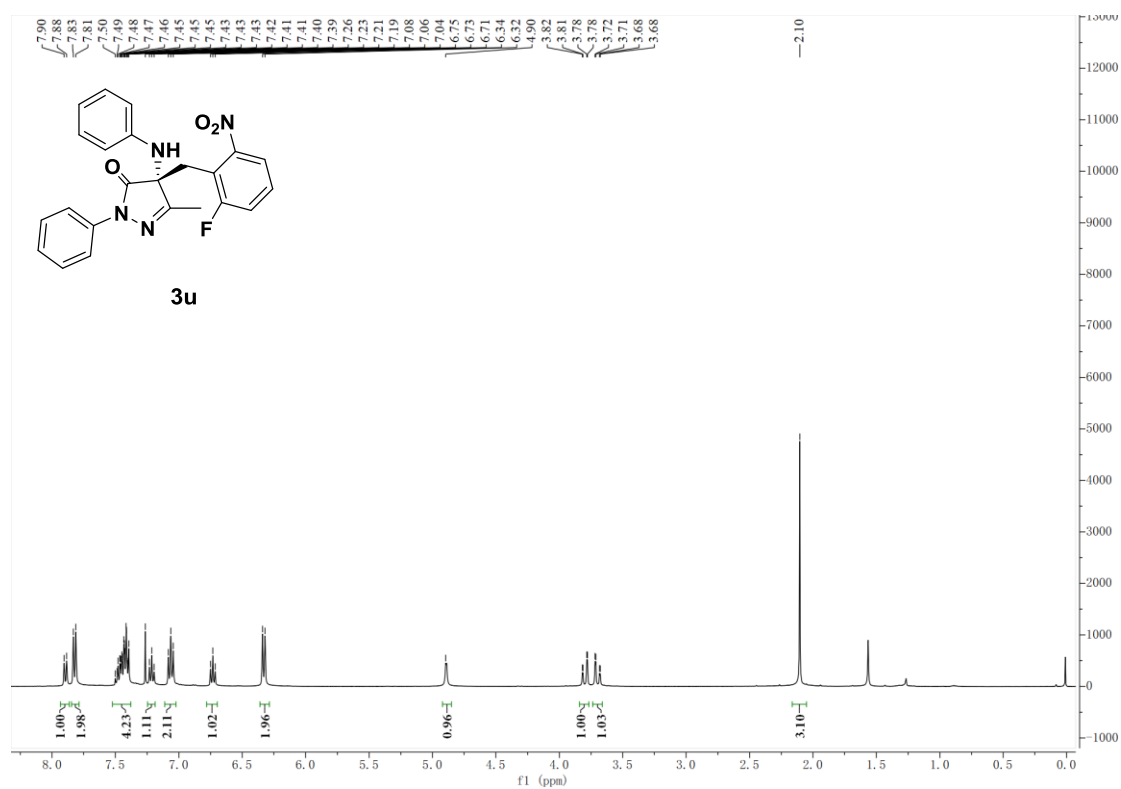

### <sup>13</sup>C NMR spectrum of compound 3u (in CDCl<sub>3</sub>)

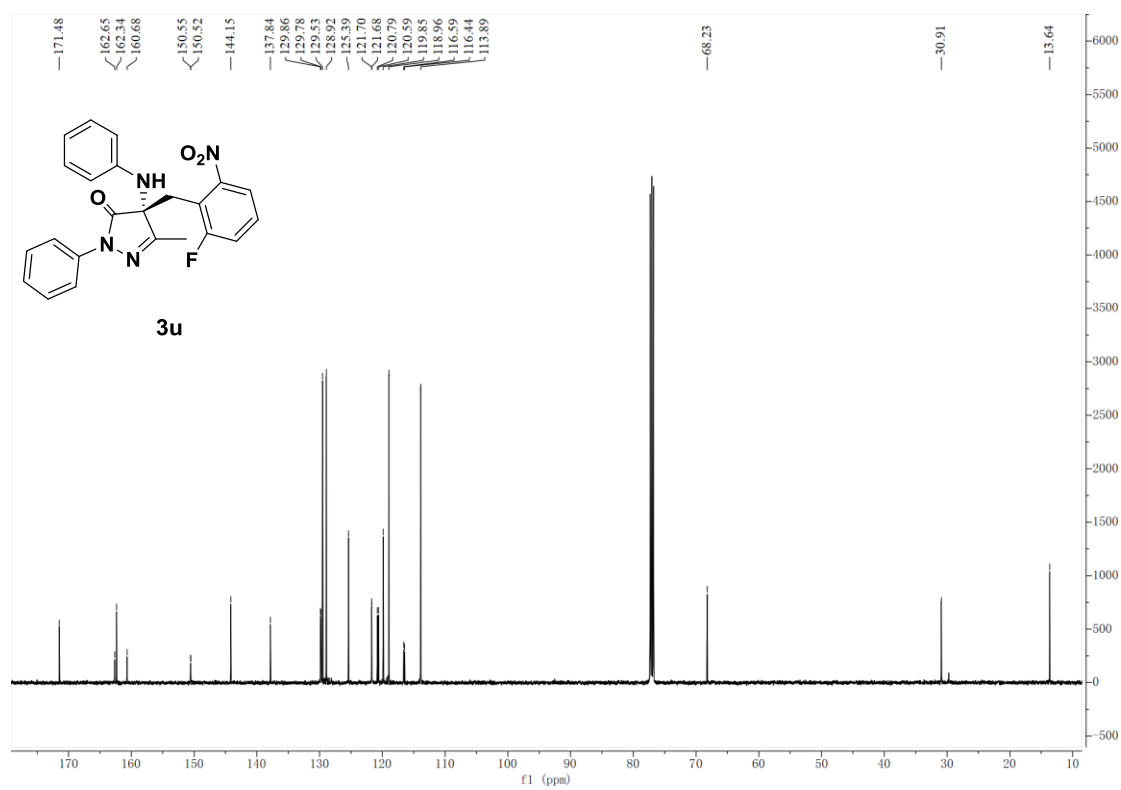

**<sup>19</sup>F NMR spectrum of compound 3u (in CDCl<sub>3</sub>)**

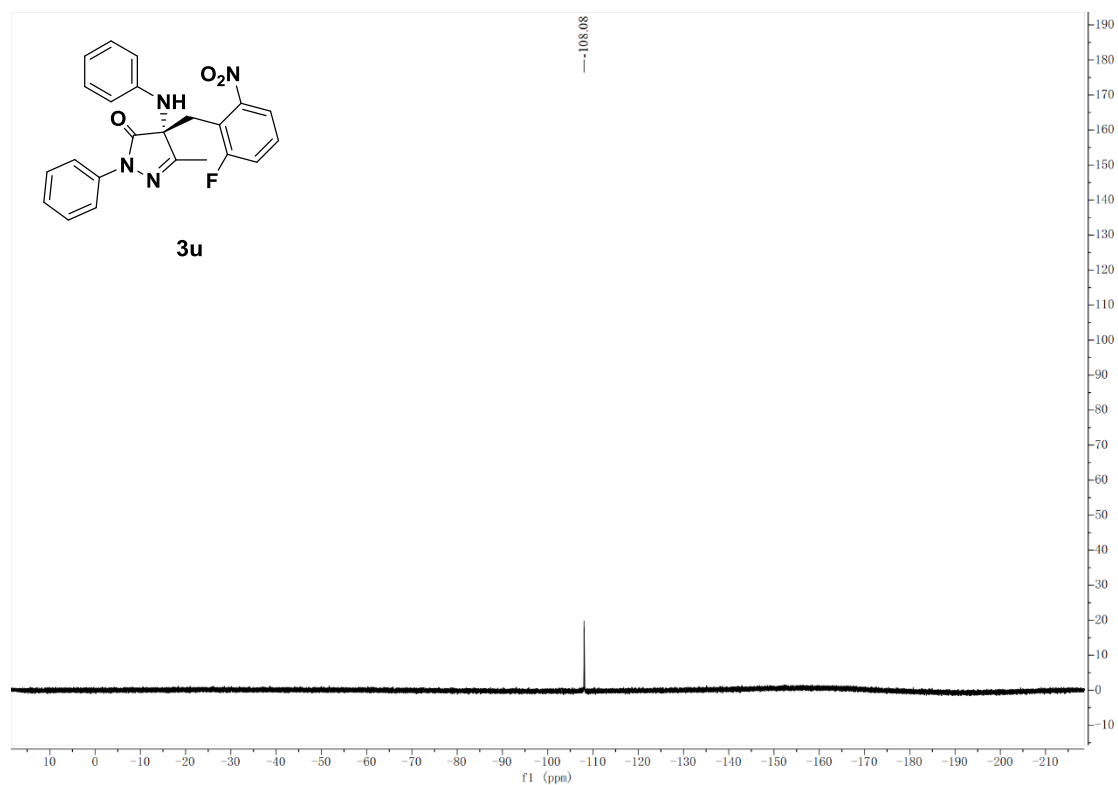

**<sup>1</sup>H NMR spectrum of compound 3v (in CDCl<sub>3</sub>)**

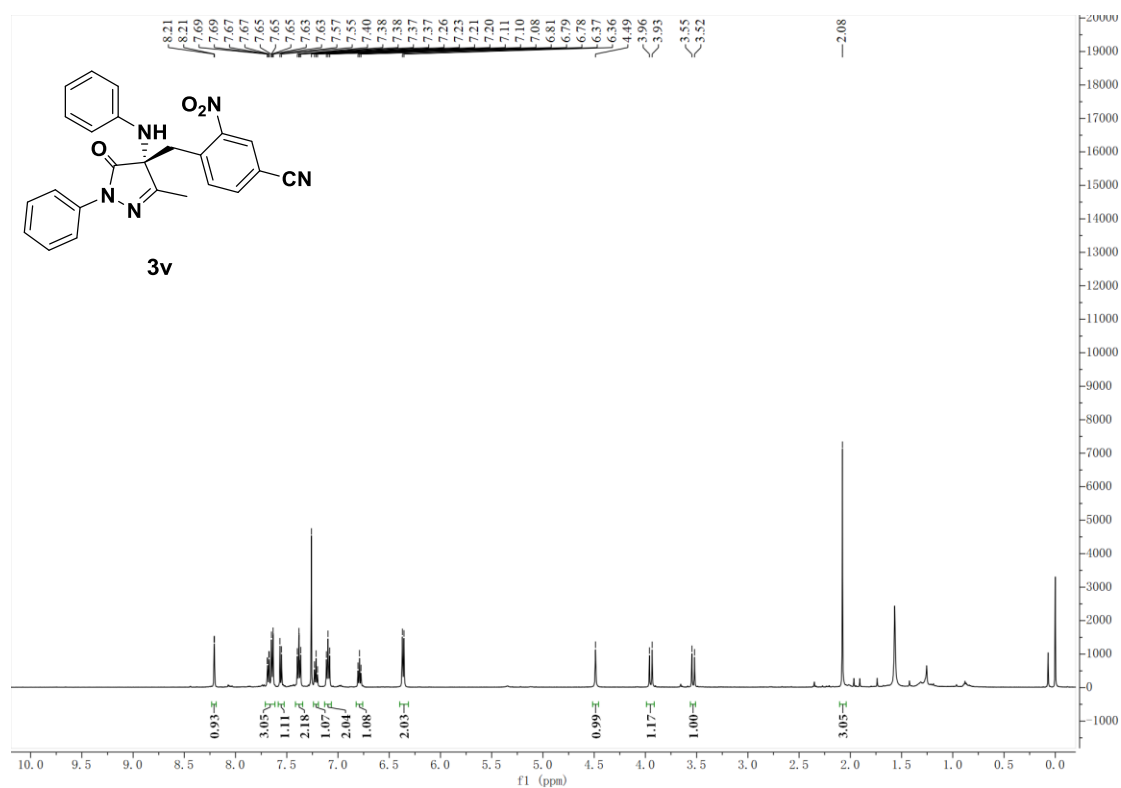

**<sup>13</sup>C NMR spectrum of compound 3v (in CDCl<sub>3</sub>)**

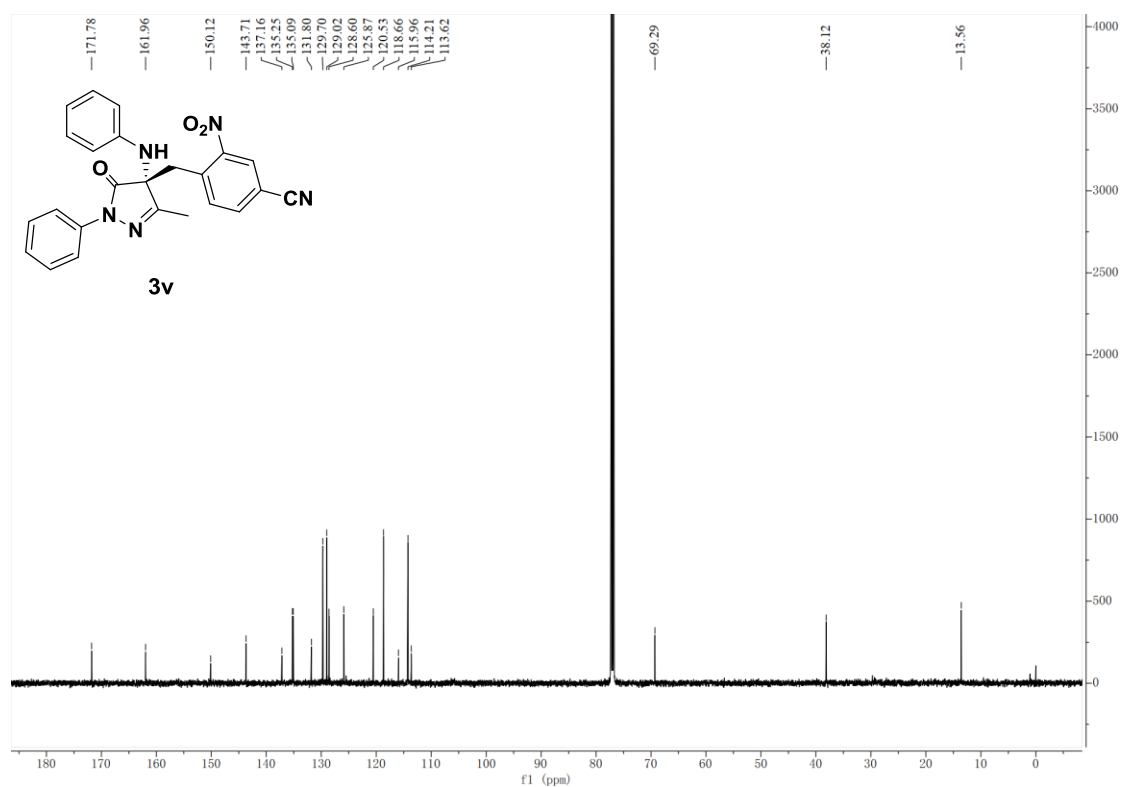

**<sup>1</sup>H NMR spectrum of compound 5a (in CDCl<sub>3</sub>)**

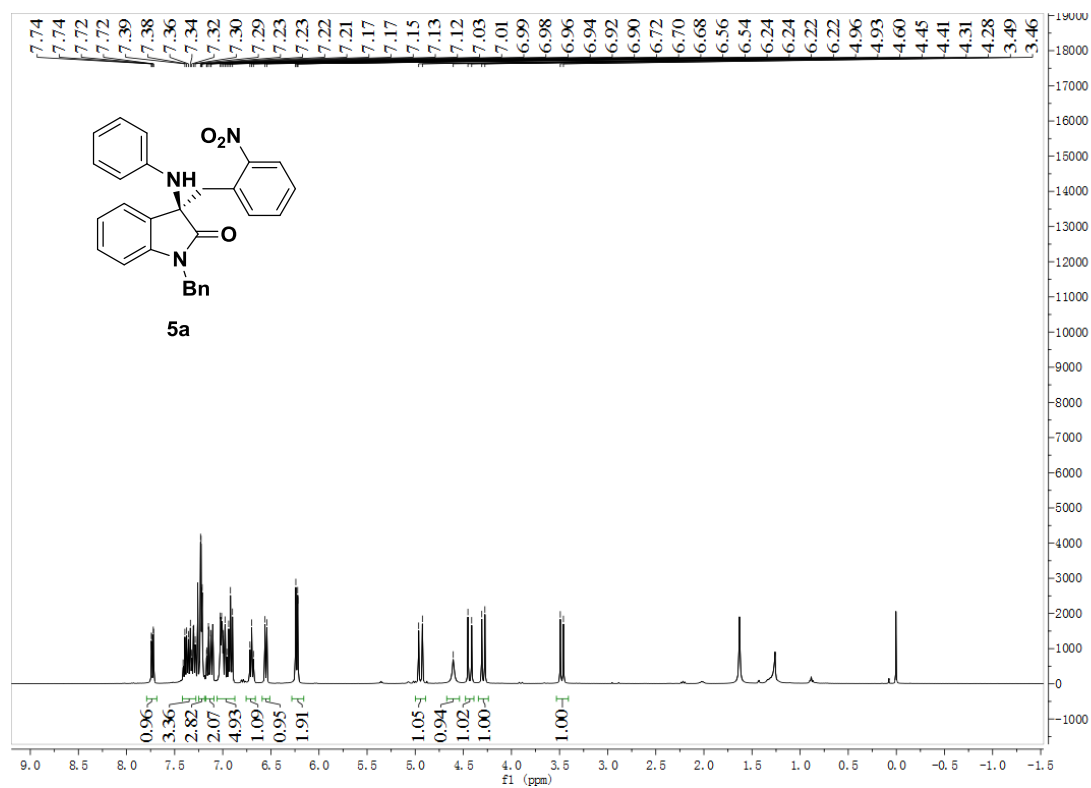



### $^{13}\text{C}$ NMR spectrum of compound 5a (in $\text{CDCl}_3$ )

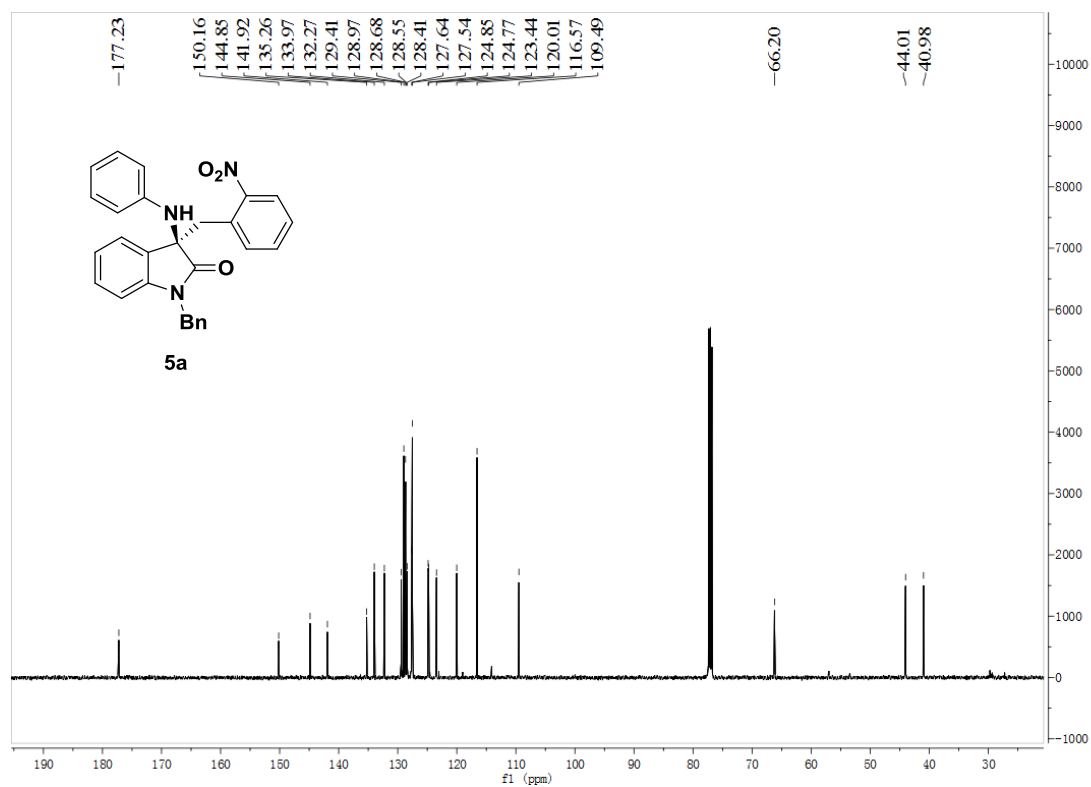

### $^1\text{H}$ NMR spectrum of compound 5b (in $\text{CDCl}_3$ )

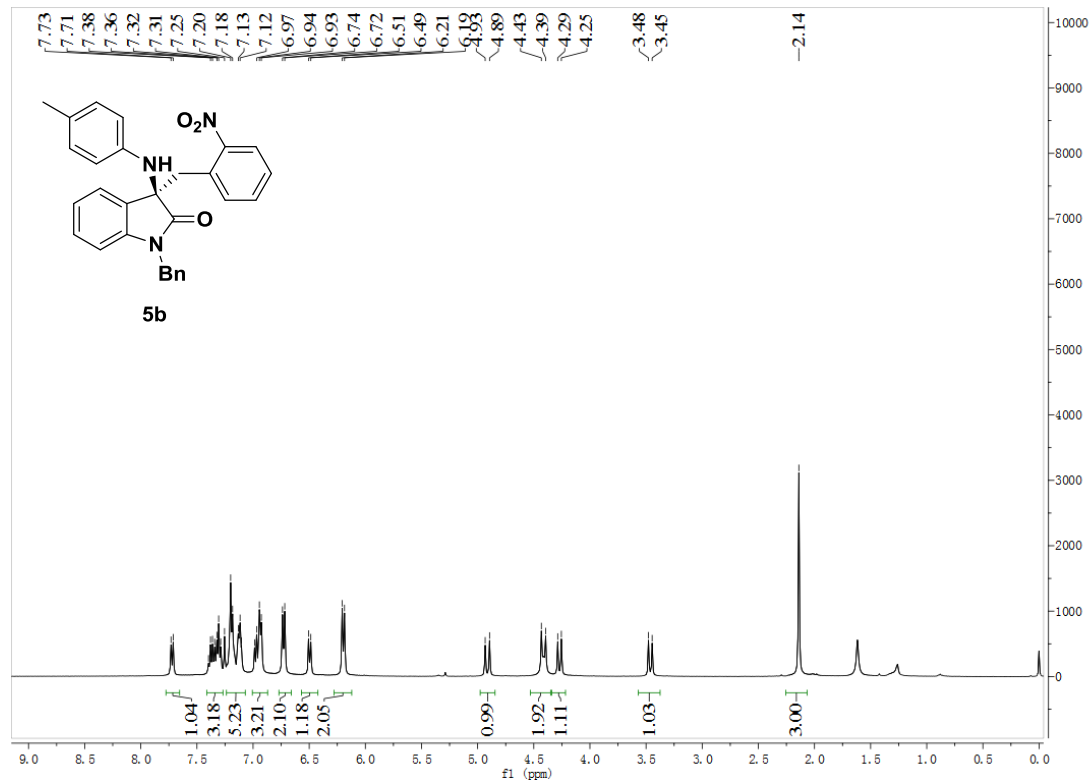

**<sup>13</sup>C NMR spectrum of compound 5b (in CDCl<sub>3</sub>)**

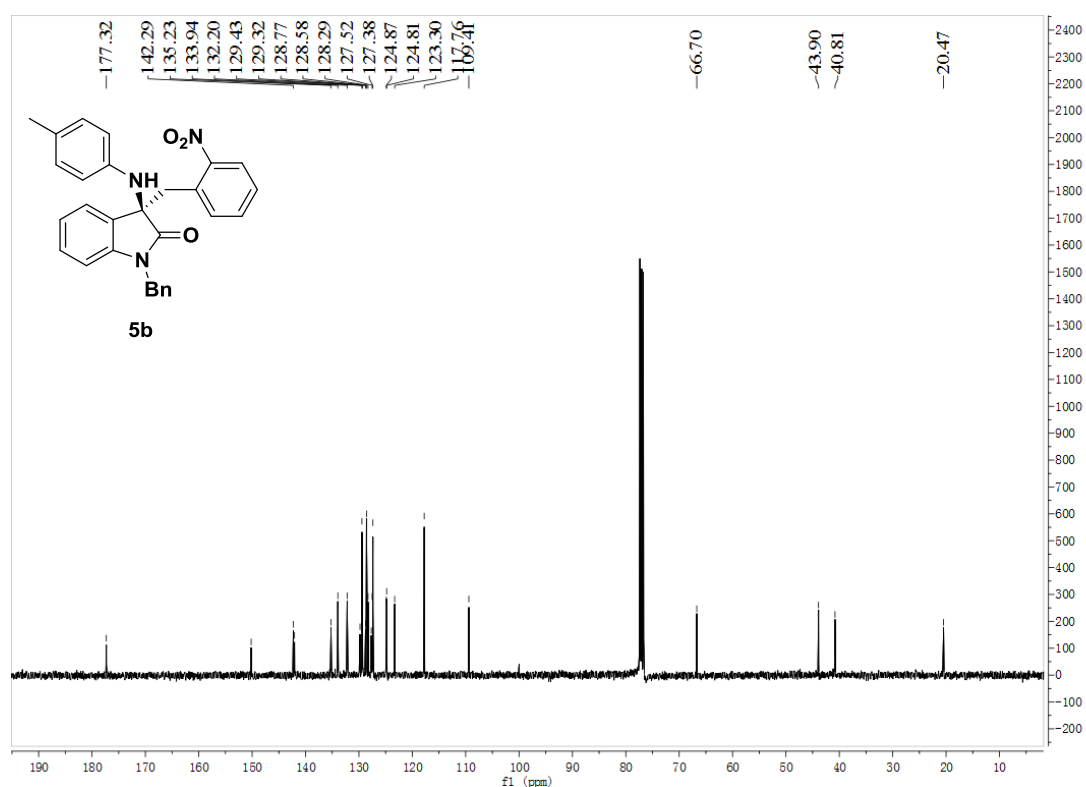

**<sup>1</sup>H NMR spectrum of compound 5c (in CDCl<sub>3</sub>)**

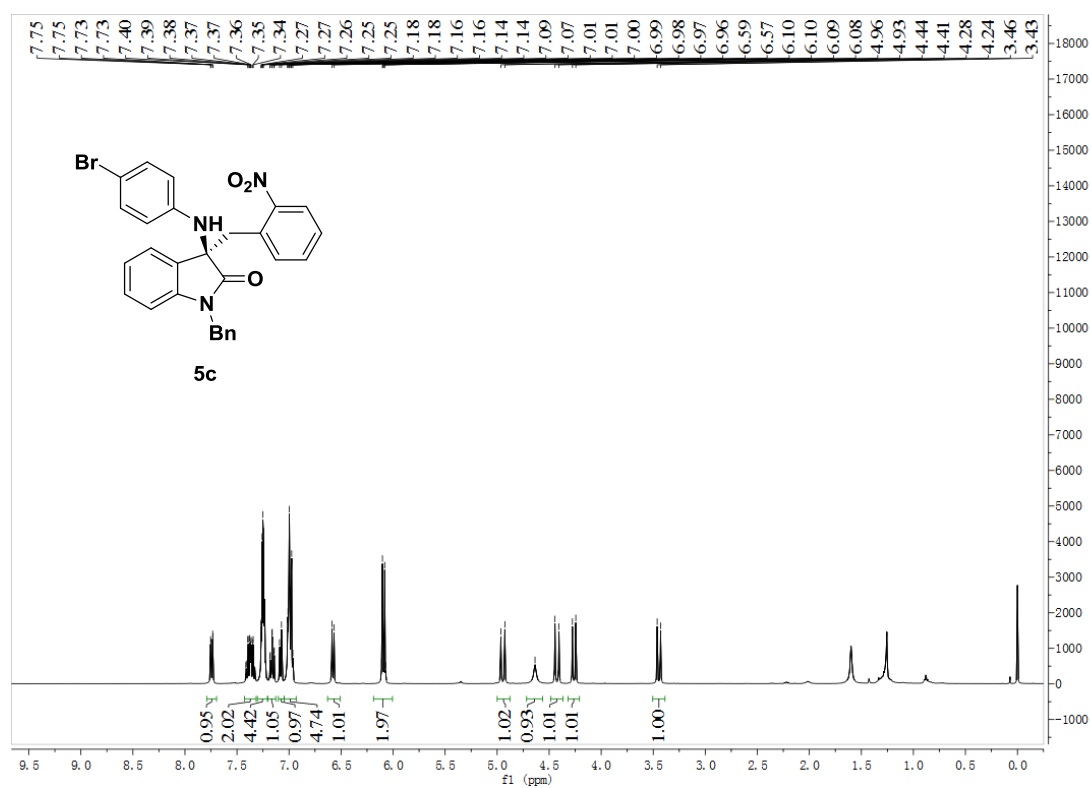

### <sup>13</sup>C NMR spectrum of compound 5c (in CDCl<sub>3</sub>)

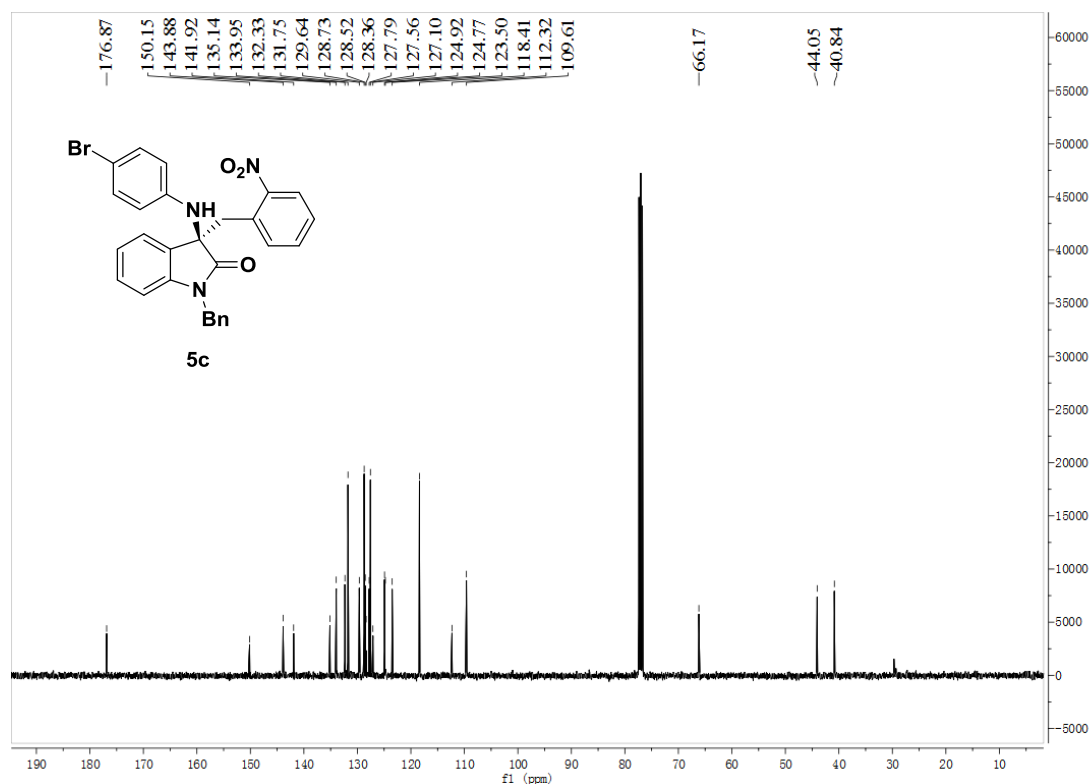

### <sup>1</sup>H NMR spectrum of compound 5d (in CDCl<sub>3</sub>)

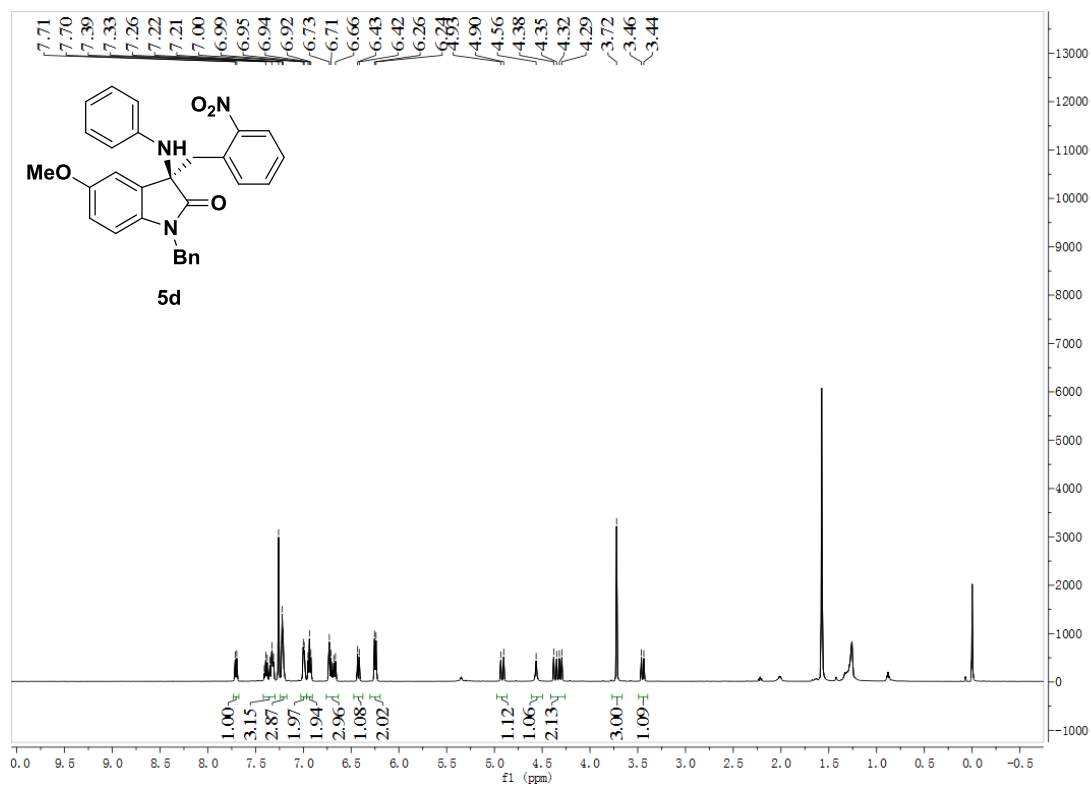

### $^{13}\text{C}$ NMR spectrum of compound 5d (in $\text{CDCl}_3$ )

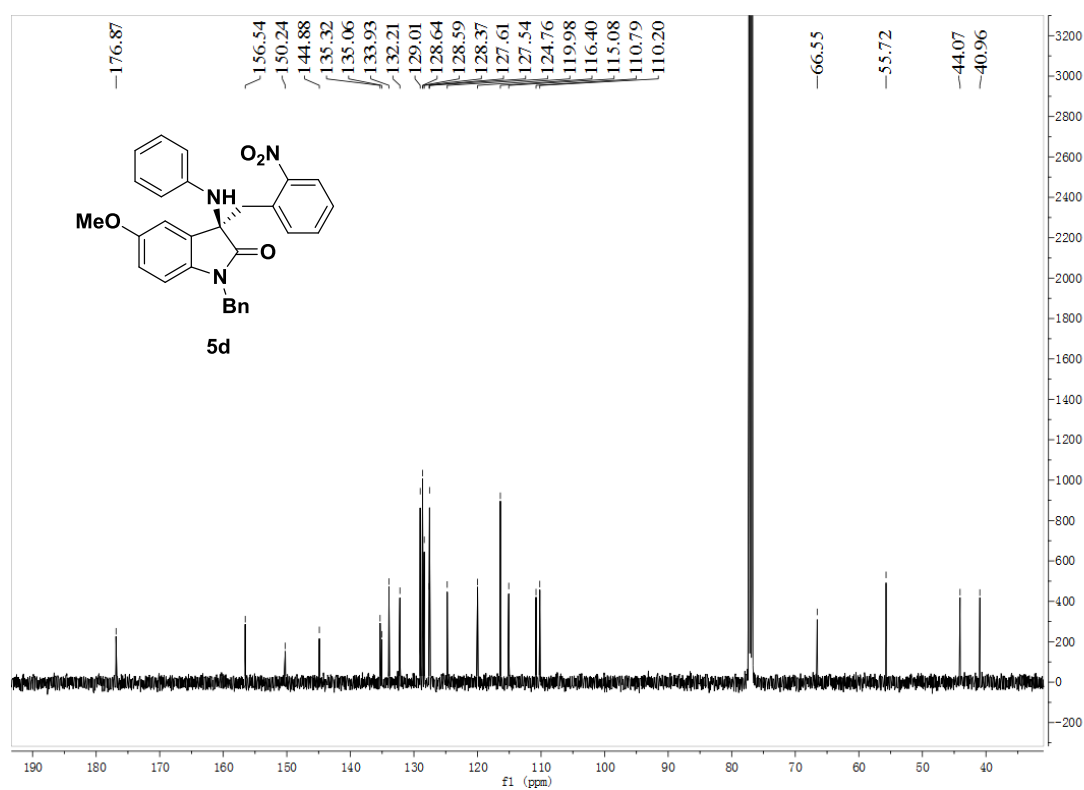

### $^1\text{H}$ NMR spectrum of compound 5e (in $\text{CDCl}_3$ )

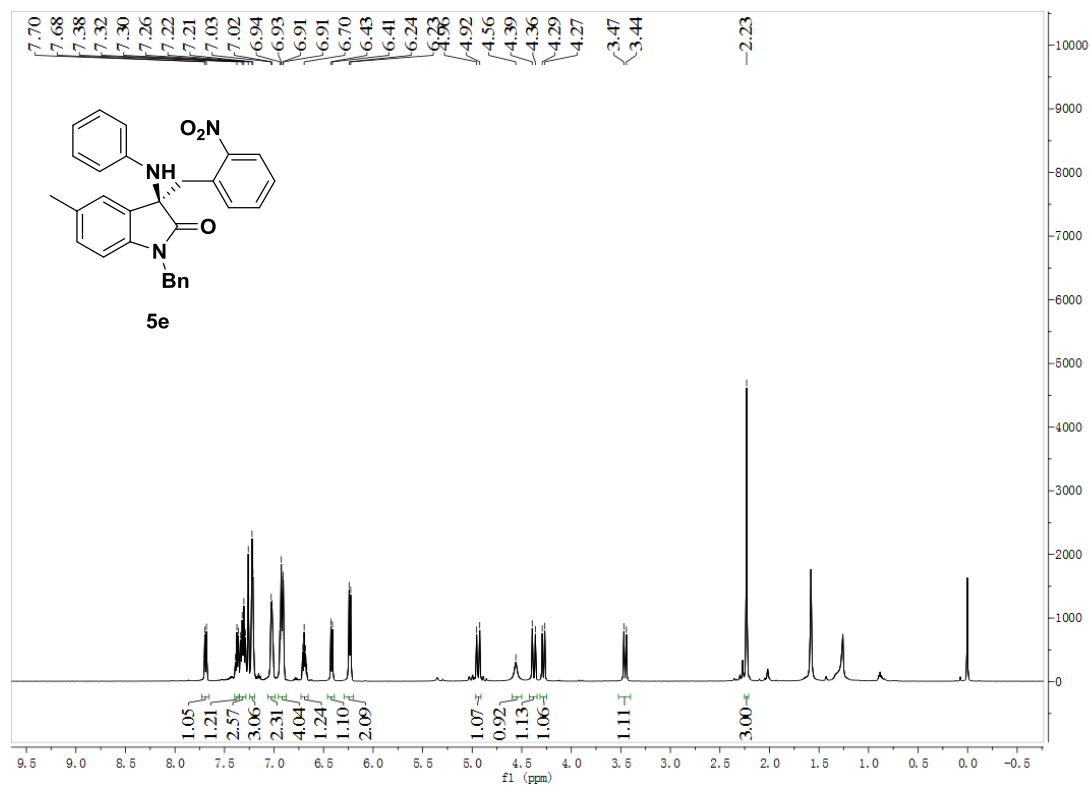

**<sup>13</sup>C NMR spectrum of compound 5e (in CDCl<sub>3</sub>)**

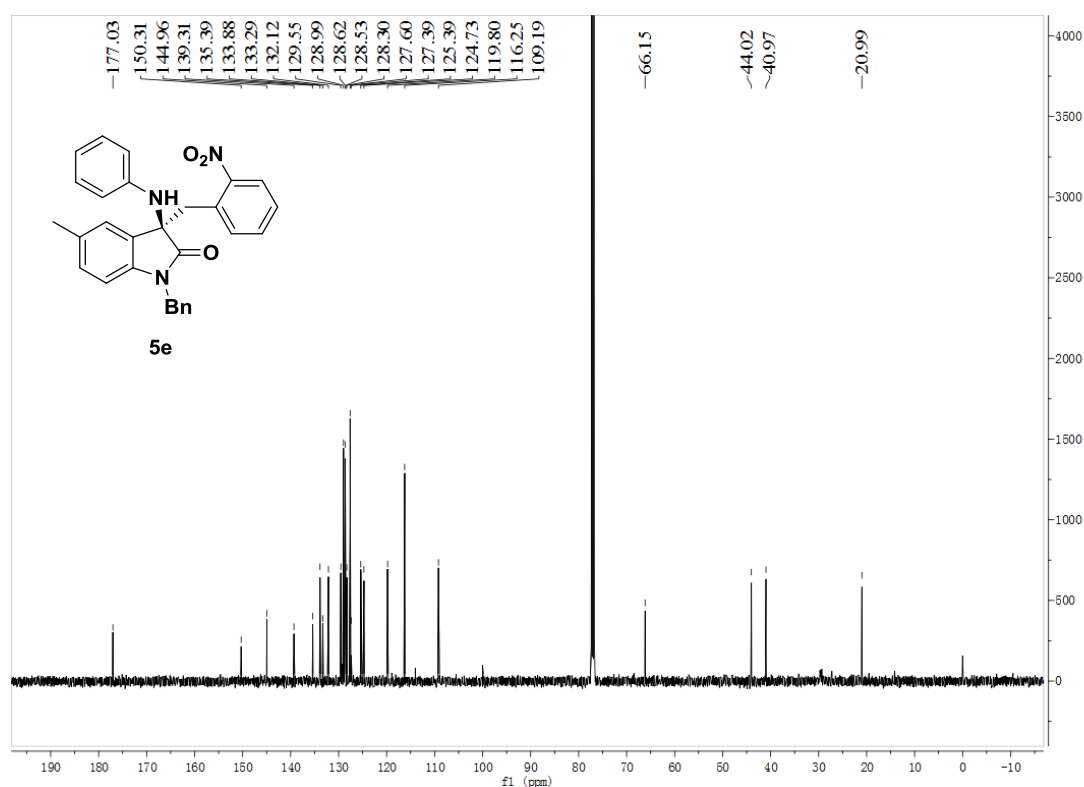

**<sup>1</sup>H NMR spectrum of compound 5f (in CDCl<sub>3</sub>)**

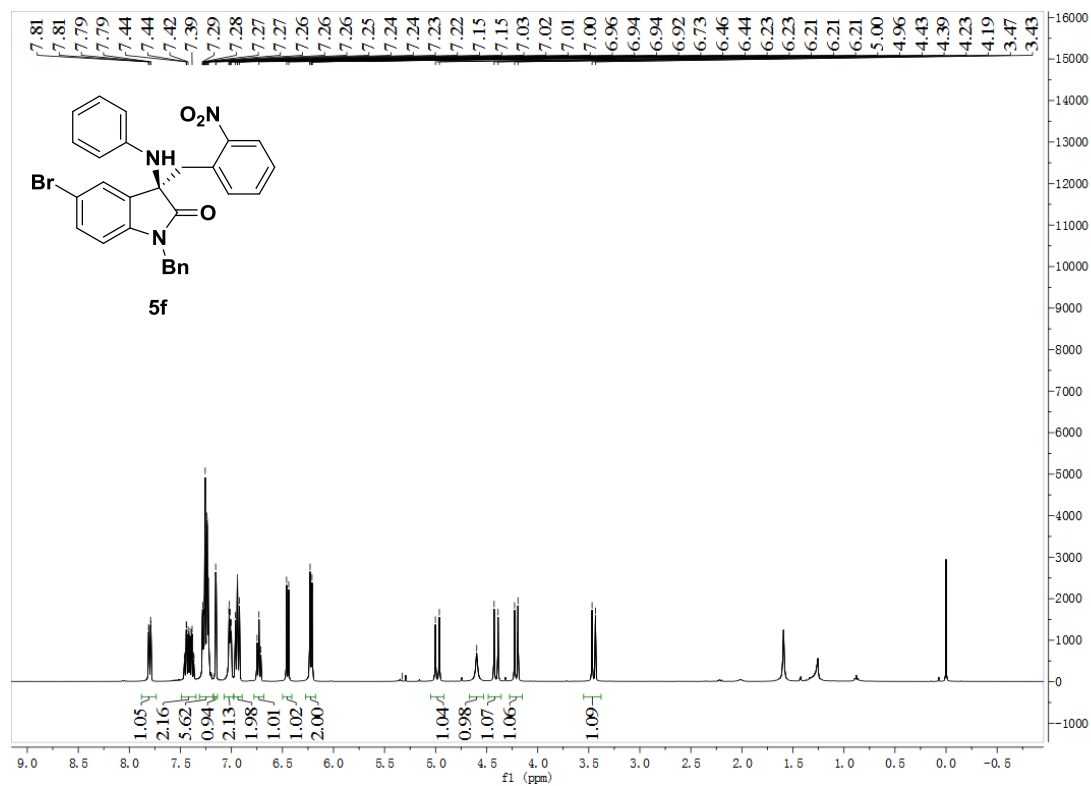

### <sup>13</sup>C NMR spectrum of compound 5f (in CDCl<sub>3</sub>)

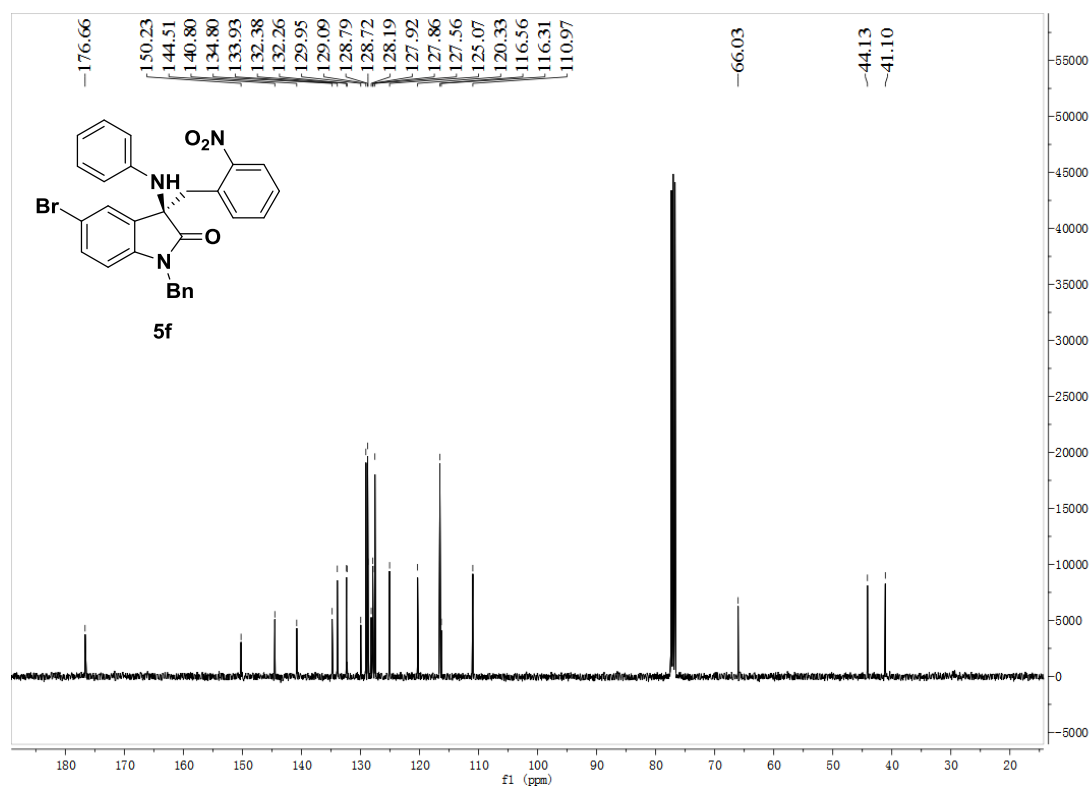

### <sup>1</sup>H NMR spectrum of compound 5g (in CDCl<sub>3</sub>)

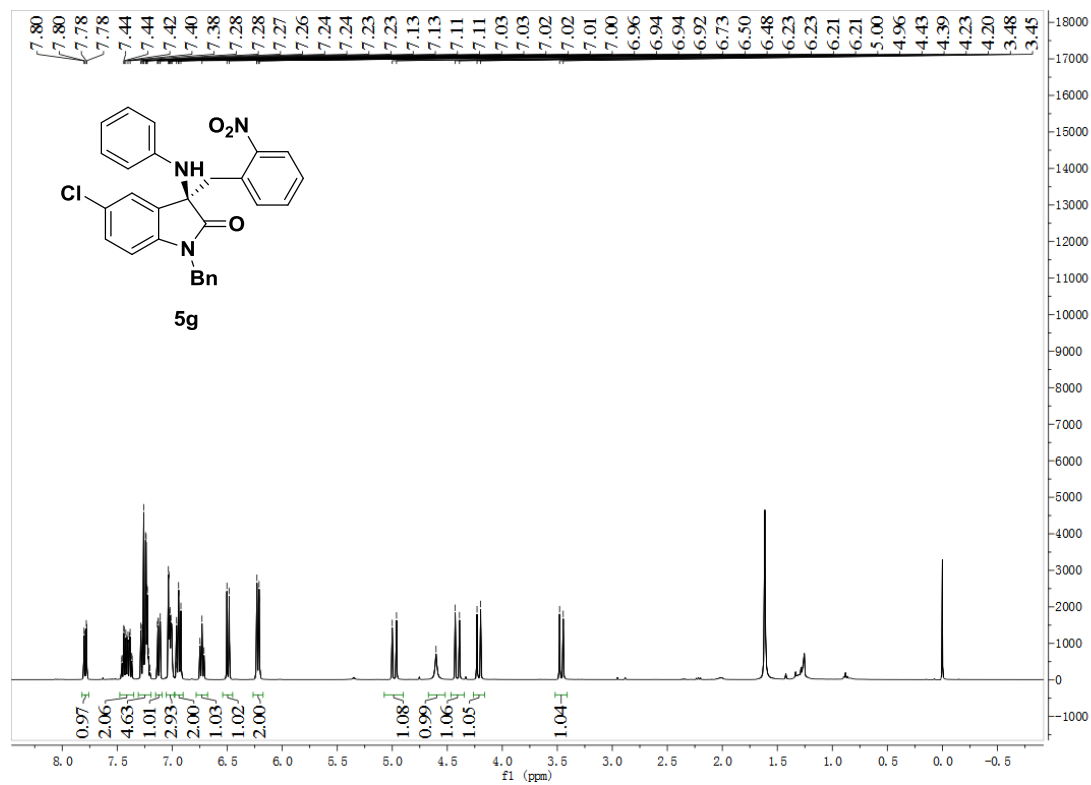

**<sup>13</sup>C NMR spectrum of compound 5g (in CDCl<sub>3</sub>)**

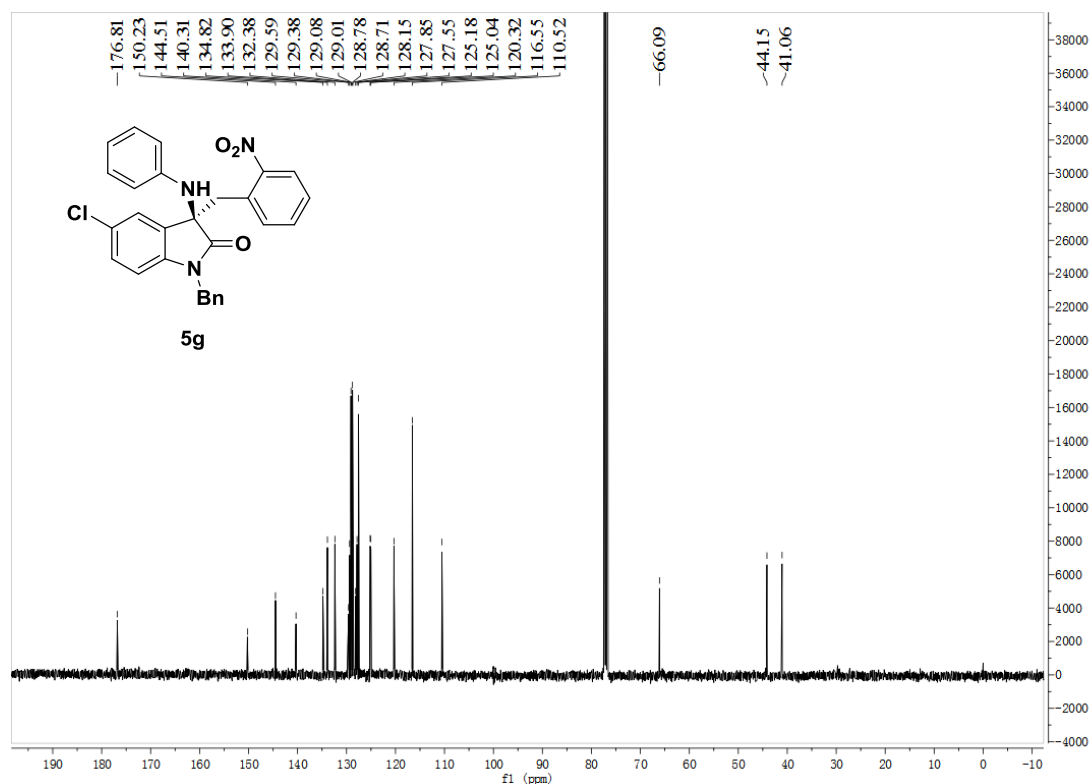

**<sup>1</sup>H NMR spectrum of compound 5h (in CDCl<sub>3</sub>)**

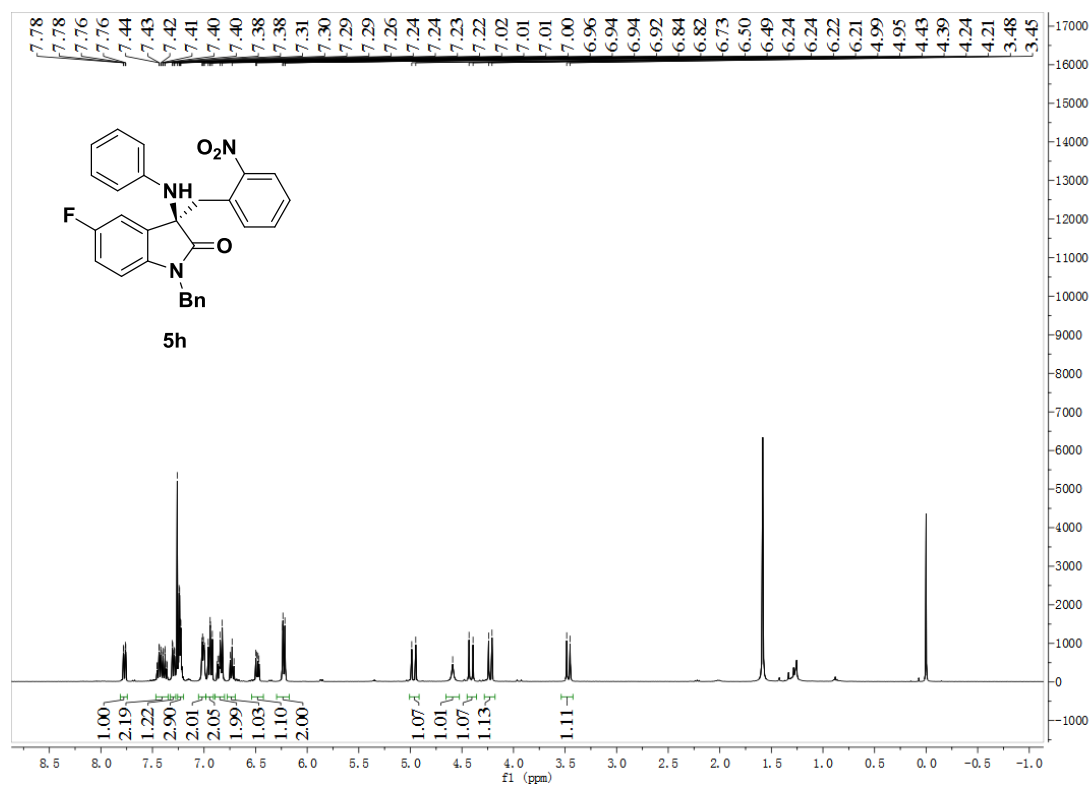

**<sup>13</sup>C NMR spectrum of compound 5h (in CDCl<sub>3</sub>)**

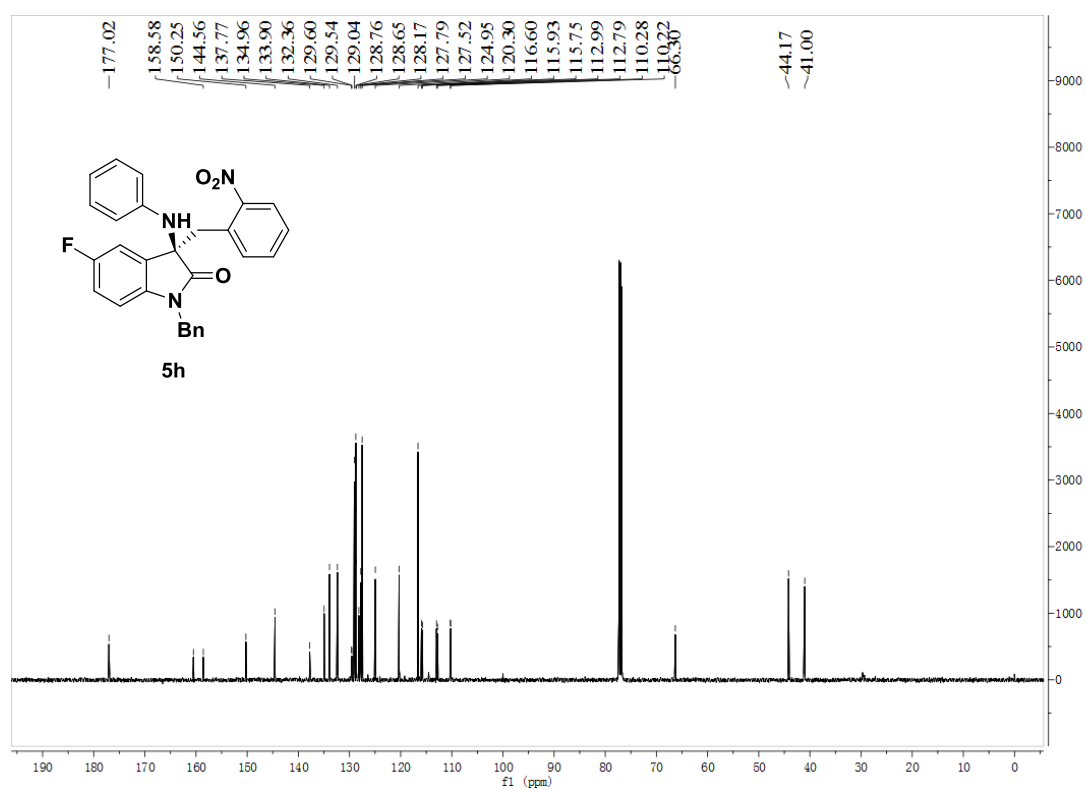

**<sup>19</sup>F NMR spectrum of compound 5h (in CDCl<sub>3</sub>)**

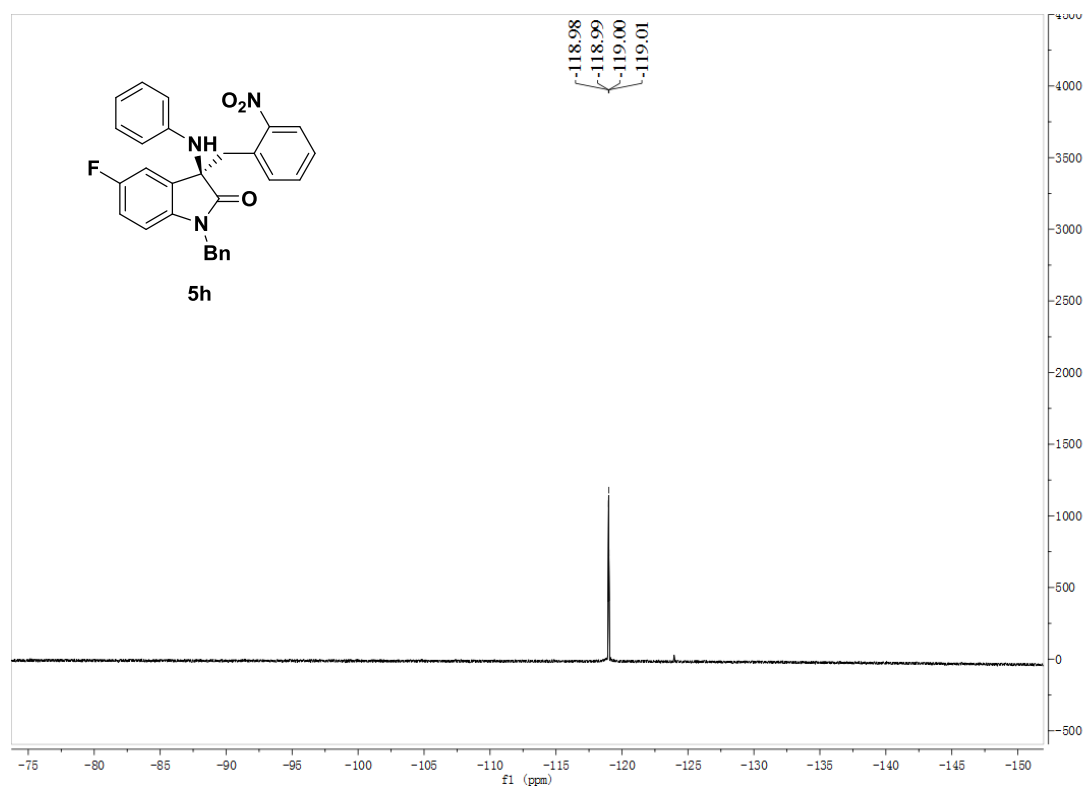



### <sup>1</sup>H NMR spectrum of compound 5i (in CDCl<sub>3</sub>)

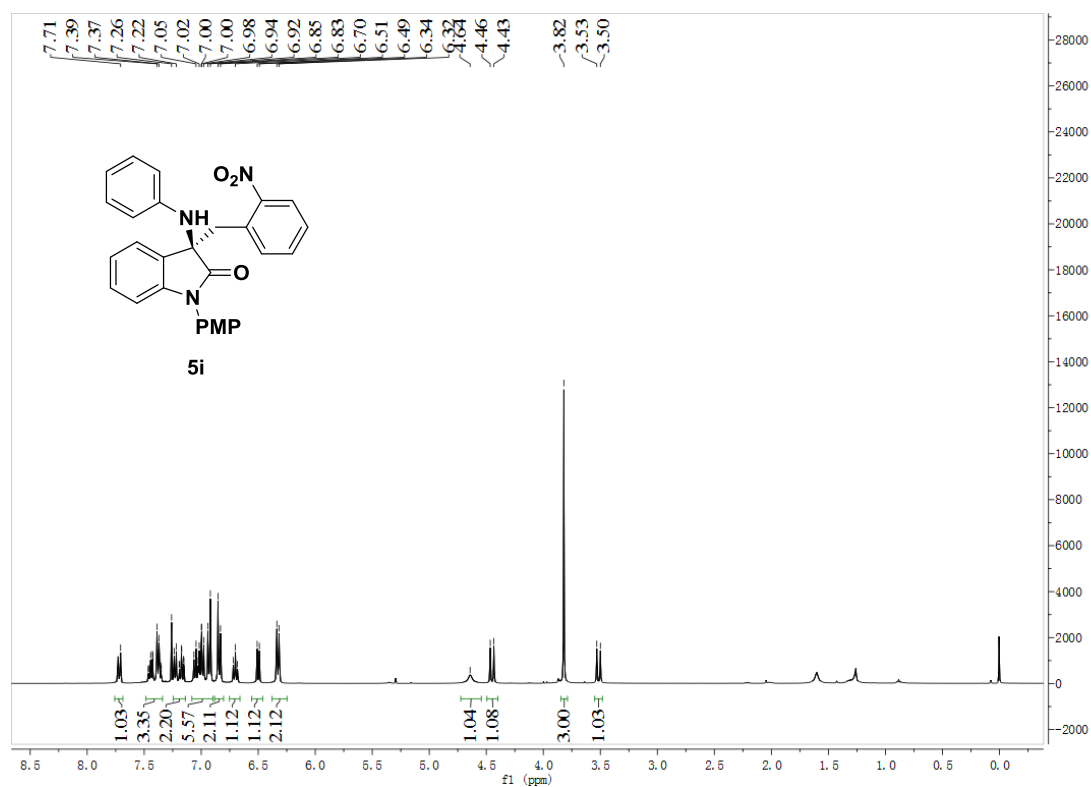

### <sup>13</sup>C NMR spectrum of compound 5i (in CDCl<sub>3</sub>)

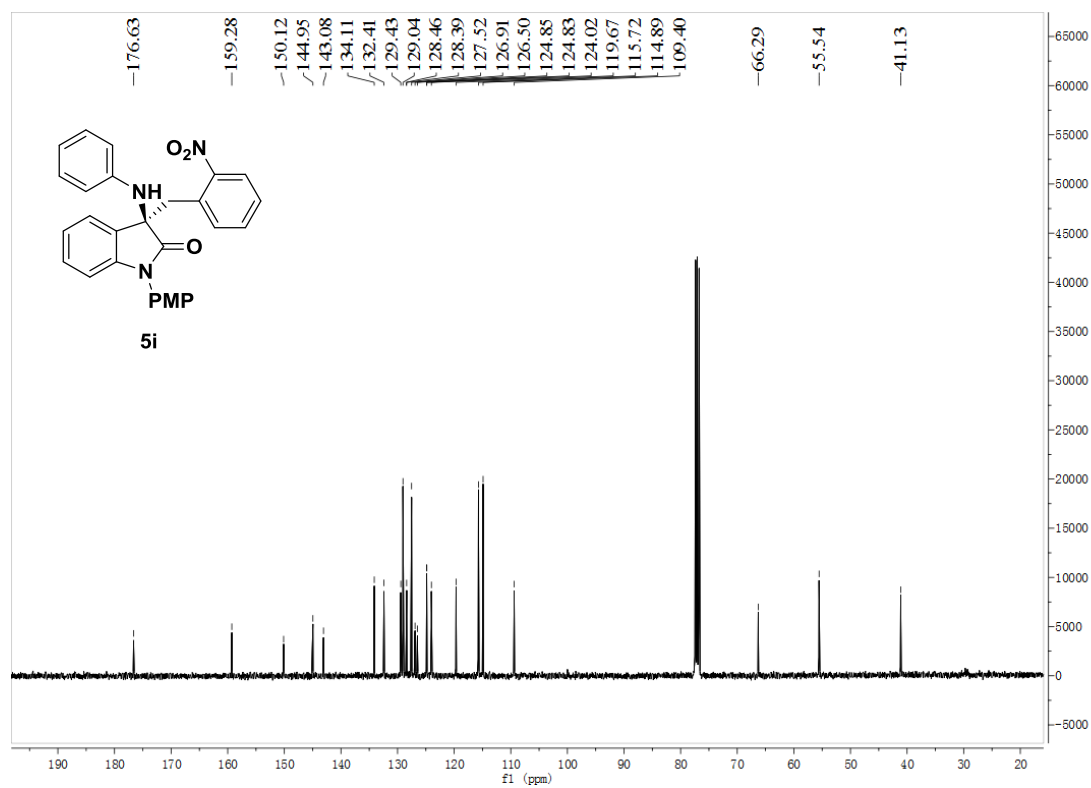

### <sup>1</sup>H NMR spectrum of compound 5j (in CDCl<sub>3</sub>)

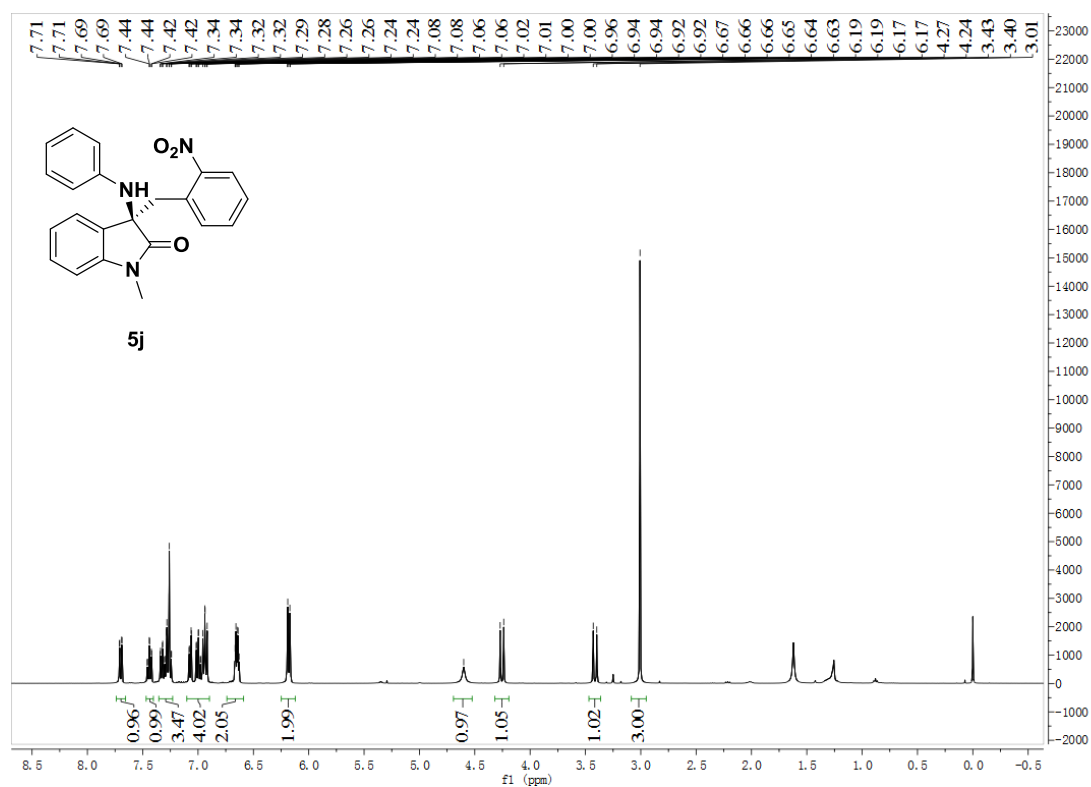

### <sup>13</sup>C NMR spectrum of compound 5j (in CDCl<sub>3</sub>)

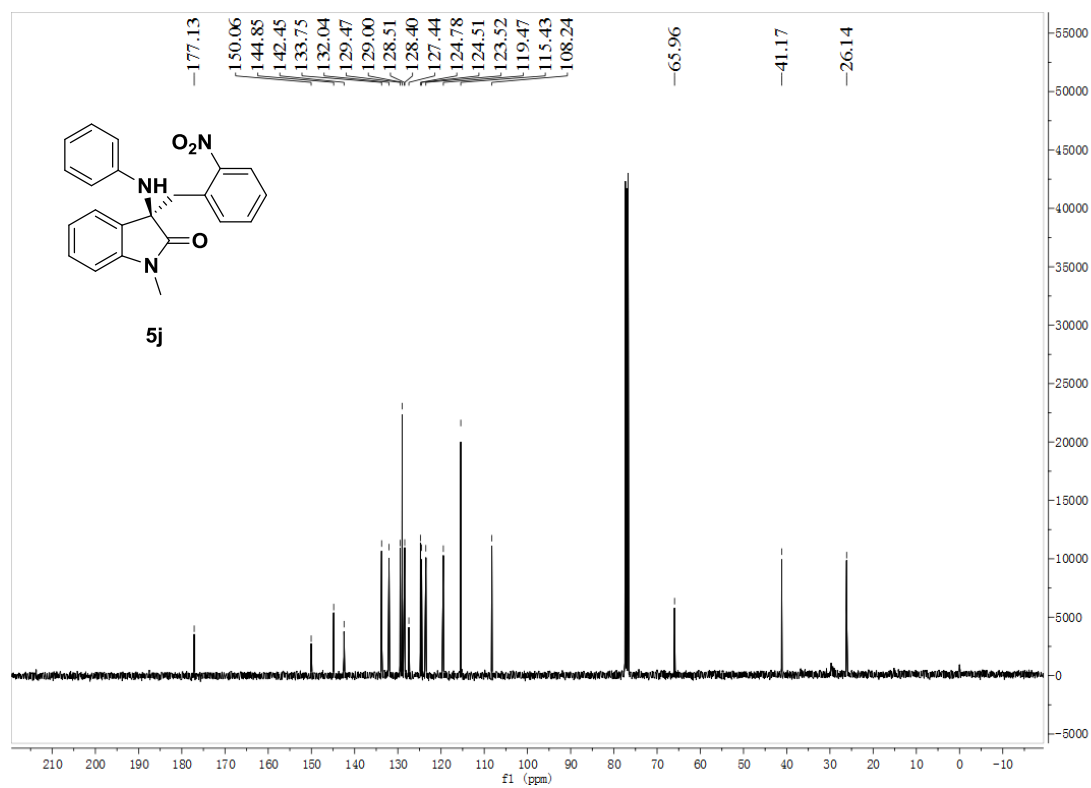

### <sup>1</sup>H NMR spectrum of compound 5k (in CDCl<sub>3</sub>)

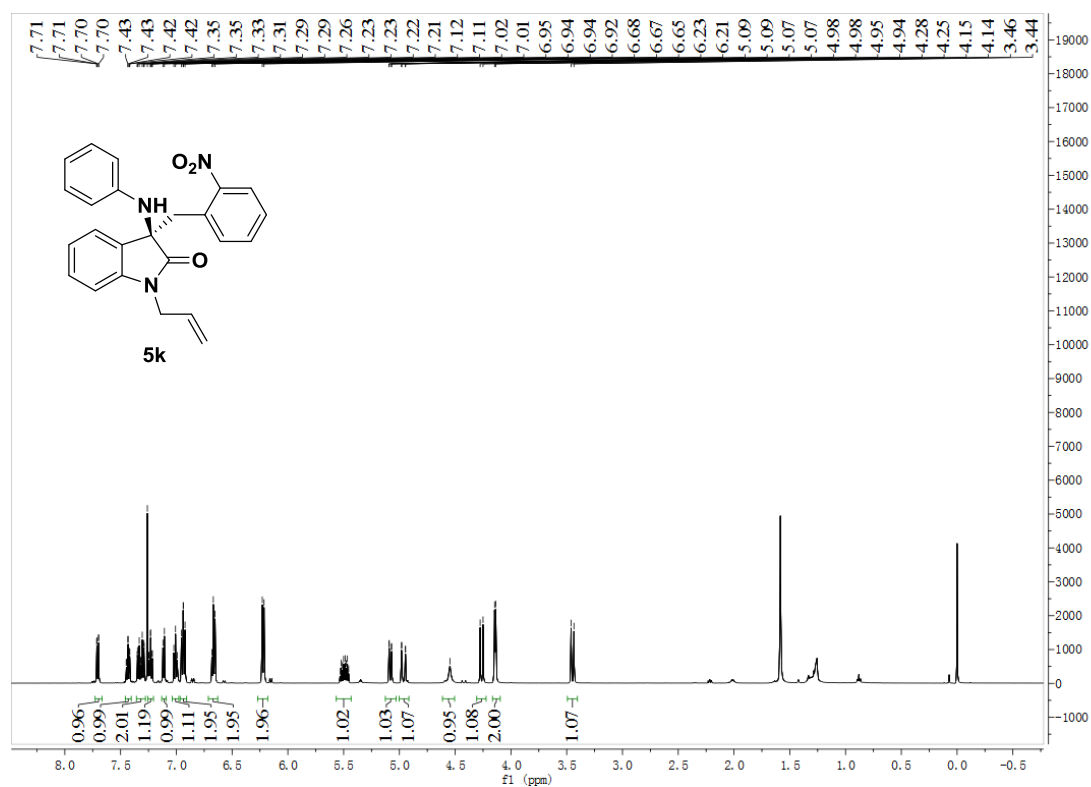

### <sup>13</sup>C NMR spectrum of compound 5k (in CDCl<sub>3</sub>)

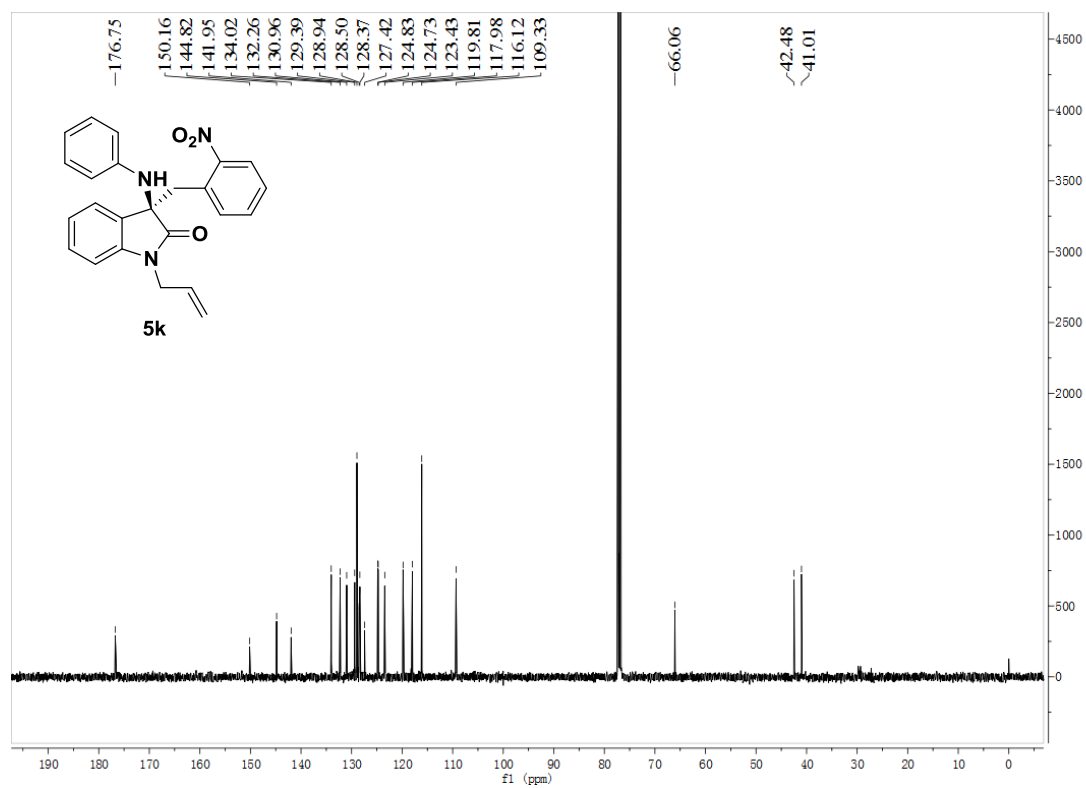

### <sup>1</sup>H NMR spectrum of compound 5i (in CDCl<sub>3</sub>)

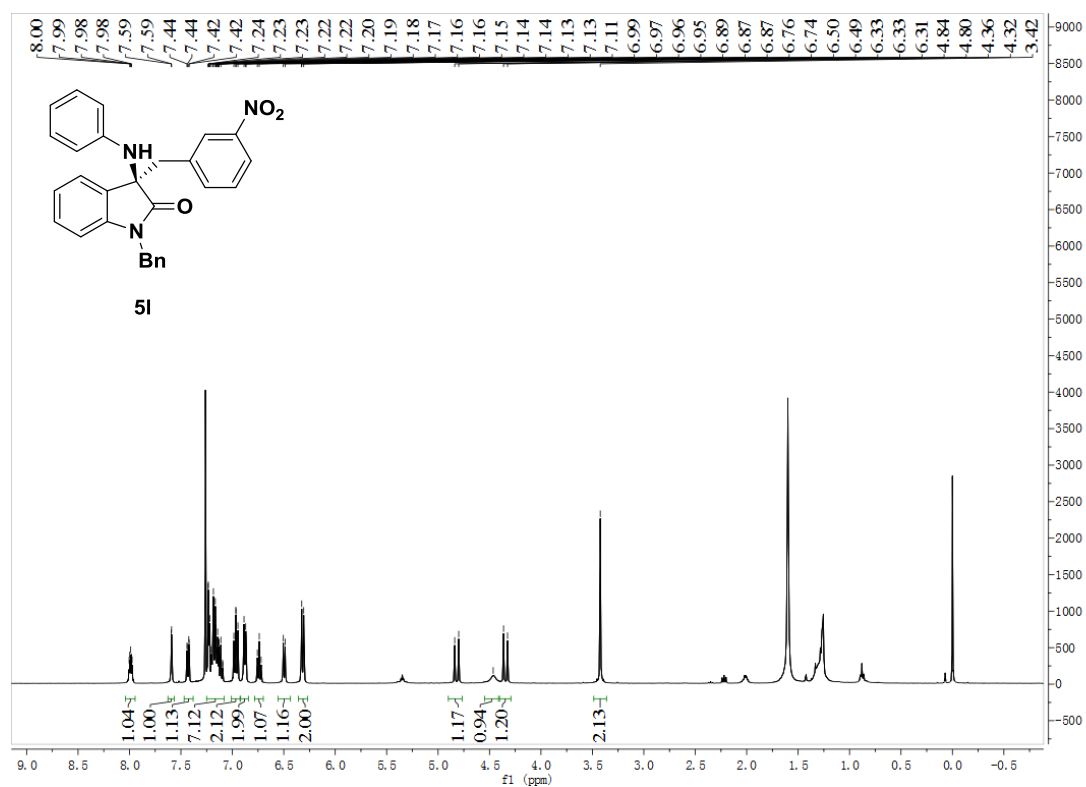

### <sup>13</sup>C NMR spectrum of compound 5i (in CDCl<sub>3</sub>)

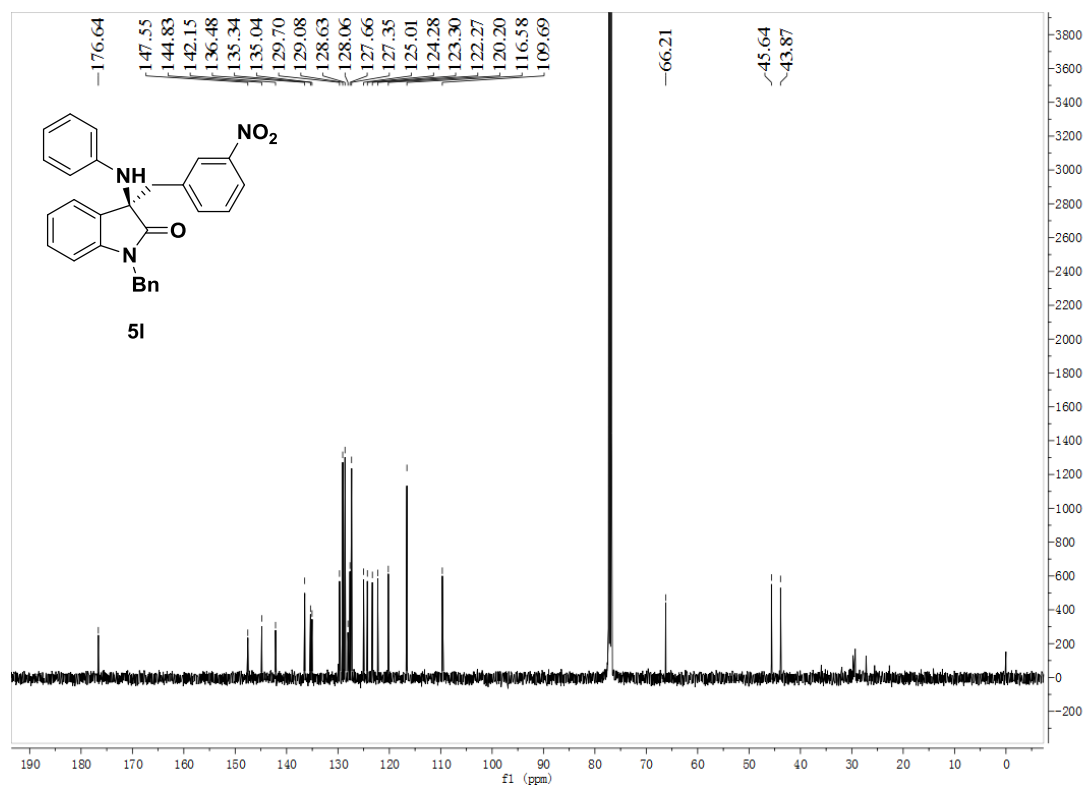

### <sup>1</sup>H NMR spectrum of compound 5m (in CDCl<sub>3</sub>)

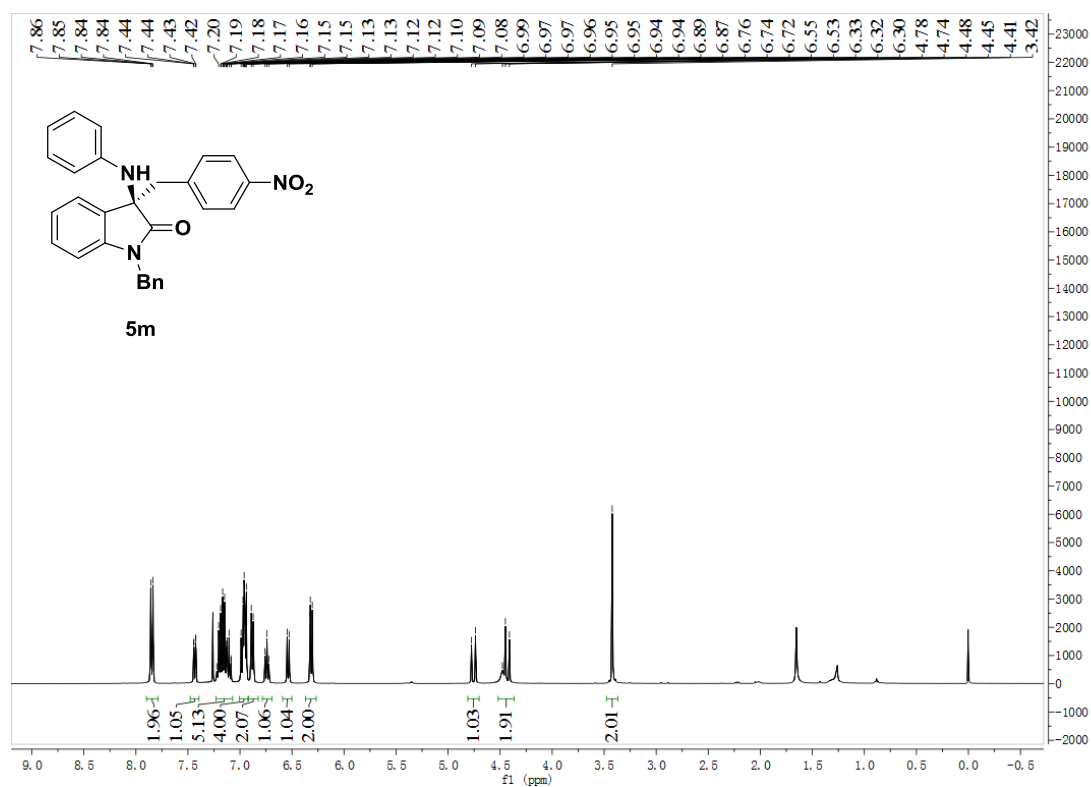

### <sup>13</sup>C NMR spectrum of compound 5m (in CDCl<sub>3</sub>)

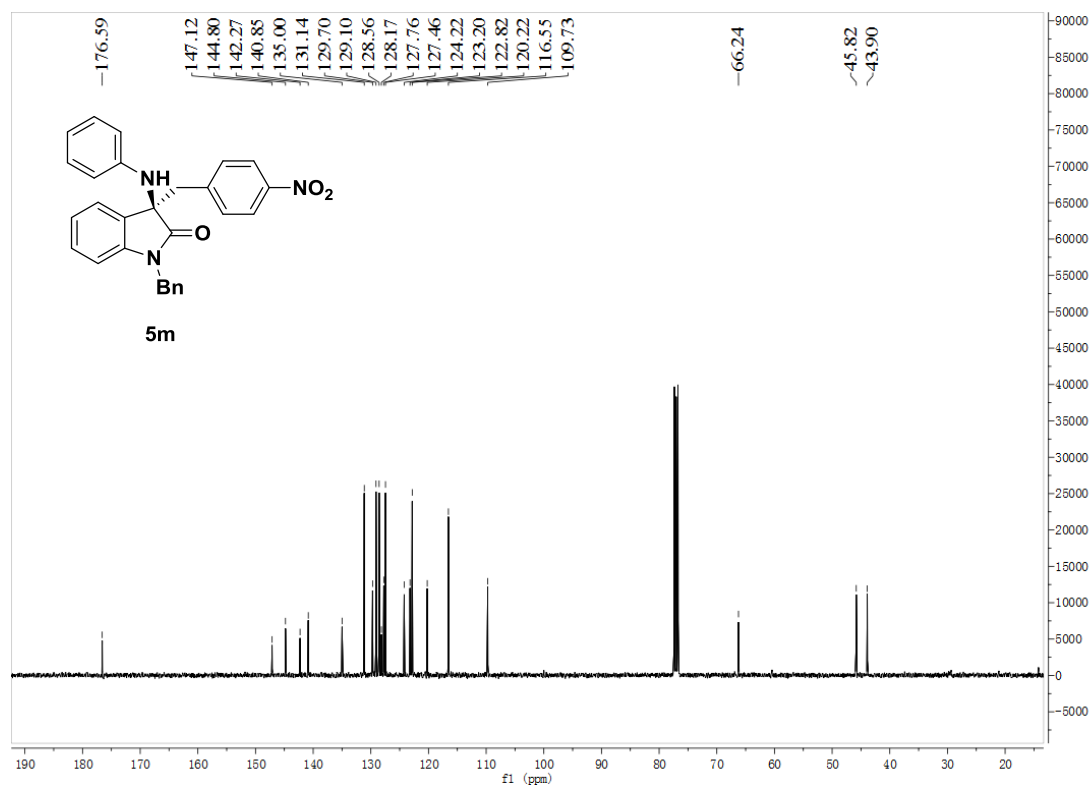

### <sup>1</sup>H NMR spectrum of compound 5n (in CDCl<sub>3</sub>)

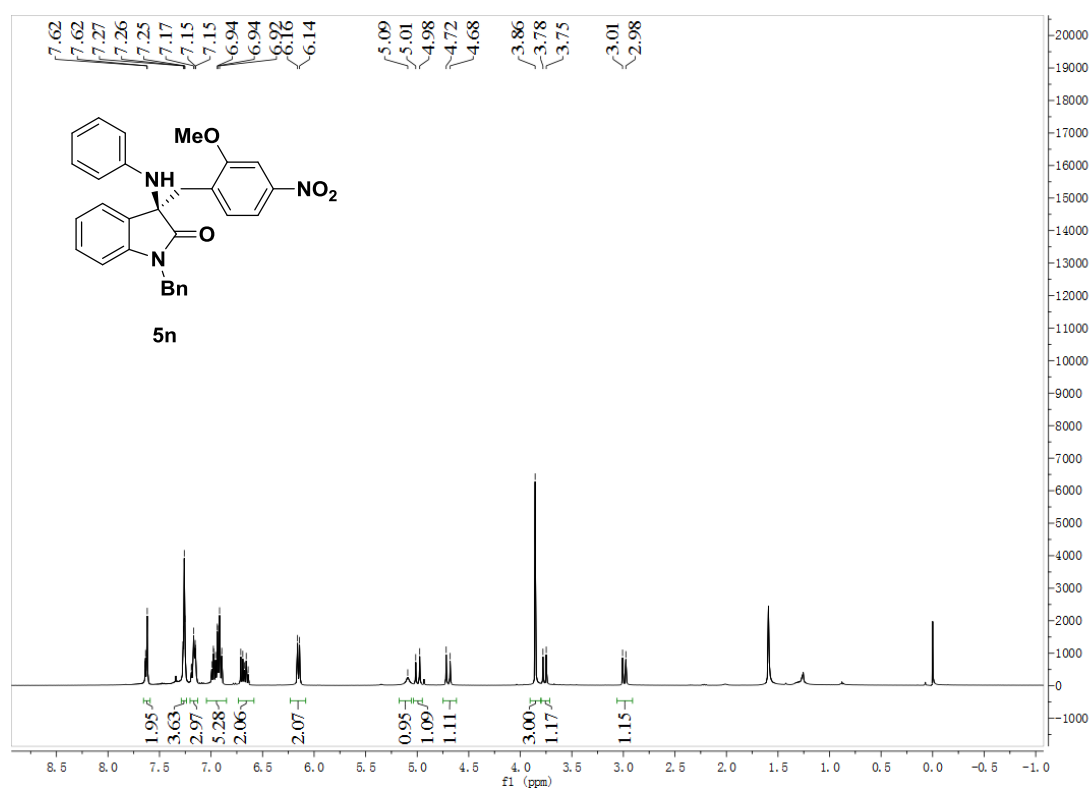

### <sup>13</sup>C NMR spectrum of compound 5n (in CDCl<sub>3</sub>)

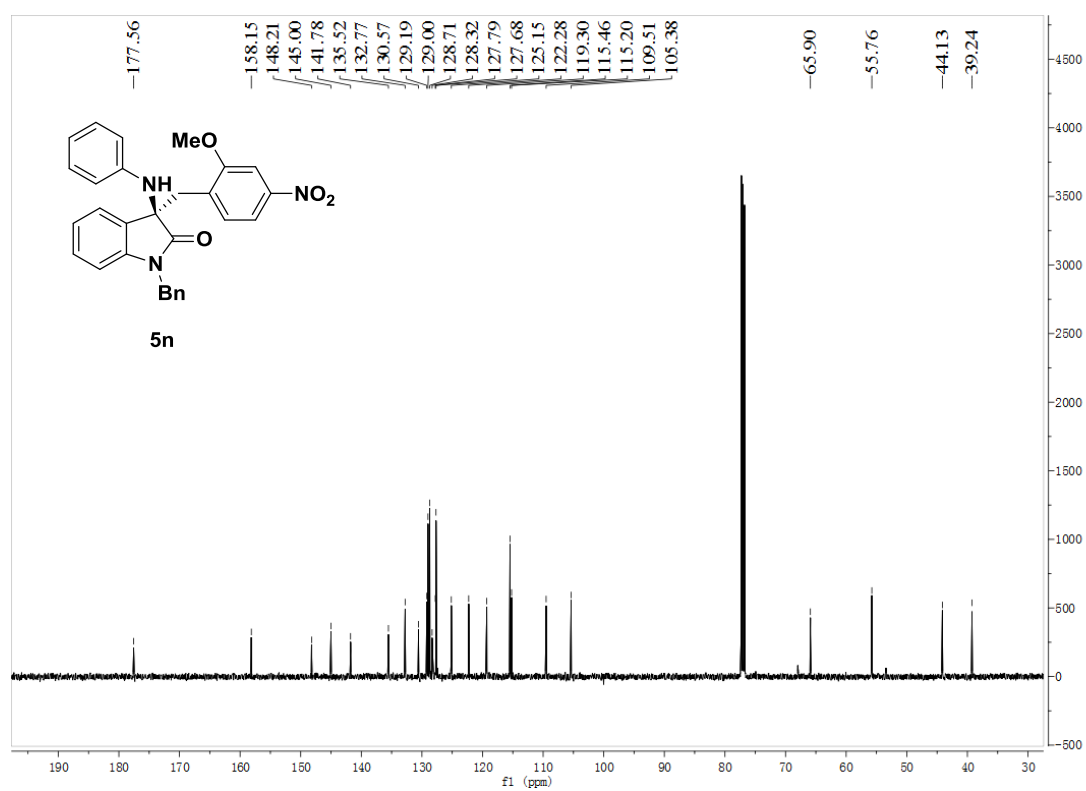

### <sup>1</sup>H NMR spectrum of compound 5o (in CDCl<sub>3</sub>)

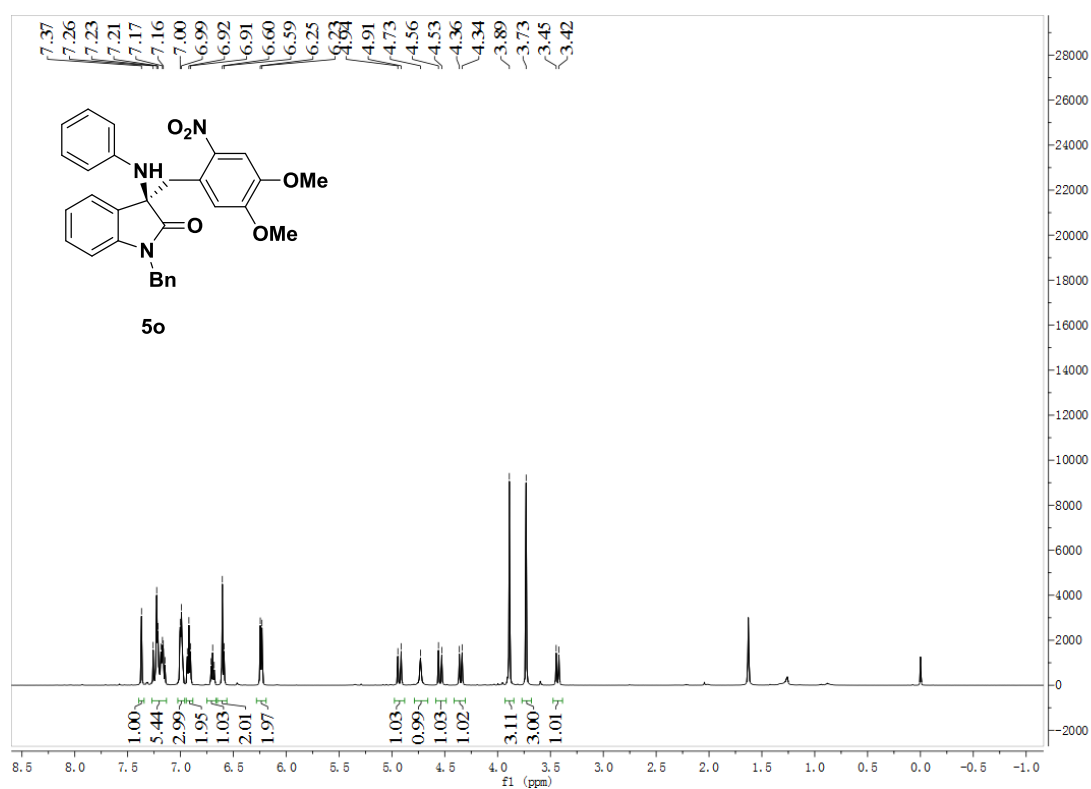

### <sup>13</sup>C NMR spectrum of compound 5o (in CDCl<sub>3</sub>)

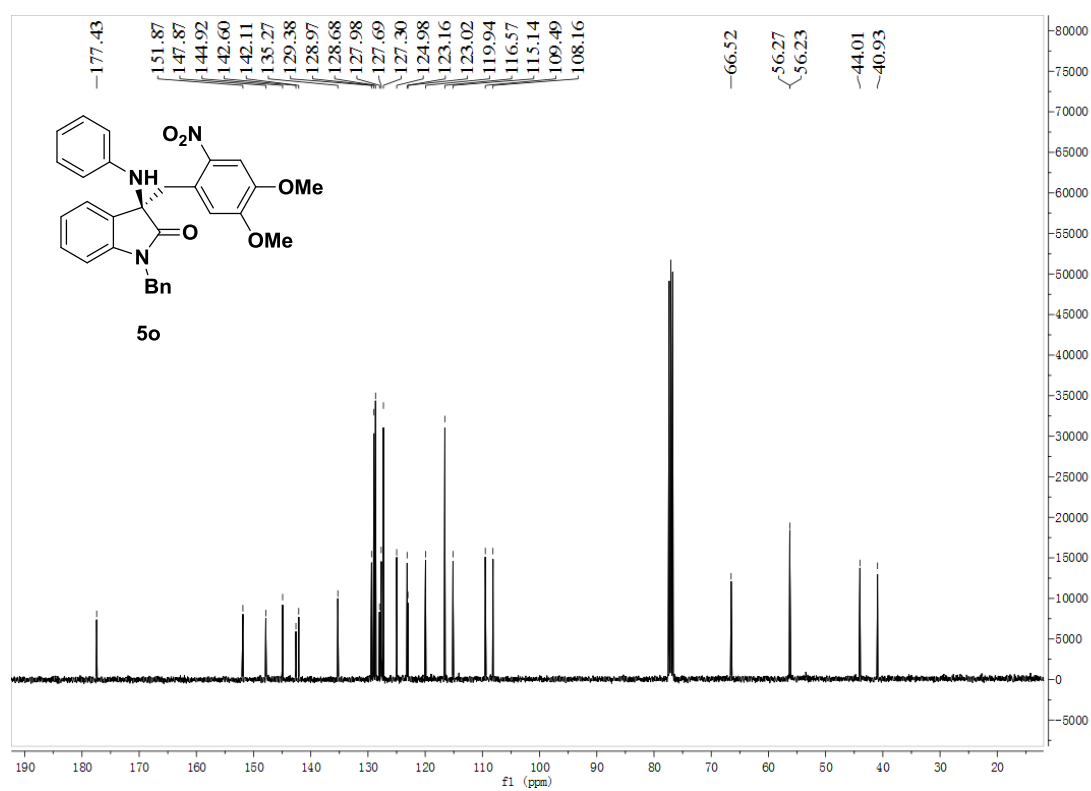

### <sup>1</sup>H NMR spectrum of compound 5p (in CDCl<sub>3</sub>)

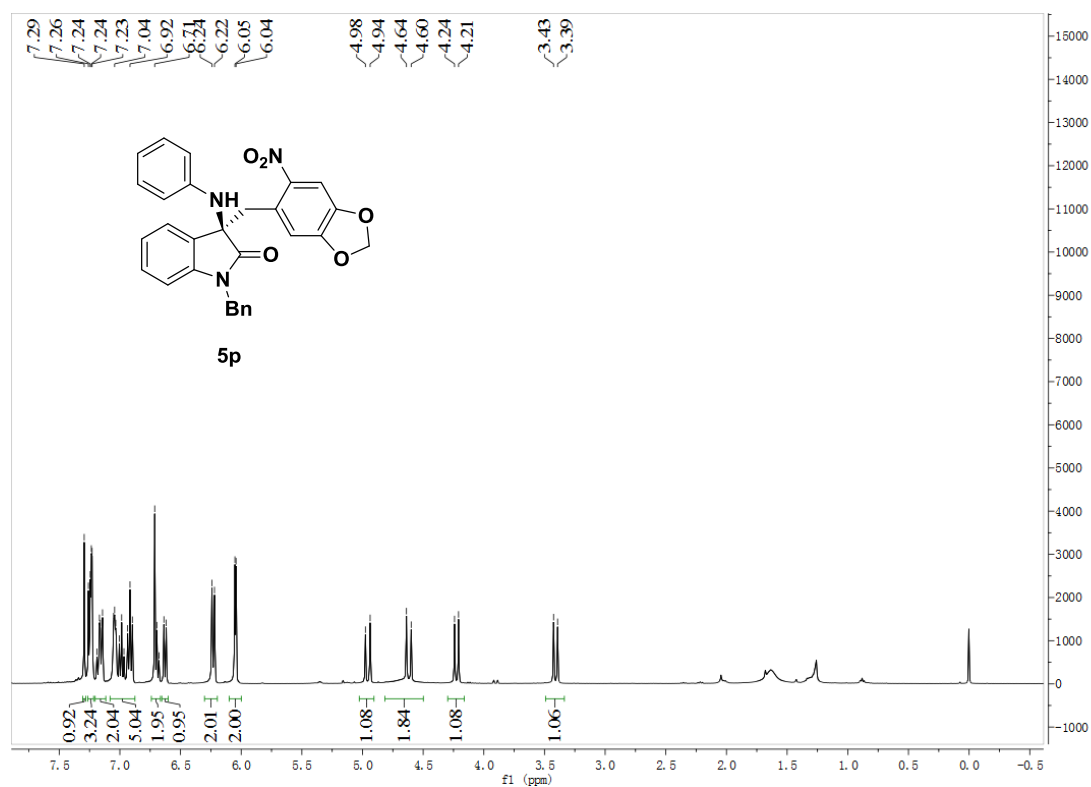

### <sup>13</sup>C NMR spectrum of compound 5p (in CDCl<sub>3</sub>)

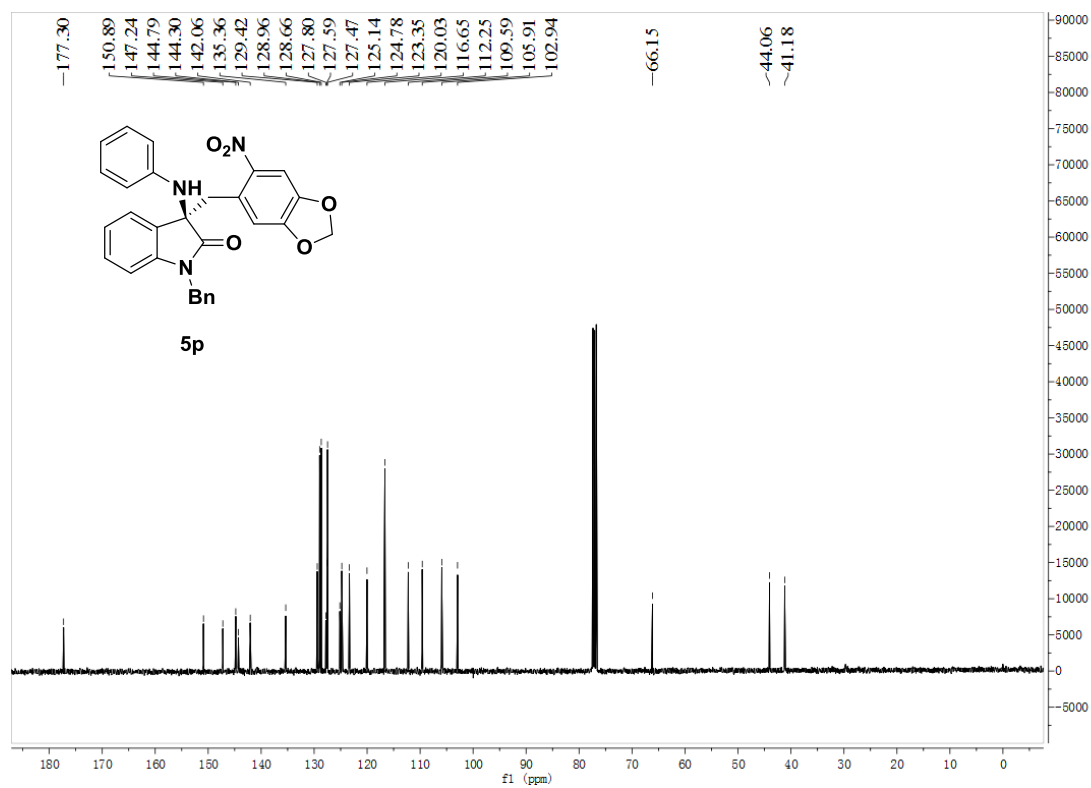



### <sup>1</sup>H NMR spectrum of compound 5q (in CDCl<sub>3</sub>)

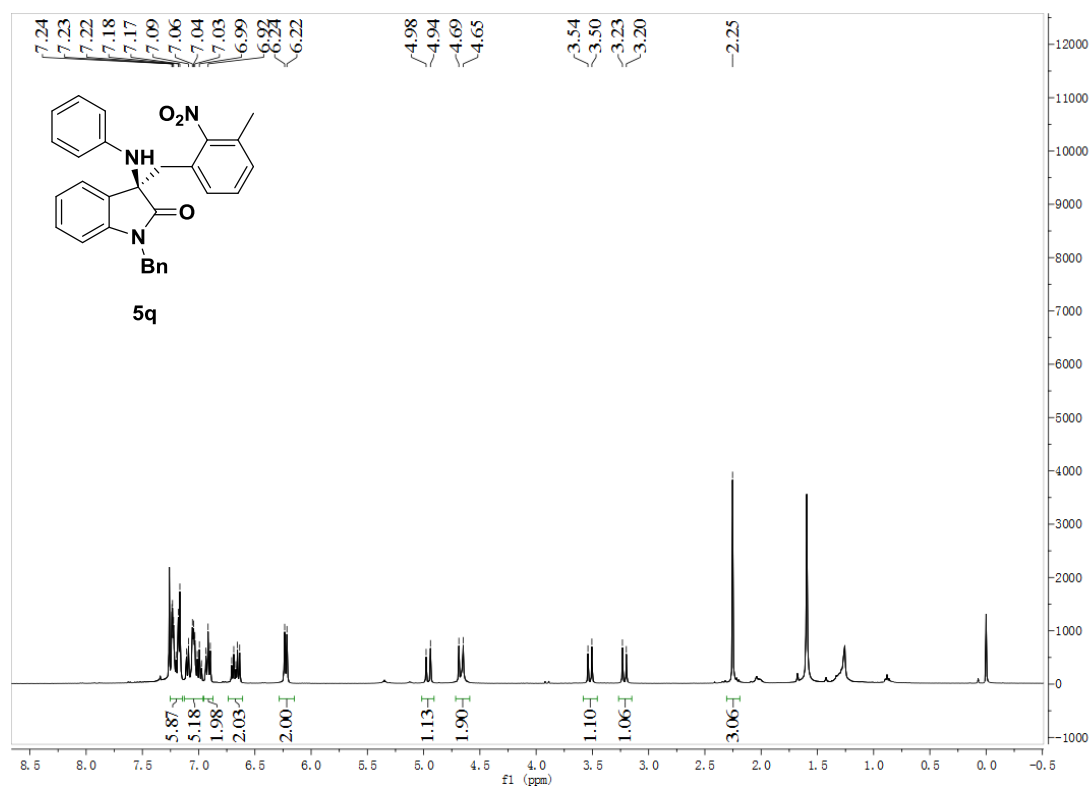

### <sup>13</sup>C NMR spectrum of compound 5q (in CDCl<sub>3</sub>)

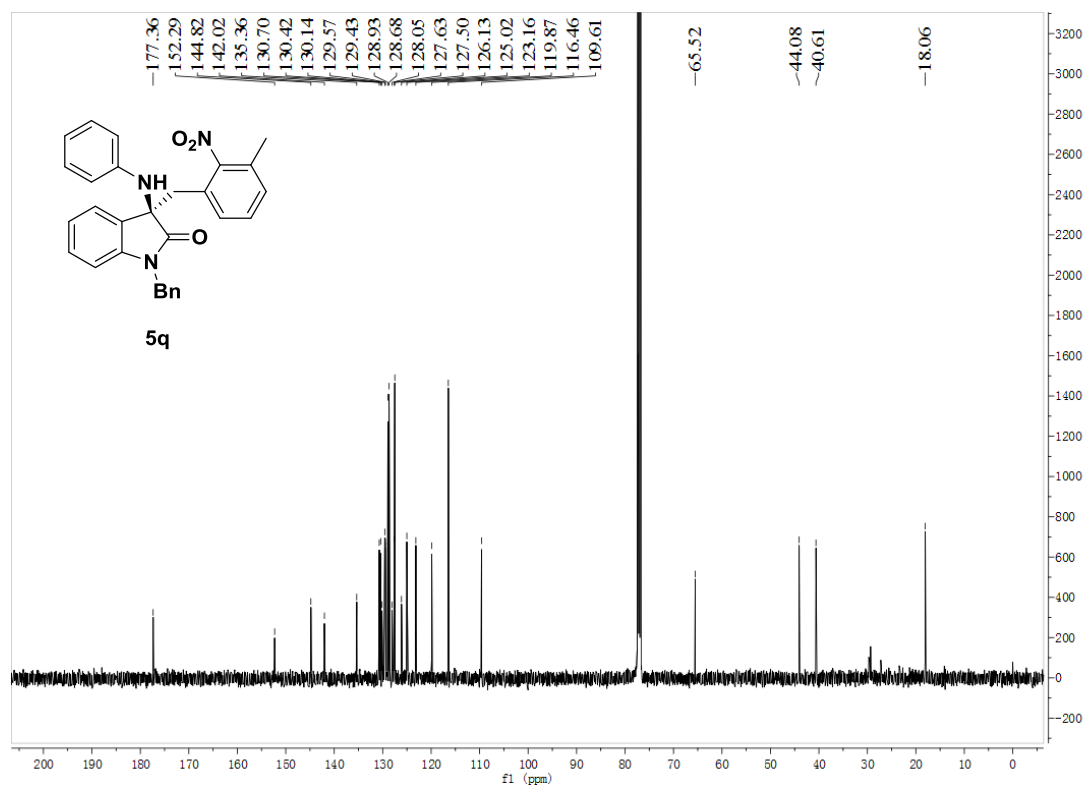

### <sup>1</sup>H NMR spectrum of compound 5r (in CDCl<sub>3</sub>)

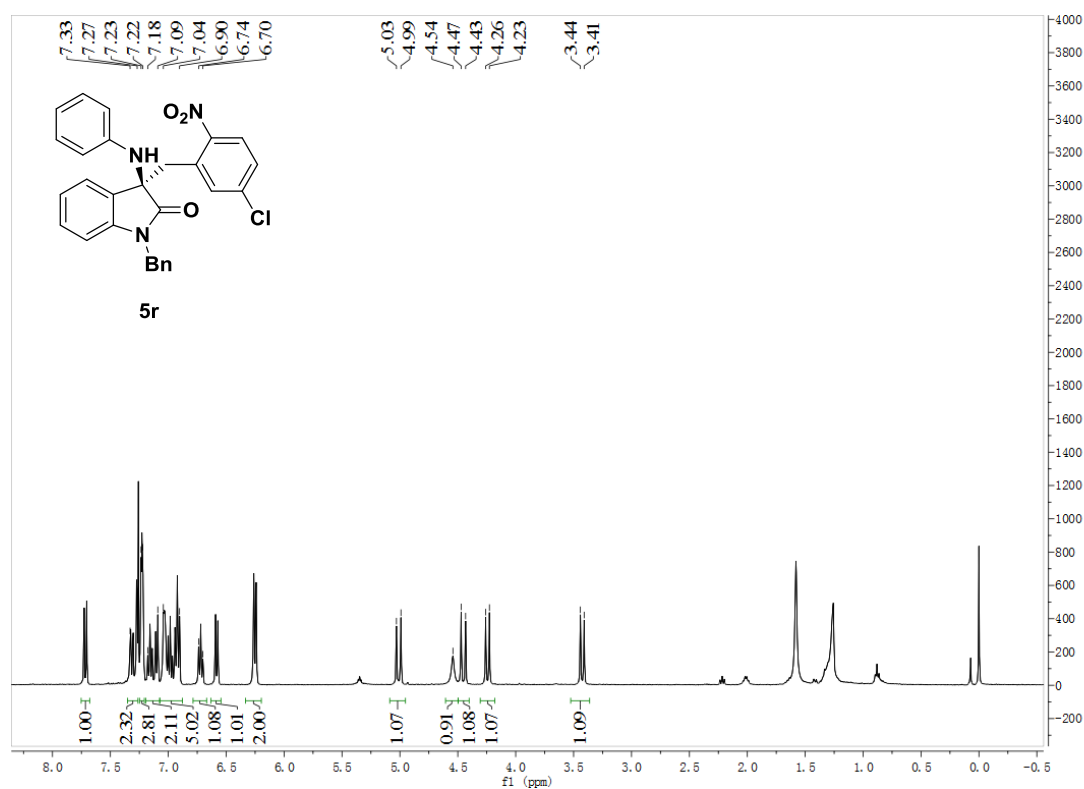

### <sup>13</sup>C NMR spectrum of compound 5r (in CDCl<sub>3</sub>)

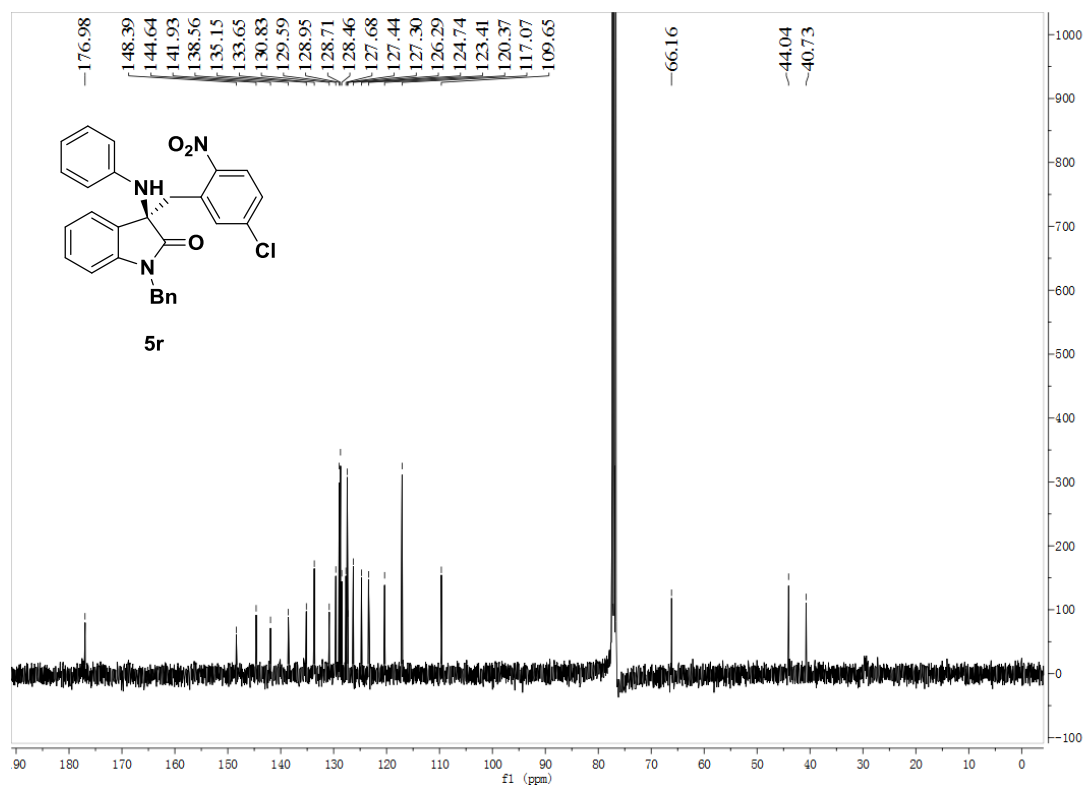

### <sup>1</sup>H NMR spectrum of compound 6a (in CDCl<sub>3</sub>)

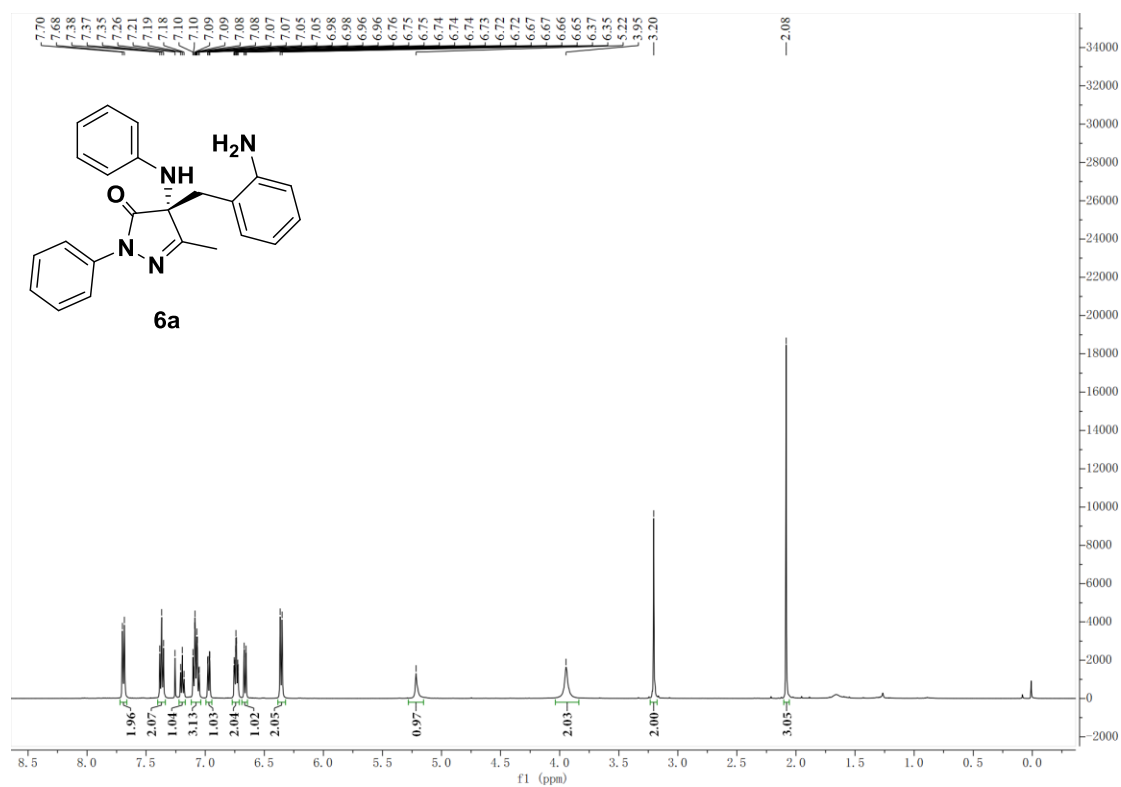

### <sup>13</sup>C NMR spectrum of compound 6a (in CDCl<sub>3</sub>)

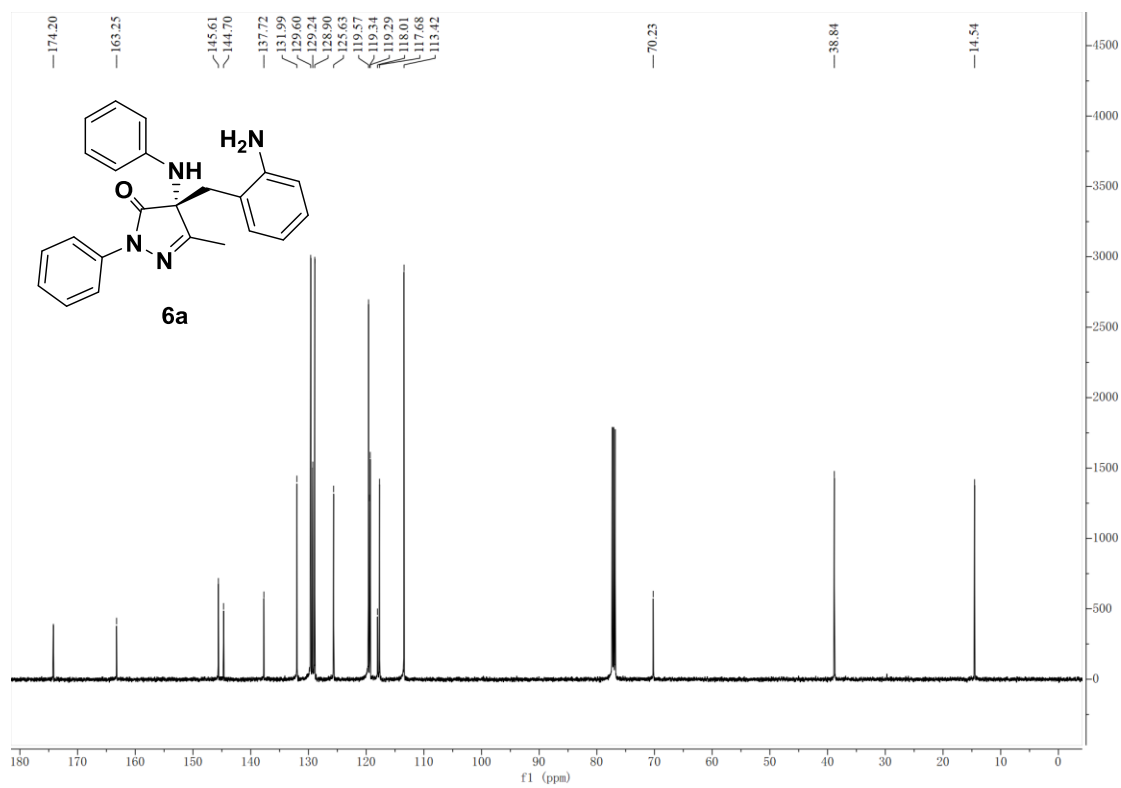

**<sup>1</sup>H NMR spectrum of compound 8a (in CDCl<sub>3</sub>)**

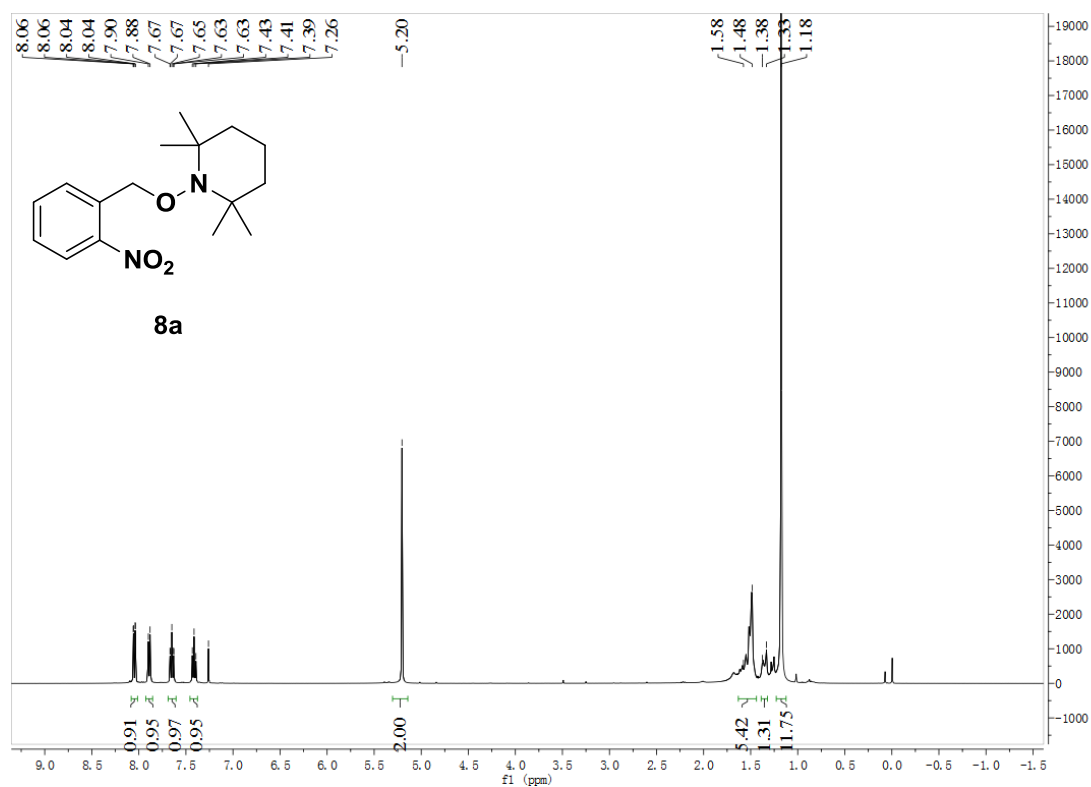

**<sup>13</sup>C NMR spectrum of compound 8a (in CDCl<sub>3</sub>)**

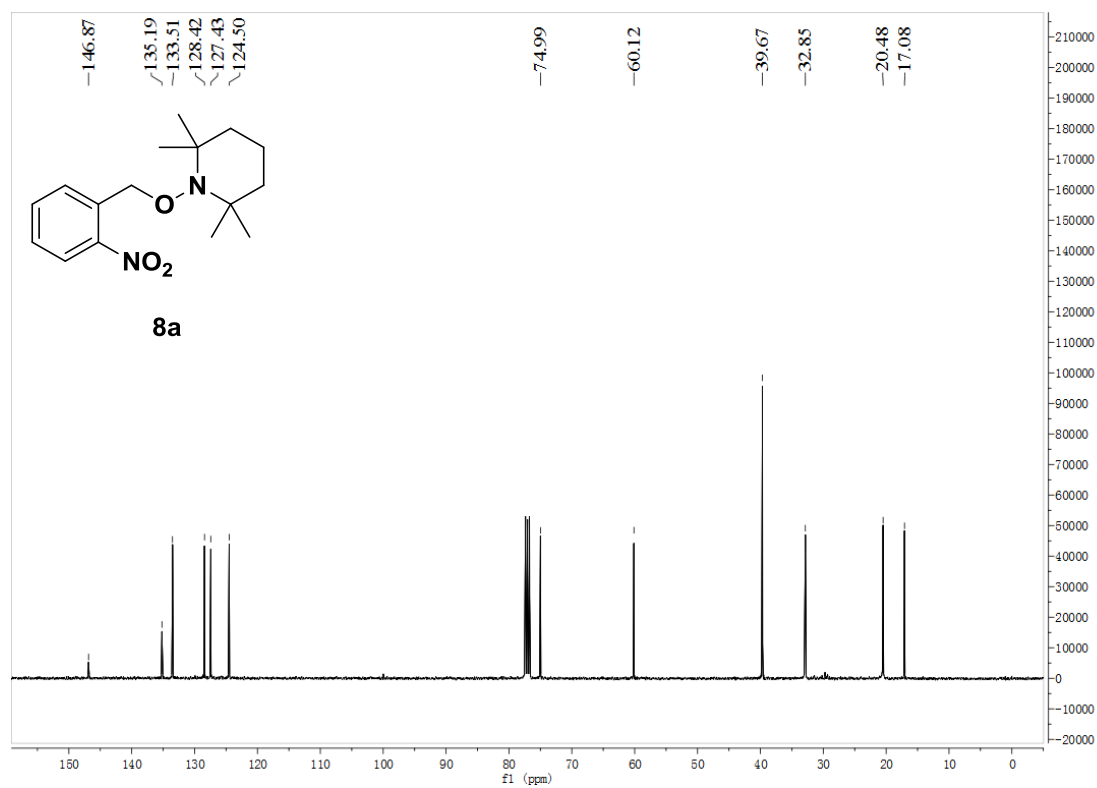

## 9. Copies of HPLC Data

### HPLC spectra of 3a racemate

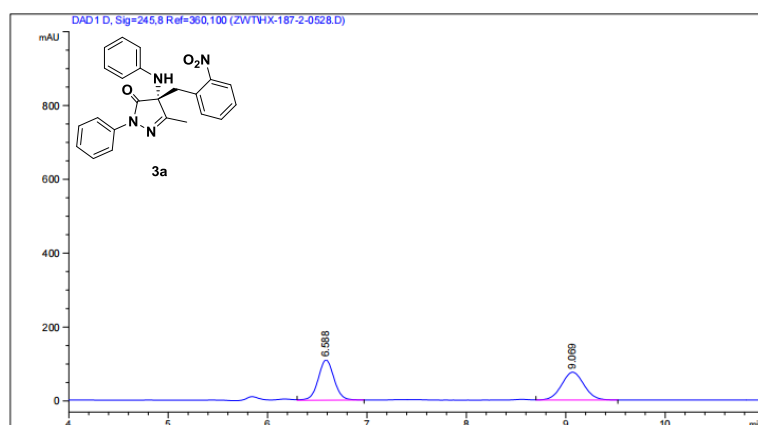

| Peak # | RetTime [min] | Type | Width [min] | Area mAU *s | Height [mAU] | Area %  |
|--------|---------------|------|-------------|-------------|--------------|---------|
| 1      | 6.588         | VB   | 0.1720      | 1215.56348  | 109.08138    | 50.7254 |
| 2      | 9.069         | VB   | 0.2430      | 1180.79517  | 75.28924     | 49.2746 |

### chiral compound

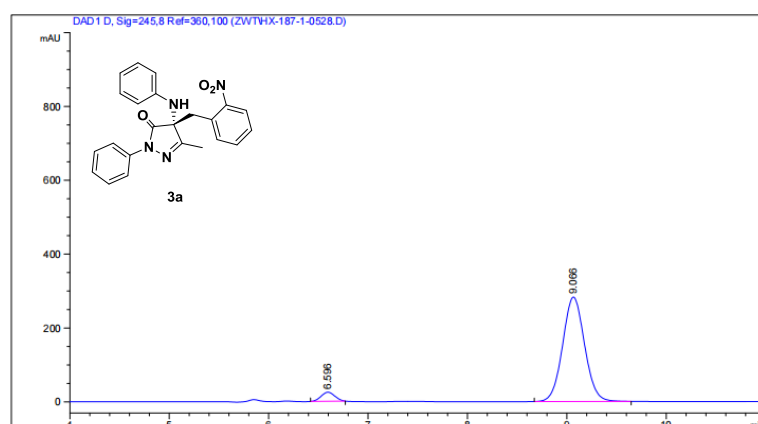

| Peak # | RetTime [min] | Type | Width [min] | Area mAU *s | Height [mAU] | Area %  |
|--------|---------------|------|-------------|-------------|--------------|---------|
| 1      | 6.596         | MM R | 0.1592      | 234.19368   | 24.51466     | 5.1027  |
| 2      | 9.066         | BB   | 0.2376      | 4355.39600  | 282.92685    | 94.8973 |

## HPLC spectra of 3b racemate

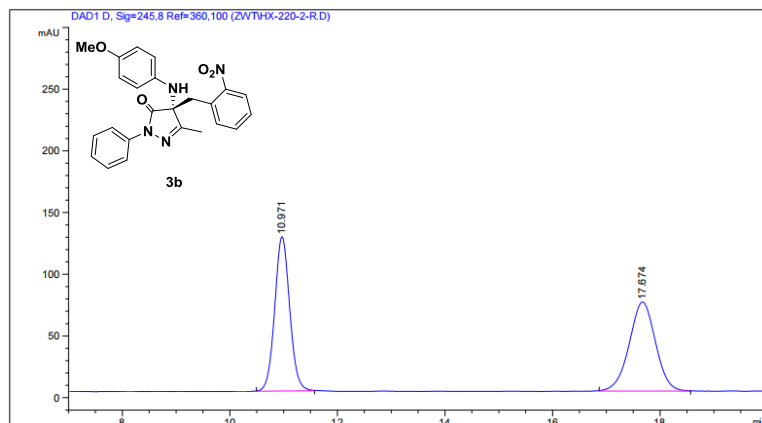

| Peak # | RetTime [min] | Type | Width [min] | Area mAU *s | Height [mAU] | Area %  |
|--------|---------------|------|-------------|-------------|--------------|---------|
| 1      | 10.971        | BB   | 0.2980      | 2421.44141  | 125.01467    | 49.7195 |
| 2      | 17.674        | BB   | 0.5219      | 2448.76025  | 72.16841     | 50.2805 |

## chiral compound

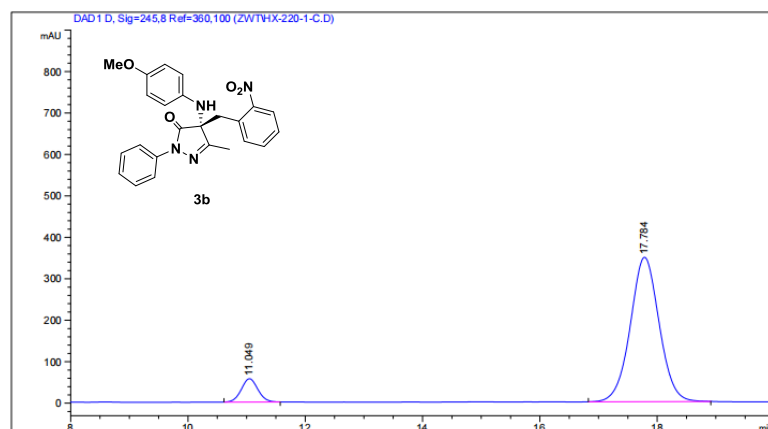

| Peak # | RetTime [min] | Type | Width [min] | Area mAU *s | Height [mAU] | Area %  |
|--------|---------------|------|-------------|-------------|--------------|---------|
| 1      | 11.049        | BB   | 0.3037      | 1110.18506  | 56.39314     | 8.5070  |
| 2      | 17.784        | BB   | 0.5276      | 1.19400e4   | 348.58365    | 91.4930 |

## HPLC spectra of 3c racemate

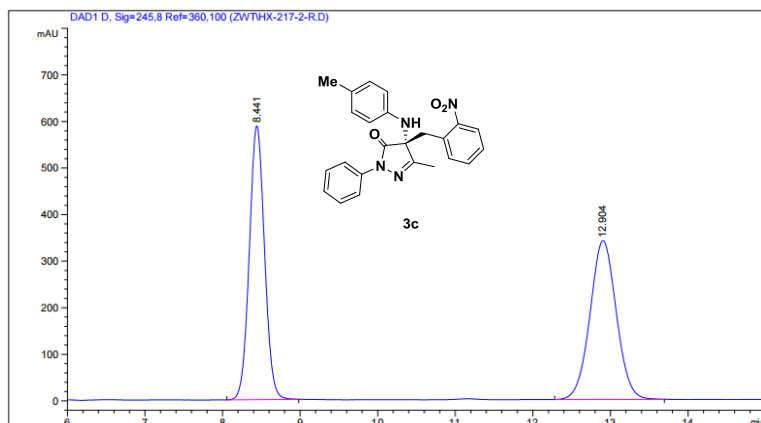

| Peak # | RetTime [min] | Type | Width [min] | Area mAU *s | Height [mAU] | Area %  |
|--------|---------------|------|-------------|-------------|--------------|---------|
| 1      | 8.441         | BB   | 0.2132      | 8026.01416  | 588.28253    | 49.9370 |
| 2      | 12.904        | BB   | 0.3633      | 8046.25488  | 341.00577    | 50.0630 |

## chiral compound

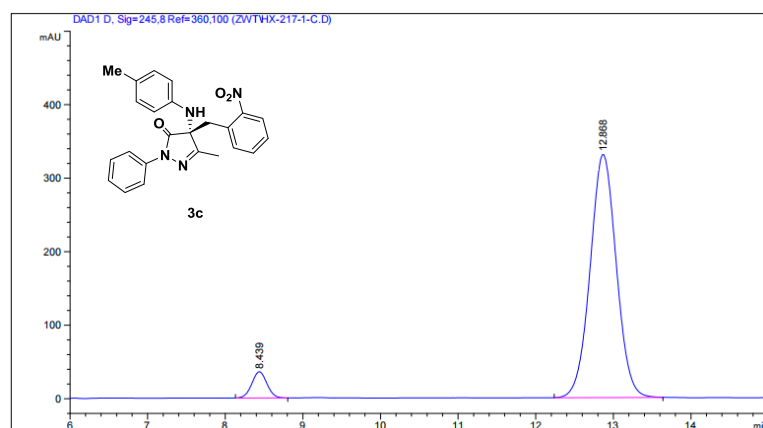

| Peak # | RetTime [min] | Type | Width [min] | Area mAU *s | Height [mAU] | Area %  |
|--------|---------------|------|-------------|-------------|--------------|---------|
| 1      | 8.439         | BB   | 0.2079      | 483.05579   | 35.69959     | 5.8688  |
| 2      | 12.868        | BB   | 0.3612      | 7747.91602  | 330.92142    | 94.1312 |

## HPLC spectra of 3d racemate

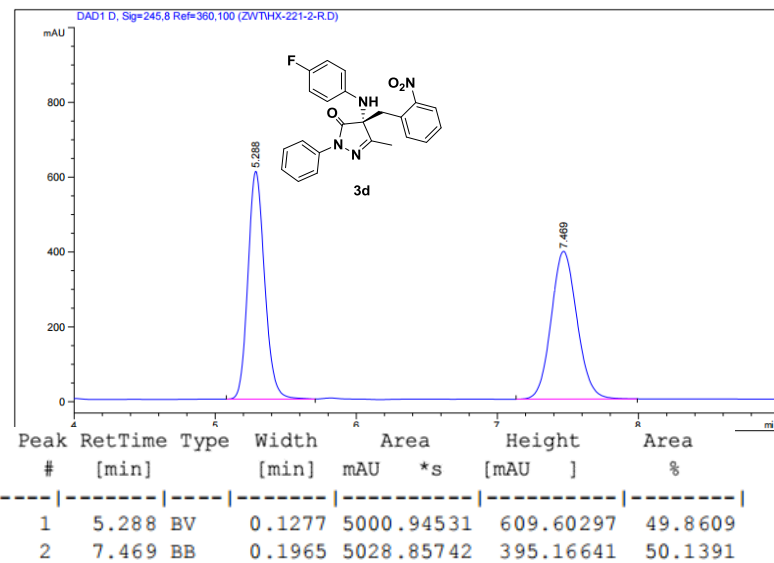

## chiral compound

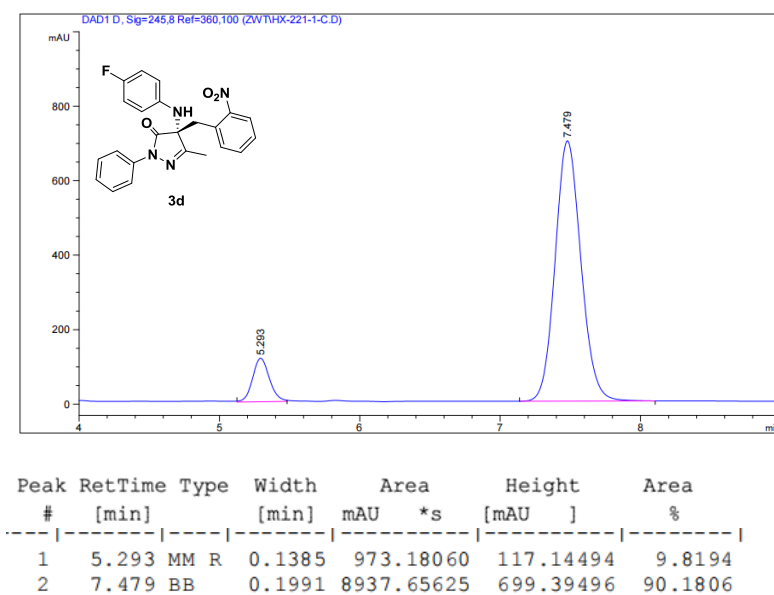



## HPLC spectra of 3e racemate

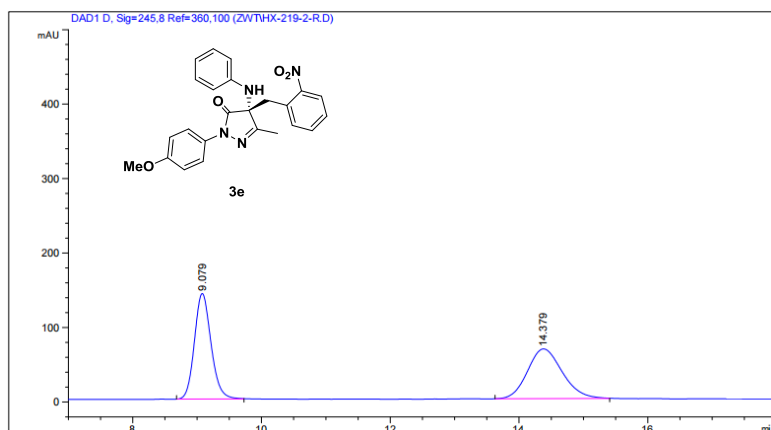

| Peak # | RetTime [min] | Type | Width [min] | Area mAU *s | Height [mAU] | Area %  |
|--------|---------------|------|-------------|-------------|--------------|---------|
| 1      | 9.079         | BB   | 0.2747      | 2537.90186  | 141.86200    | 50.2392 |
| 2      | 14.379        | BB   | 0.5867      | 2513.73950  | 66.84922     | 49.7608 |

## chiral compound

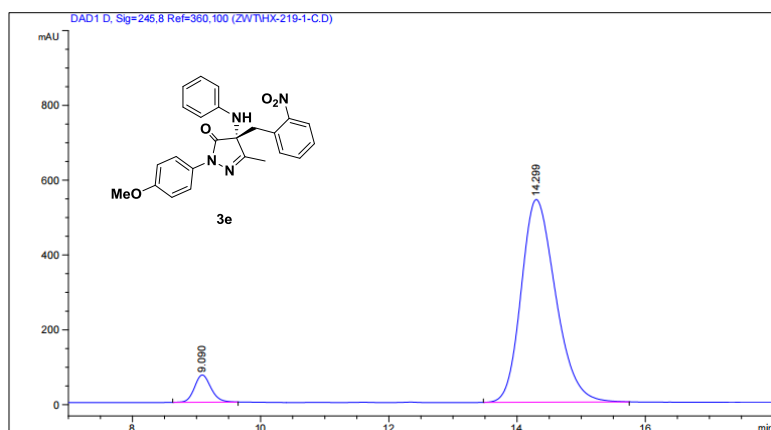

| Peak # | RetTime [min] | Type | Width [min] | Area mAU *s | Height [mAU] | Area %  |
|--------|---------------|------|-------------|-------------|--------------|---------|
| 1      | 9.090         | BB   | 0.2777      | 1311.82446  | 73.00029     | 6.0835  |
| 2      | 14.299        | BB   | 0.5760      | 2.02519e4   | 541.91162    | 93.9165 |

## HPLC spectra of 3f racemate

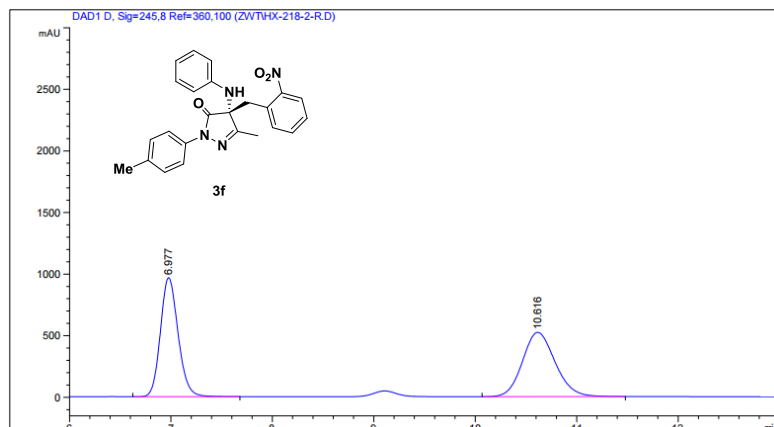

| Peak # | RetTime [min] | Type | Width [min] | Area mAU *s | Height [mAU] | Area %  |
|--------|---------------|------|-------------|-------------|--------------|---------|
| 1      | 6.977         | VB   | 0.1874      | 1.17162e4   | 966.88989    | 50.0512 |
| 2      | 10.616        | BB   | 0.3454      | 1.16922e4   | 521.77979    | 49.9488 |

## chiral compound

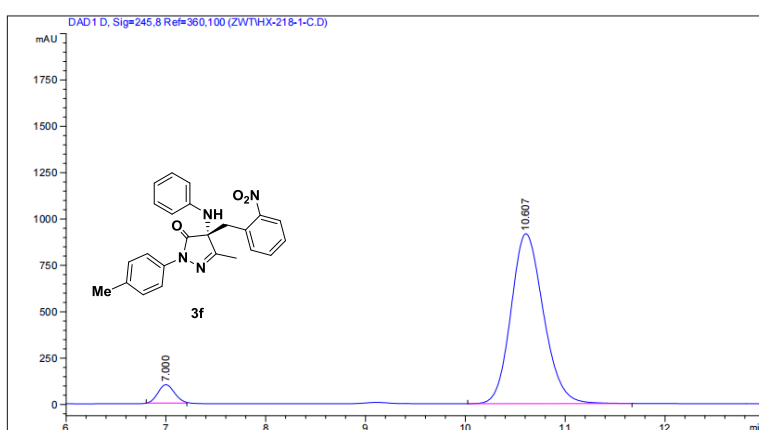

| Peak # | RetTime [min] | Type | Width [min] | Area mAU *s | Height [mAU] | Area %  |
|--------|---------------|------|-------------|-------------|--------------|---------|
| 1      | 7.000         | MM R | 0.1900      | 1129.20422  | 99.04319     | 5.1693  |
| 2      | 10.607        | BB   | 0.3498      | 2.07152e4   | 916.18219    | 94.8307 |

## HPLC spectra of 3g racemate

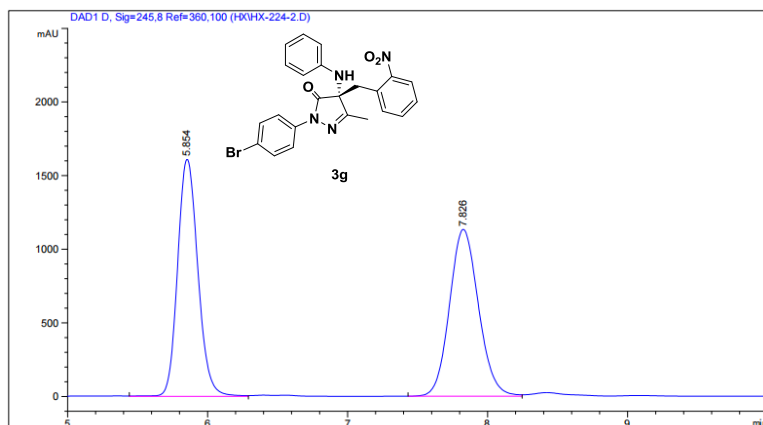

| Peak # | RetTime [min] | Type | Width [min] | Area mAU *s | Height [mAU] | Area %  |
|--------|---------------|------|-------------|-------------|--------------|---------|
| 1      | 5.854         | VV   | 0.1573      | 1.61999e4   | 1611.56738   | 49.7989 |
| 2      | 7.826         | BV   | 0.2240      | 1.63308e4   | 1133.87744   | 50.2011 |

## chiral compound

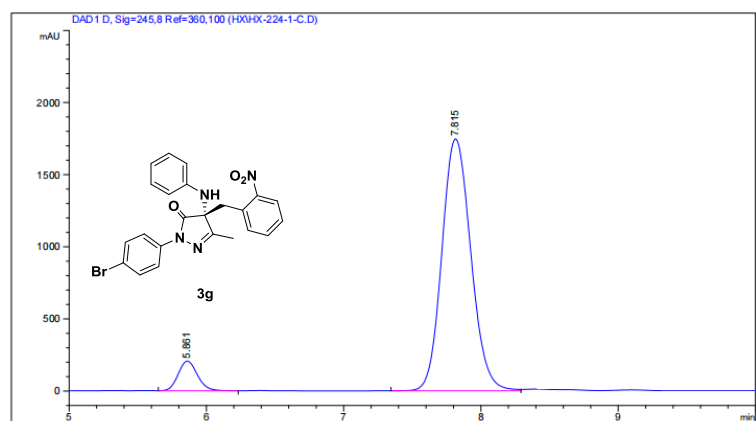

| Peak # | RetTime [min] | Type | Width [min] | Area mAU *s | Height [mAU] | Area %  |
|--------|---------------|------|-------------|-------------|--------------|---------|
| 1      | 5.881         | VB   | 0.1515      | 2000.38879  | 205.59995    | 7.2297  |
| 2      | 7.815         | BV   | 0.2294      | 2.56685e4   | 1747.30322   | 92.7703 |

## HPLC spectra of 3h racemate

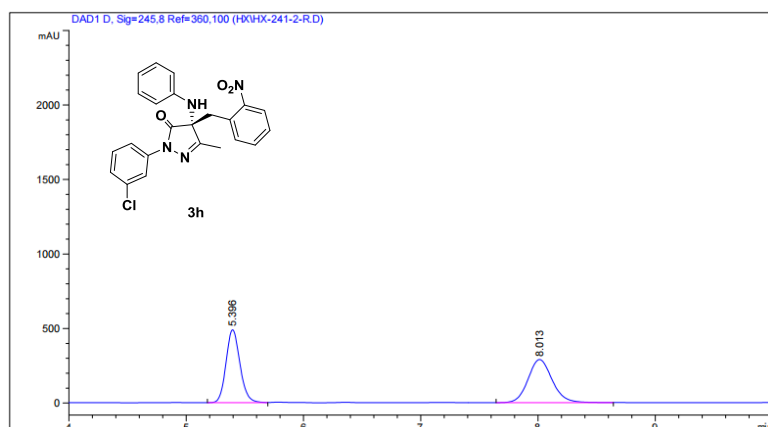

| Peak # | RetTime [min] | Type | Width [min] | Area mAU *s | Height [mAU] | Area %  |
|--------|---------------|------|-------------|-------------|--------------|---------|
| 1      | 5.396         | BV   | 0.1266      | 4052.34497  | 489.59232    | 49.4626 |
| 2      | 8.013         | BB   | 0.2188      | 4140.40381  | 289.51068    | 50.5374 |

## chiral compound

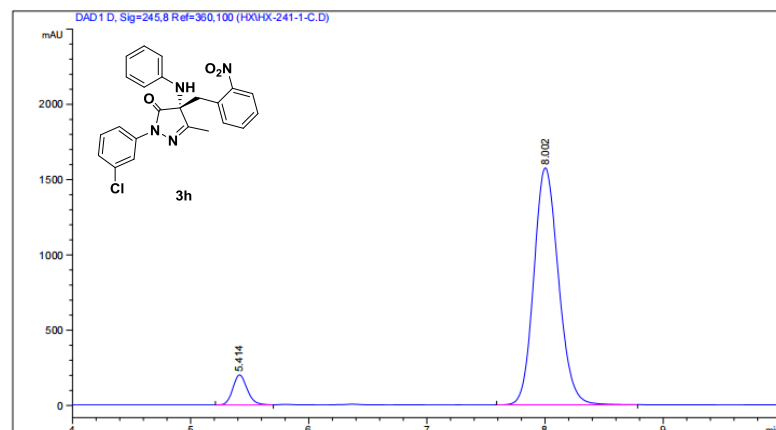

| Peak # | RetTime [min] | Type | Width [min] | Area mAU *s | Height [mAU] | Area %  |
|--------|---------------|------|-------------|-------------|--------------|---------|
| 1      | 5.414         | BV   | 0.1311      | 1696.97583  | 199.69678    | 6.9372  |
| 2      | 8.002         | BB   | 0.2227      | 2.27651e4   | 1573.91846   | 93.0628 |

## HPLC spectra of 3i racemate

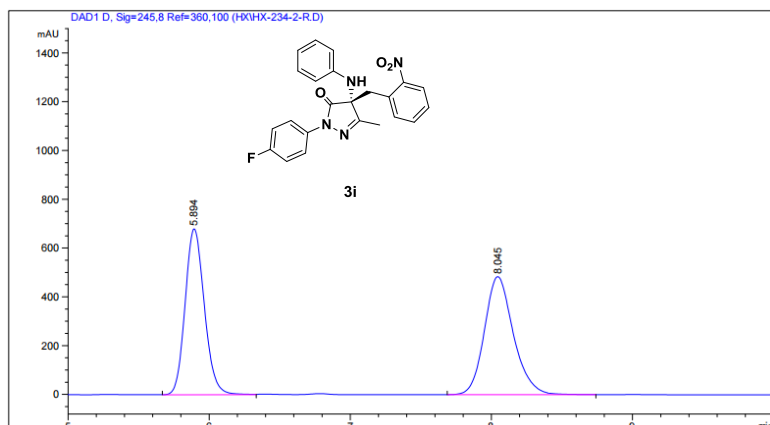

| Peak # | RetTime [min] | Type | Width [min] | Area mAU *s | Height [mAU] | Area %  |
|--------|---------------|------|-------------|-------------|--------------|---------|
| 1      | 5.894         | VB   | 0.1487      | 6458.96924  | 680.54382    | 48.3370 |
| 2      | 8.045         | BB   | 0.2185      | 6903.38916  | 483.67743    | 51.6630 |

## chiral compound

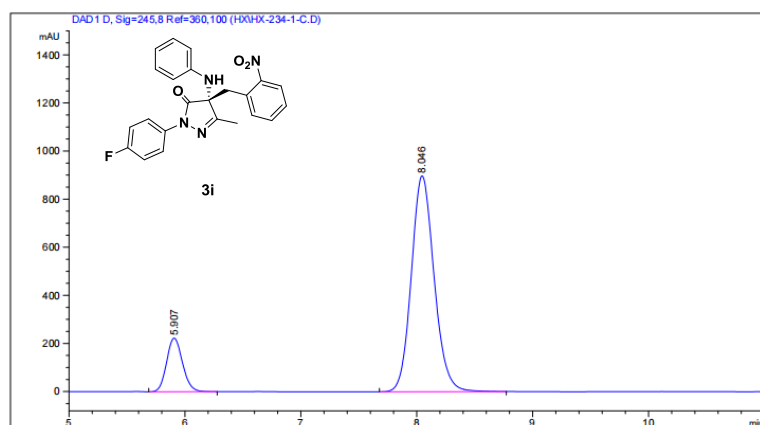

| Peak # | RetTime [min] | Type | Width [min] | Area mAU *s | Height [mAU] | Area %  |
|--------|---------------|------|-------------|-------------|--------------|---------|
| 1      | 5.907         | VB   | 0.1493      | 2131.50000  | 223.44695    | 14.7848 |
| 2      | 8.046         | BB   | 0.2097      | 1.22854e4   | 897.72150    | 85.2152 |

## HPLC spectra of 3j racemate

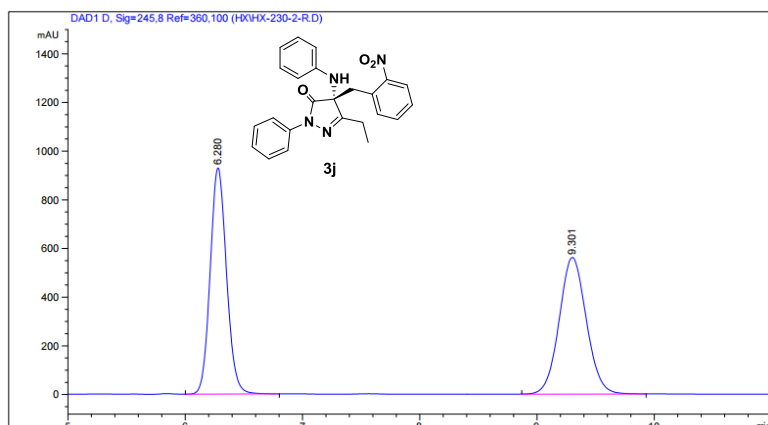

| Peak # | RetTime [min] | Type | Width [min] | Area mAU *s | Height [mAU] | Area %  |
|--------|---------------|------|-------------|-------------|--------------|---------|
| 1      | 6.280         | VB   | 0.1490      | 9009.25879  | 930.17627    | 49.9275 |
| 2      | 9.301         | BB   | 0.2498      | 9035.42285  | 561.21057    | 50.0725 |

## chiral compound

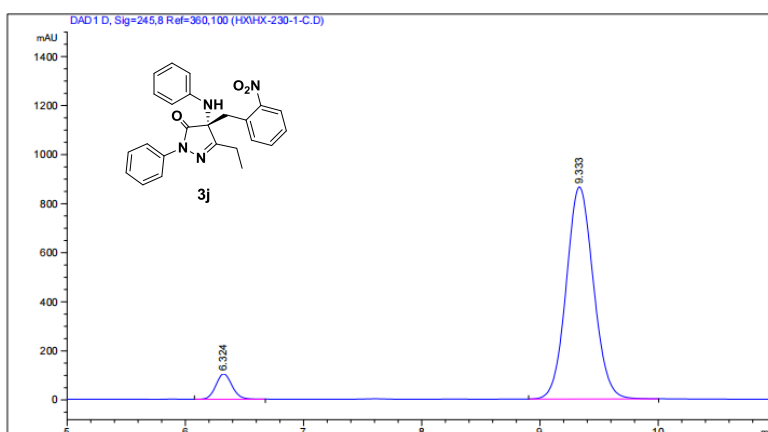

| Peak # | RetTime [min] | Type | Width [min] | Area mAU *s | Height [mAU] | Area %  |
|--------|---------------|------|-------------|-------------|--------------|---------|
| 1      | 6.324         | VB   | 0.1471      | 984.69659   | 103.44350    | 6.6570  |
| 2      | 9.333         | BB   | 0.2463      | 1.38073e4   | 864.87512    | 93.3430 |

## HPLC spectra of 3k racemate

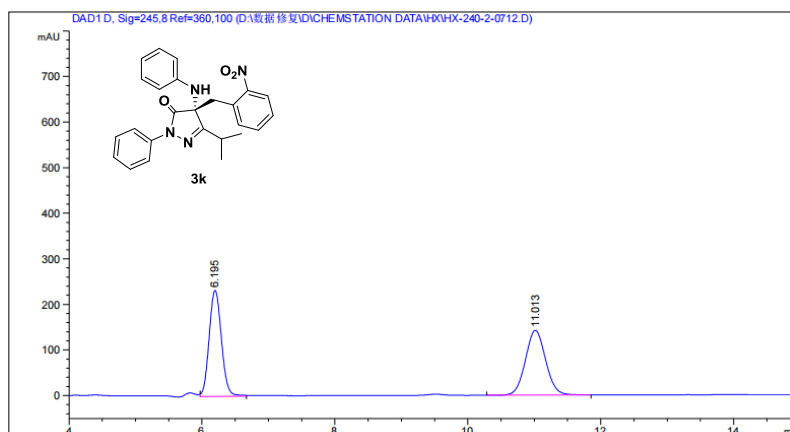

| Peak # | RetTime [min] | Type | Width [min] | Area mAU   | *s | Height [mAU] | Area %  |
|--------|---------------|------|-------------|------------|----|--------------|---------|
| 1      | 6.195         | MM R | 0.2135      | 2977.80054 |    | 232.45711    | 49.8249 |
| 2      | 11.013        | BB   | 0.3284      | 2998.73291 |    | 142.01079    | 50.1751 |

## chiral compound

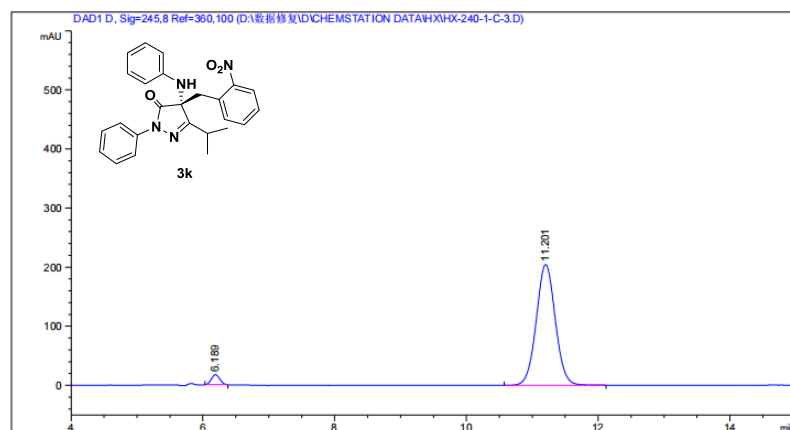

| Peak # | RetTime [min] | Type | Width [min] | Area mAU   | *s | Height [mAU] | Area %  |
|--------|---------------|------|-------------|------------|----|--------------|---------|
| 1      | 6.189         | MM R | 0.1420      | 143.74097  |    | 16.87157     | 3.3831  |
| 2      | 11.201        | BB   | 0.3102      | 4105.01270 |    | 204.44774    | 96.6169 |

## HPLC spectra of 3I racemate

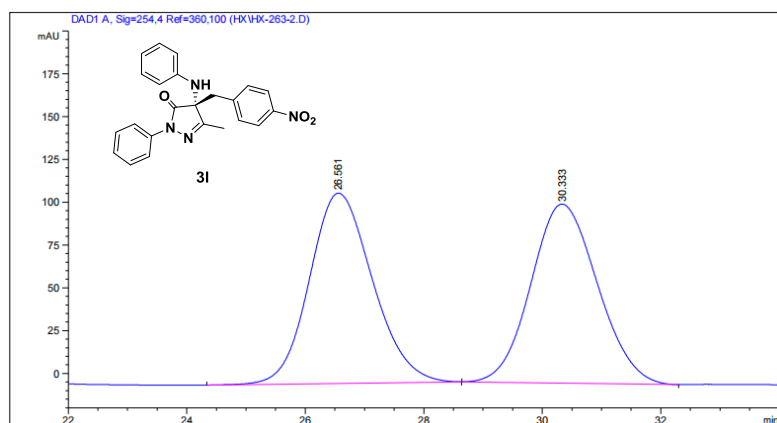

| Peak # | RetTime [min] | Type | Width [min] | Area mAU   | Area *s | Height [mAU] | Area %  |
|--------|---------------|------|-------------|------------|---------|--------------|---------|
| 1      | 26.561        | BB   | 1.1295      | 8197.31250 |         | 111.01217    | 50.1382 |
| 2      | 30.333        | BB   | 1.2020      | 8152.12646 |         | 104.51913    | 49.8618 |

## chiral compound

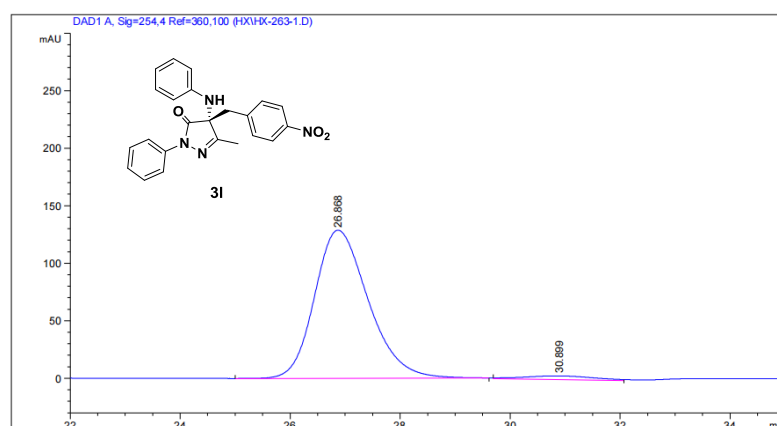

| Peak # | RetTime [min] | Type | Width [min] | Area mAU   | Area *s | Height [mAU] | Area %  |
|--------|---------------|------|-------------|------------|---------|--------------|---------|
| 1      | 26.868        | BB   | 1.0310      | 8726.05859 |         | 128.69531    | 96.8502 |
| 2      | 30.899        | MM R | 1.4619      | 283.78882  |         | 3.23548      | 3.1498  |



## HPLC spectra of 3m racemate

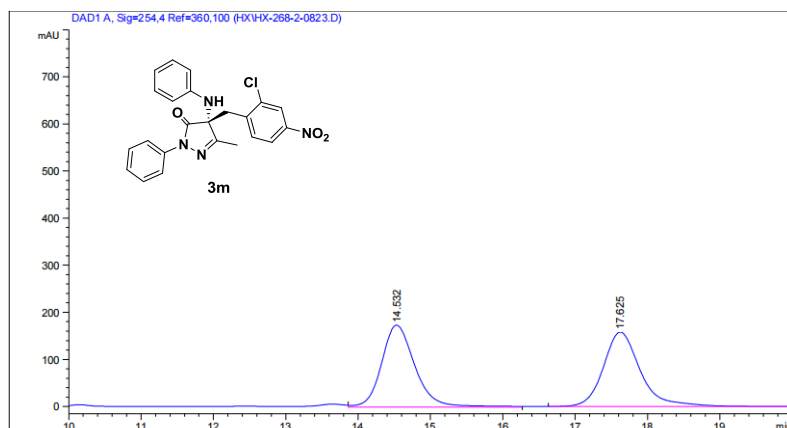

| Peak # | RetTime [min] | Type | Width [min] | Area [mAU*s] | Height [mAU] | Area %  |
|--------|---------------|------|-------------|--------------|--------------|---------|
| 1      | 14.532        | MM R | 0.5366      | 5597.83691   | 173.85474    | 49.9803 |
| 2      | 17.625        | BB   | 0.5362      | 5602.24512   | 157.80455    | 50.0197 |

## chiral compound

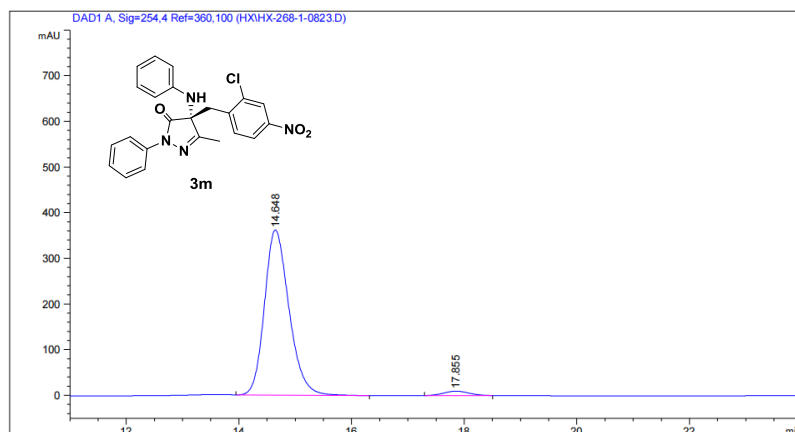

| Peak # | RetTime [min] | Type | Width [min] | Area      | Height    | Area    |
|--------|---------------|------|-------------|-----------|-----------|---------|
| 1      | 14.648        | BB   | 0.4635      | 1.09584e4 | 361.66602 | 97.1376 |
| 2      | 17.855        | MM R | 0.5400      | 322.91187 | 9.96678   | 2.8624  |

## HPLC spectra of 3n racemate

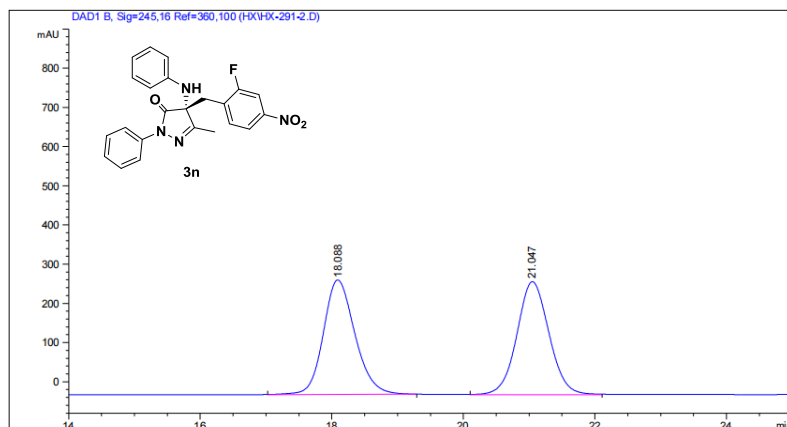

| Peak # | RetTime [min] | Type | Width [min] | Area mAU *s | Height [mAU] | Area %  |
|--------|---------------|------|-------------|-------------|--------------|---------|
| 1      | 18.088        | MM R | 0.5569      | 9762.43164  | 292.15189    | 49.9277 |
| 2      | 21.047        | MM R | 0.5660      | 9790.69141  | 288.29462    | 50.0723 |

## chiral compound

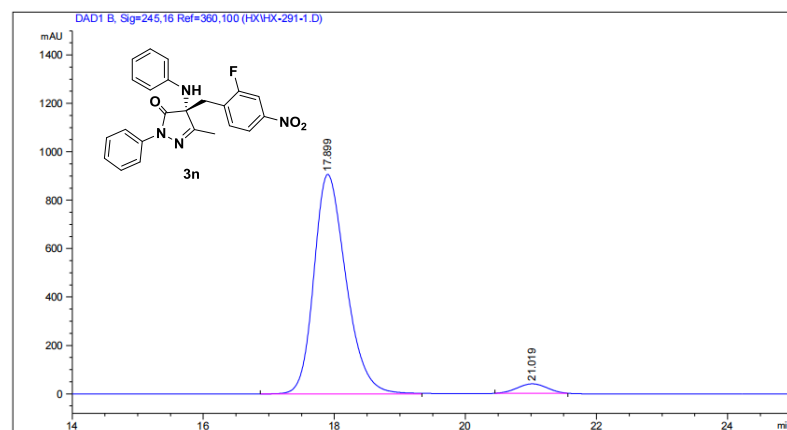

| Peak # | RetTime [min] | Type | Width [min] | Area mAU *s | Height [mAU] | Area %  |
|--------|---------------|------|-------------|-------------|--------------|---------|
| 1      | 17.899        | MM R | 0.5686      | 3.09497e4   | 907.25391    | 96.1146 |
| 2      | 21.019        | MM R | 0.5297      | 1251.11536  | 39.36663     | 3.8854  |

## HPLC spectra of 3o racemate

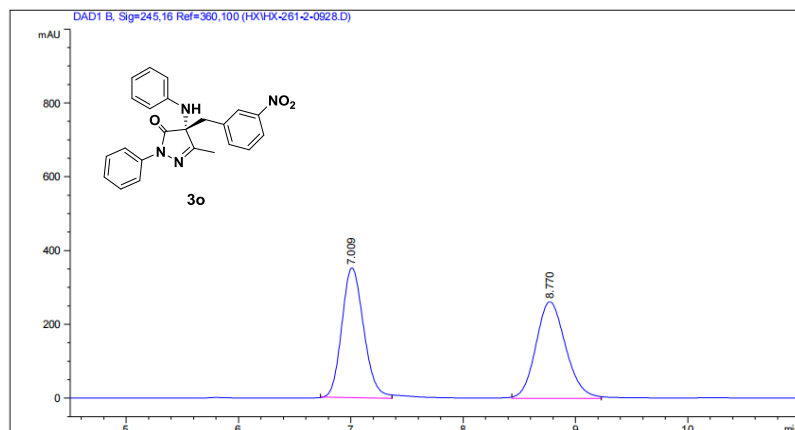

| Peak # | RetTime [min] | Type | Width [min] | Area mAU *s | Height [mAU] | Area %  |
|--------|---------------|------|-------------|-------------|--------------|---------|
| 1      | 7.009         | MM R | 0.2262      | 4778.79541  | 352.04843    | 49.6384 |
| 2      | 8.770         | MM R | 0.3076      | 4848.41406  | 262.66681    | 50.3616 |

## chiral compound

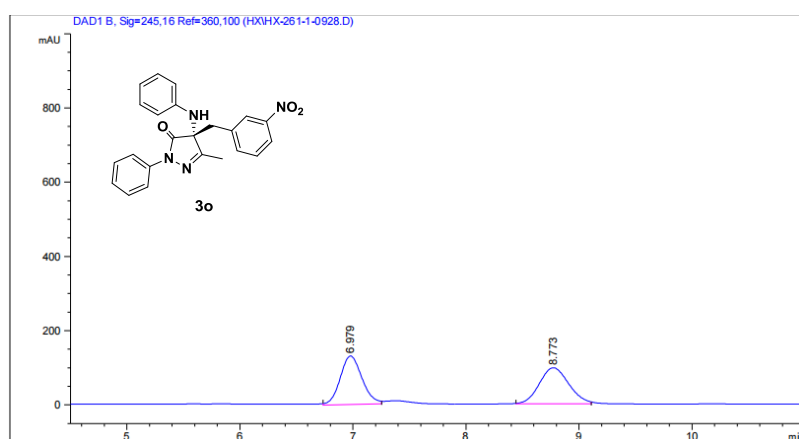

| Peak # | RetTime [min] | Type | Width [min] | Area mAU *s | Height [mAU] | Area %  |
|--------|---------------|------|-------------|-------------|--------------|---------|
| 1      | 6.979         | MM R | 0.2239      | 1759.79102  | 131.01114    | 50.0123 |
| 2      | 8.773         | MM R | 0.3016      | 1758.92810  | 97.19313     | 49.9877 |

## HPLC spectra of 3p racemate

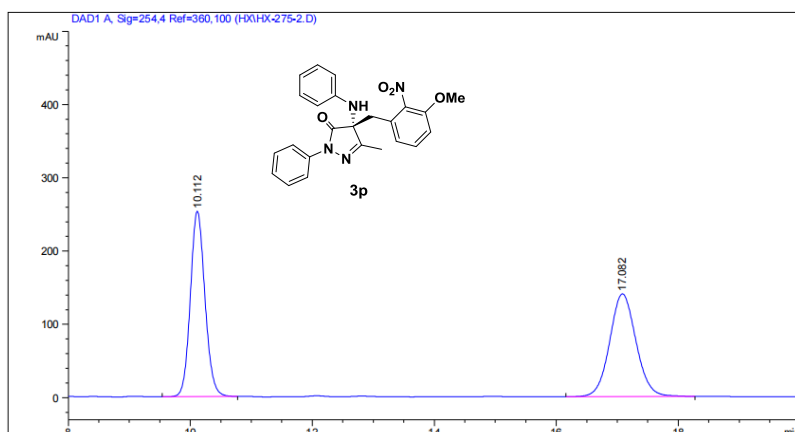

| Peak # | RetTime [min] | Type | Width [min] | Area mAU *s | Height [mAU] | Area %  |
|--------|---------------|------|-------------|-------------|--------------|---------|
| 1      | 10.112        | BB   | 0.2562      | 4210.47217  | 252.98915    | 50.0349 |
| 2      | 17.082        | BB   | 0.4639      | 4204.59961  | 140.18813    | 49.9651 |

## chiral compound

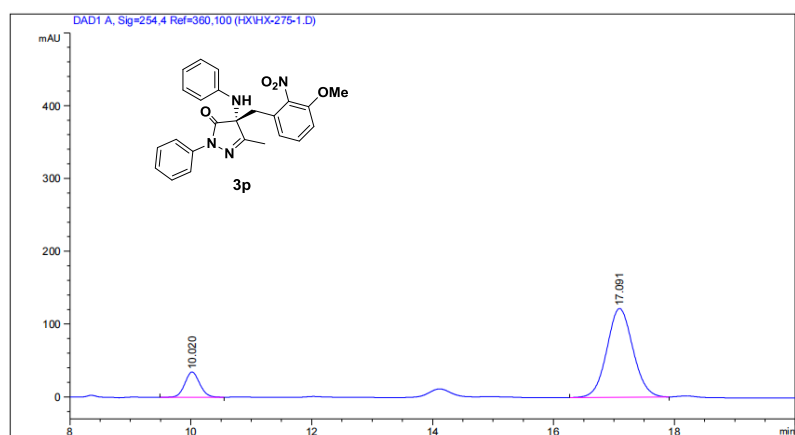

| Peak # | RetTime [min] | Type | Width [min] | Area mAU *s | Height [mAU] | Area %  |
|--------|---------------|------|-------------|-------------|--------------|---------|
| 1      | 10.020        | BB   | 0.2650      | 591.05914   | 34.65162     | 13.9389 |
| 2      | 17.091        | BB   | 0.4634      | 3649.30981  | 121.84766    | 86.0611 |

## HPLC spectra of 3q racemate

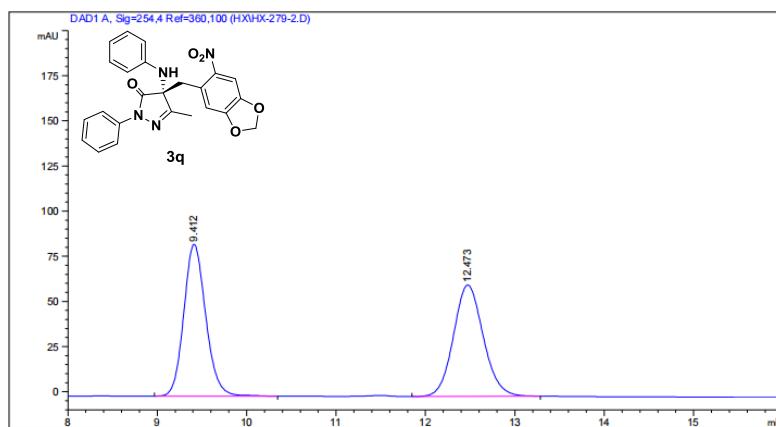

| Peak # | RetTime [min] | Type | Width [min] | Area mAU   | Area *s  | Height [mAU] | Area % |
|--------|---------------|------|-------------|------------|----------|--------------|--------|
| 1      | 9.412         | BB   | 0.2640      | 1441.25342 | 84.06722 | 50.2201      |        |
| 2      | 12.473        | BB   | 0.3563      | 1428.61743 | 61.65652 | 49.7799      |        |

## chiral compound

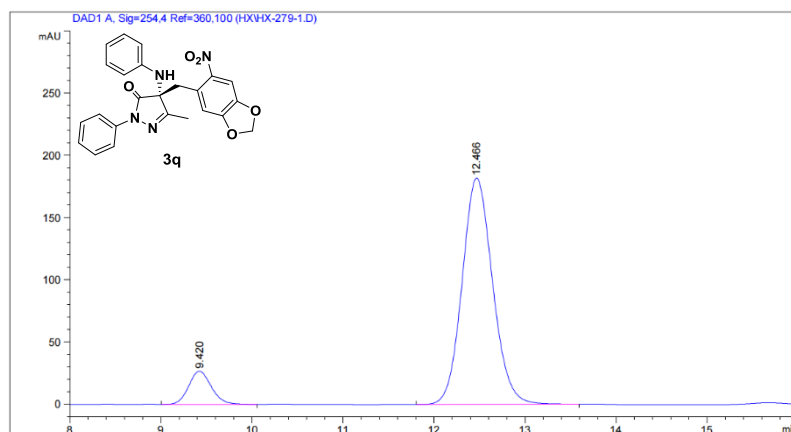

| Peak # | RetTime [min] | Type | Width [min] | Area mAU   | Area *s   | Height [mAU] | Area % |
|--------|---------------|------|-------------|------------|-----------|--------------|--------|
| 1      | 9.420         | BB   | 0.2665      | 463.33389  | 26.68783  | 9.8617       |        |
| 2      | 12.466        | BB   | 0.3595      | 4234.98291 | 181.96730 | 90.1383      |        |

## HPLC spectra of 3r racemate

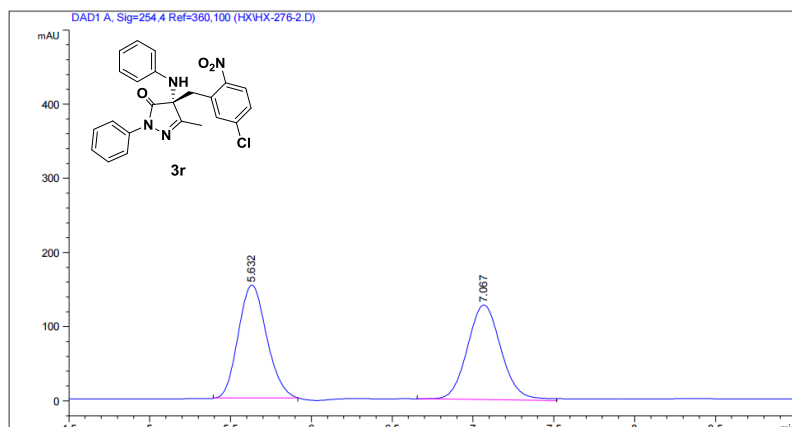

| Peak # | RetTime [min] | Type | Width [min] | Area mAU *s | Height [mAU] | Area %  |
|--------|---------------|------|-------------|-------------|--------------|---------|
| 1      | 5.632         | MM R | 0.2033      | 1858.71509  | 152.37257    | 50.0704 |
| 2      | 7.067         | MM R | 0.2420      | 1853.48804  | 127.63619    | 49.9296 |

## chiral compound

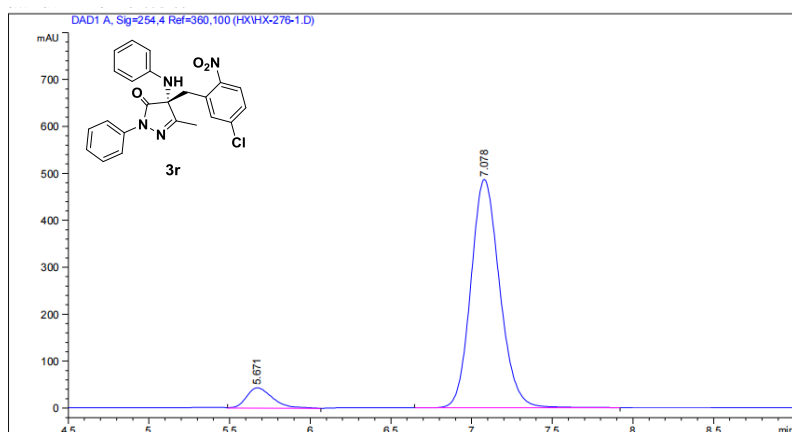

| Peak # | RetTime [min] | Type | Width [min] | Area mAU *s | Height [mAU] | Area %  |
|--------|---------------|------|-------------|-------------|--------------|---------|
| 1      | 5.671         | VB   | 0.1697      | 479.75815   | 43.15161     | 7.3902  |
| 2      | 7.078         | BB   | 0.1902      | 6012.01563  | 486.44424    | 92.6098 |

## HPLC spectra of 3s racemate

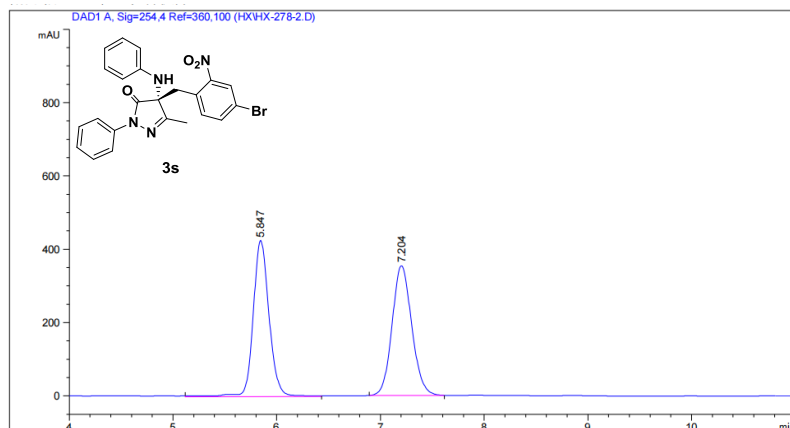

| Peak # | RetTime [min] | Type | Width [min] | Area mAU *s | Height [mAU] | Area %  |
|--------|---------------|------|-------------|-------------|--------------|---------|
| 1      | 5.847         | MM R | 0.1785      | 4562.71436  | 426.00339    | 49.4583 |
| 2      | 7.204         | MM R | 0.2195      | 4662.66846  | 354.03357    | 50.5417 |

## chiral compound

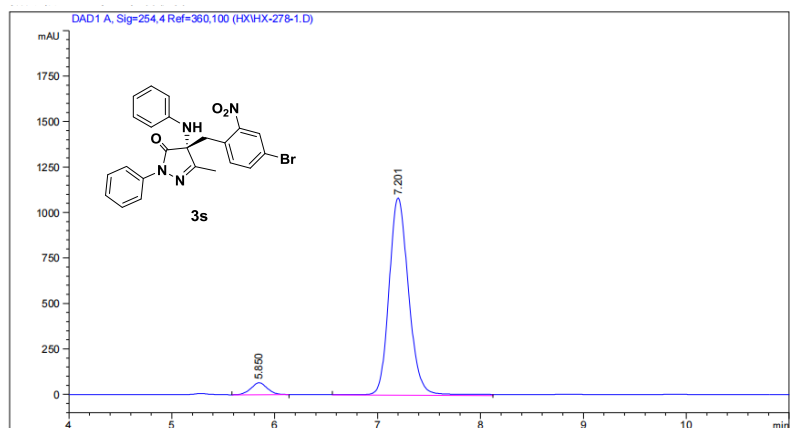

| Peak # | RetTime [min] | Type | Width [min] | Area mAU *s | Height [mAU] | Area %  |
|--------|---------------|------|-------------|-------------|--------------|---------|
| 1      | 5.850         | BB   | 0.1664      | 719.48065   | 65.37186     | 4.7748  |
| 2      | 7.201         | MM R | 0.2208      | 1.43488e4   | 1082.94897   | 95.2252 |

## HPLC spectra of 3t racemate

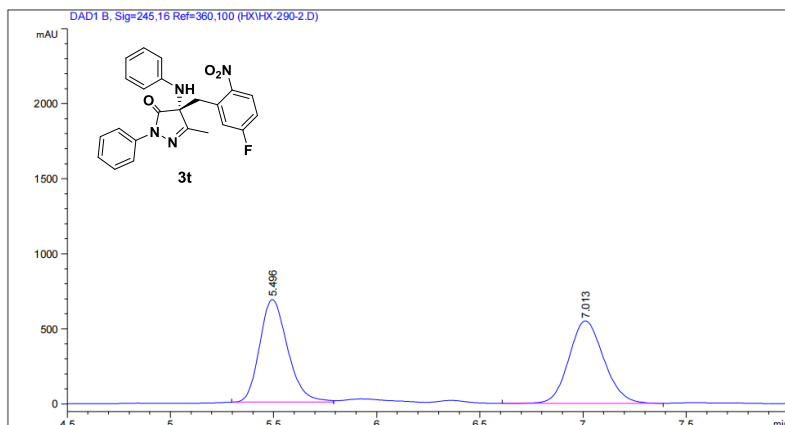

| Peak # | RetTime [min] | Type | Width [min] | Area mAU *s | Height [mAU] | Area %  |
|--------|---------------|------|-------------|-------------|--------------|---------|
| 1      | 5.496         | MM R | 0.1572      | 6458.63379  | 684.60016    | 49.9082 |
| 2      | 7.013         | BV   | 0.1815      | 6482.39404  | 550.14276    | 50.0918 |

## chiral compound

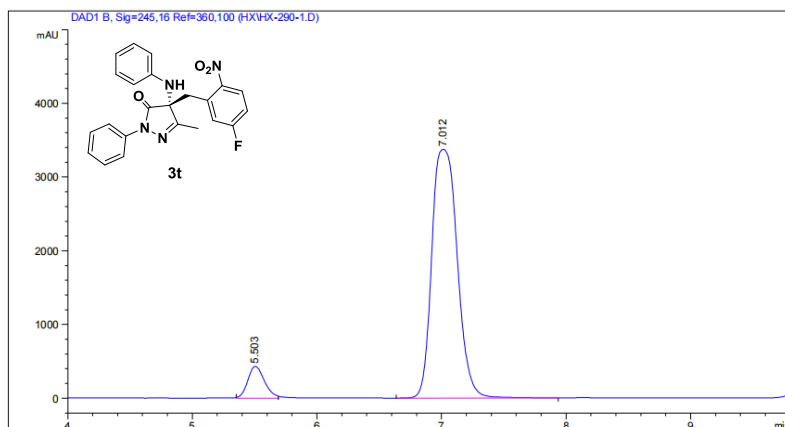

| Peak # | RetTime [min] | Type | Width [min] | Area mAU *s | Height [mAU] | Area %  |
|--------|---------------|------|-------------|-------------|--------------|---------|
| 1      | 5.503         | MM R | 0.1554      | 4049.71533  | 434.28860    | 7.7834  |
| 2      | 7.012         | BV   | 0.2239      | 4.79806e4   | 3374.14600   | 92.2166 |



## HPLC spectra of 3u racemate

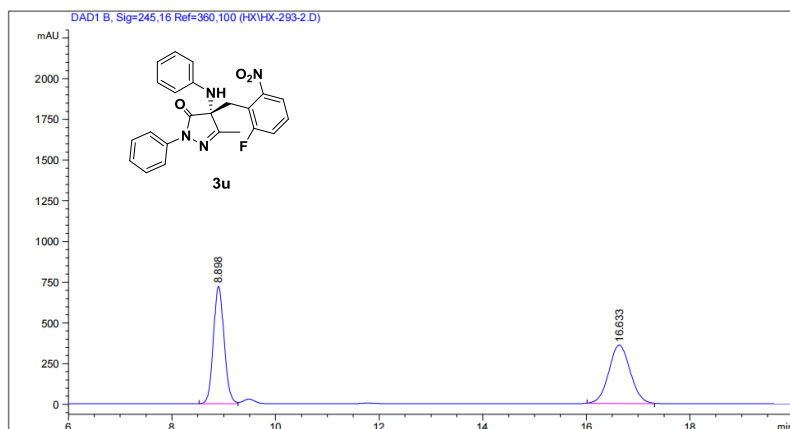

| Peak # | RetTime [min] | Type | Width [min] | Area mAU *s | Height [mAU] | Area %  |
|--------|---------------|------|-------------|-------------|--------------|---------|
| 1      | 8.898         | MM R | 0.2411      | 1.04558e4   | 722.72736    | 50.1207 |
| 2      | 16.633        | MM R | 0.4814      | 1.04054e4   | 360.25122    | 49.8793 |

## chiral compound

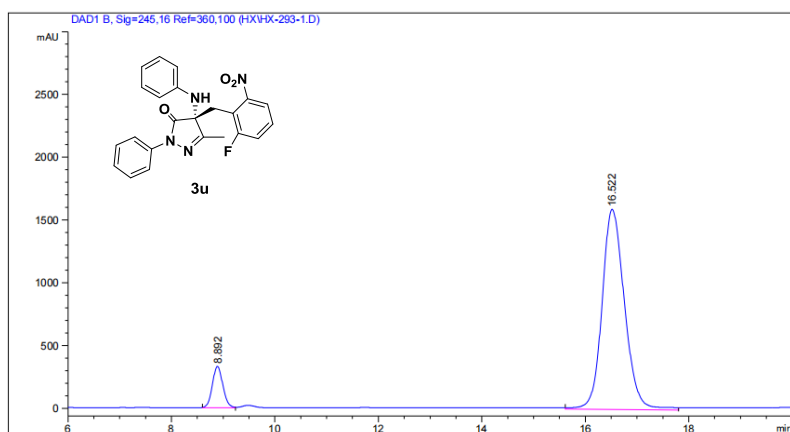

| Peak # | RetTime [min] | Type | Width [min] | Area mAU *s | Height [mAU] | Area %  |
|--------|---------------|------|-------------|-------------|--------------|---------|
| 1      | 8.892         | MM R | 0.2360      | 4680.60986  | 330.57544    | 8.8455  |
| 2      | 16.522        | MM R | 0.5045      | 4.82344e4   | 1593.55518   | 91.1545 |

## HPLC spectra of 3v racemate

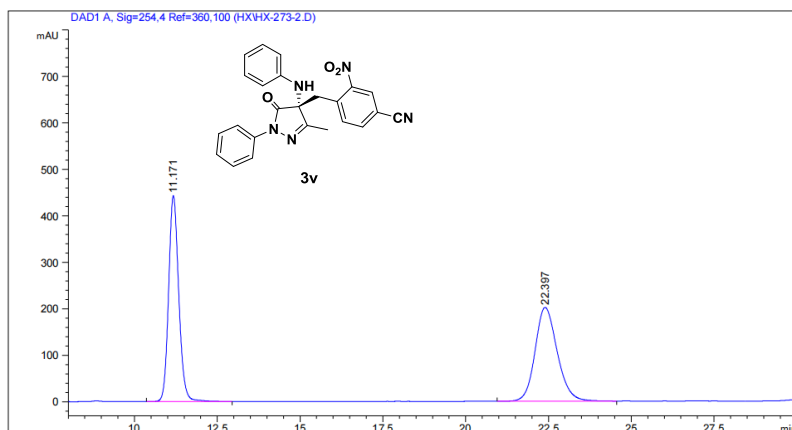

| Peak # | RetTime [min] | Type | Width [min] | Area mAU   | Area *s | Height [mAU] | Area %  |
|--------|---------------|------|-------------|------------|---------|--------------|---------|
| 1      | 11.171        | BB   | 0.3256      | 9401.69727 |         | 443.04437    | 50.0224 |
| 2      | 22.397        | BB   | 0.7134      | 9393.26172 |         | 201.67099    | 49.9776 |

## chiral compound

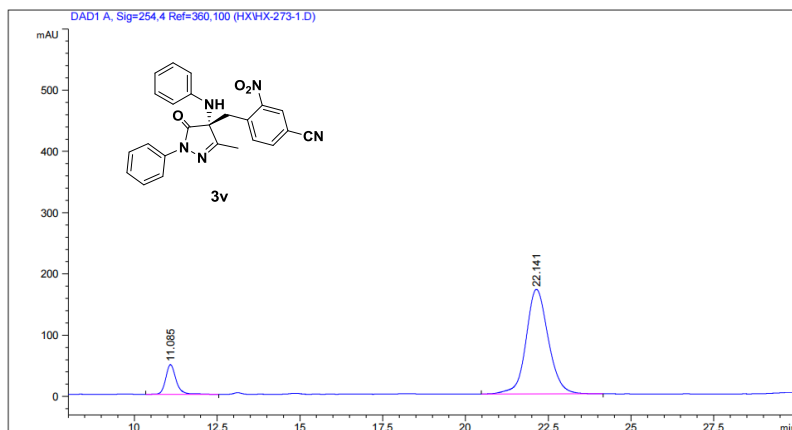

| Peak # | RetTime [min] | Type | Width [min] | Area mAU   | Area *s | Height [mAU] | Area %  |
|--------|---------------|------|-------------|------------|---------|--------------|---------|
| 1      | 11.085        | BB   | 0.3337      | 1072.90198 |         | 48.57457     | 11.8751 |
| 2      | 22.141        | BB   | 0.7099      | 7961.98779 |         | 170.77788    | 88.1249 |

## HPLC spectra of 5a racemate

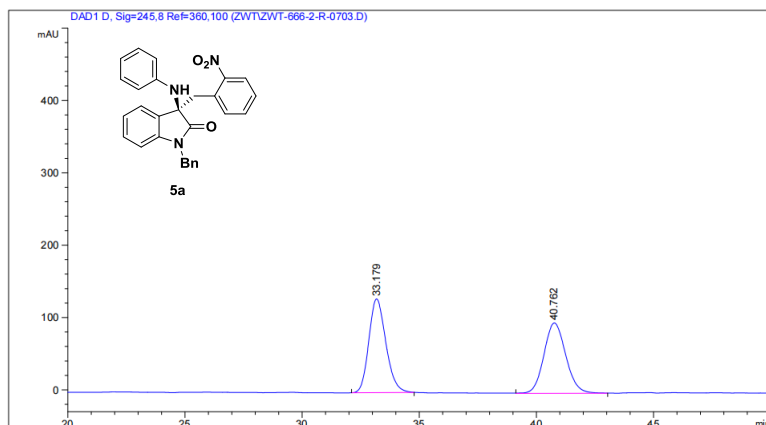

| Peak # | RetTime [min] | Type | Width [min] | Area mAU *s | Height [mAU] | Area %  |
|--------|---------------|------|-------------|-------------|--------------|---------|
| 1      | 33.179        | MM R | 0.8435      | 6555.91992  | 129.53688    | 50.8957 |
| 2      | 40.762        | MM R | 1.0836      | 6325.16260  | 97.28752     | 49.1043 |

## chiral compound

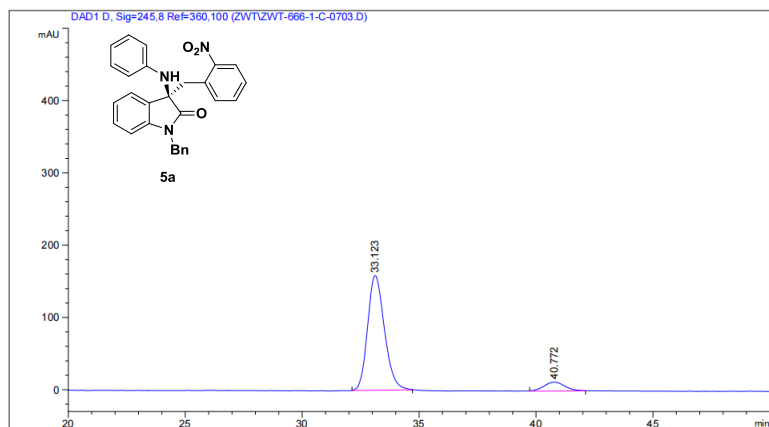

| Peak # | RetTime [min] | Type | Width [min] | Area mAU *s | Height [mAU] | Area %  |
|--------|---------------|------|-------------|-------------|--------------|---------|
| 1      | 33.123        | BB   | 0.7735      | 7967.12451  | 158.76015    | 91.2581 |
| 2      | 40.772        | MM R | 1.0325      | 763.19537   | 12.31930     | 8.7419  |

## HPLC spectra of 5b racemate

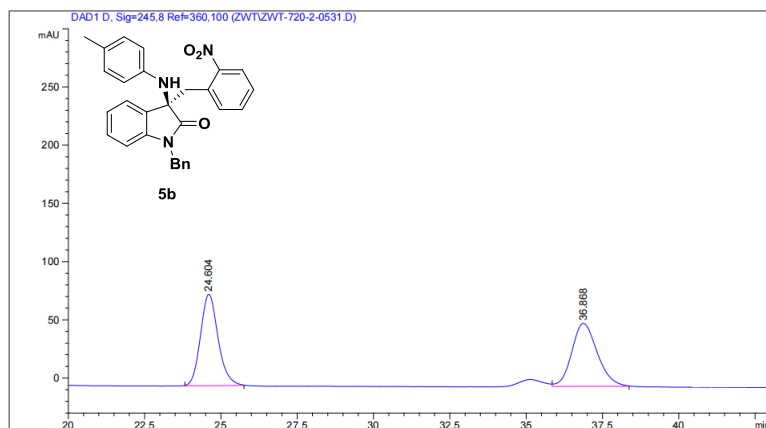

| Peak # | RetTime [min] | Type | Width [min] | Area mAU   | Area *s | Height [mAU] | Area %  |
|--------|---------------|------|-------------|------------|---------|--------------|---------|
| 1      | 24.604        | BB   | 0.6181      | 3149.94507 |         | 78.50486     | 50.0397 |
| 2      | 36.868        | VB   | 0.8646      | 3144.94702 |         | 54.06780     | 49.9603 |

## chiral compound

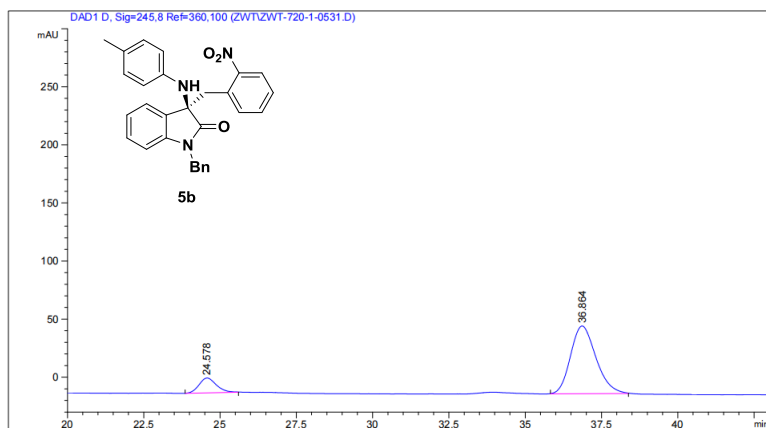

| Peak # | RetTime [min] | Type | Width [min] | Area mAU   | Area *s | Height [mAU] | Area %  |
|--------|---------------|------|-------------|------------|---------|--------------|---------|
| 1      | 24.578        | BB   | 0.5660      | 503.97830  |         | 12.78151     | 12.9859 |
| 2      | 36.864        | BB   | 0.8777      | 3376.99072 |         | 58.30880     | 87.0141 |

## HPLC spectra of 5c racemate

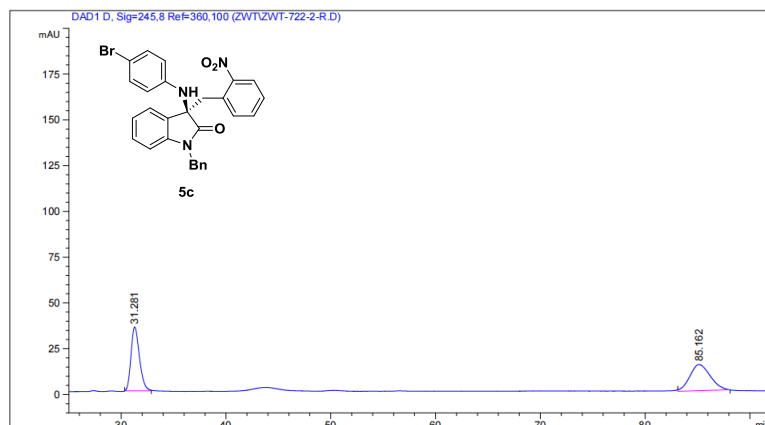

| Peak # | RetTime [min] | Type | Width [min] | Area mAU *s | Height [mAU] | Area %  |
|--------|---------------|------|-------------|-------------|--------------|---------|
| 1      | 31.281        | MM R | 0.9329      | 1955.15674  | 34.92988     | 50.4782 |
| 2      | 85.162        | MM R | 2.2430      | 1918.11255  | 14.25281     | 49.5218 |

## chiral compound

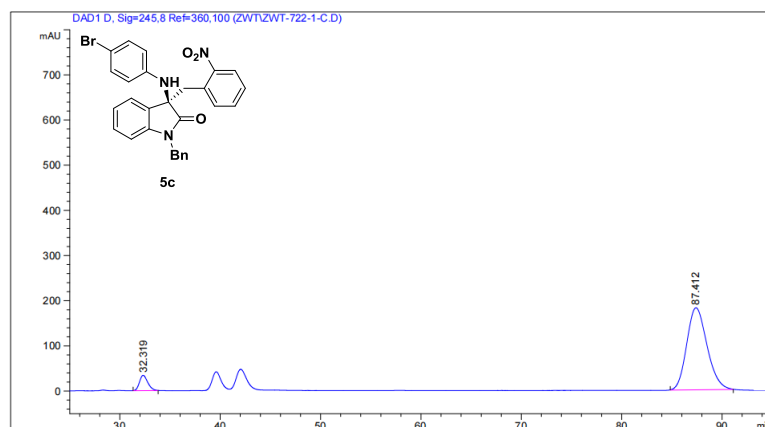

| Peak # | RetTime [min] | Type | Width [min] | Area mAU *s | Height [mAU] | Area %  |
|--------|---------------|------|-------------|-------------|--------------|---------|
| 1      | 32.319        | BB   | 0.8644      | 1944.72217  | 33.94425     | 7.0662  |
| 2      | 87.412        | BB   | 2.0861      | 2.55768e4   | 181.71820    | 92.9338 |

## HPLC spectra of 5d racemate

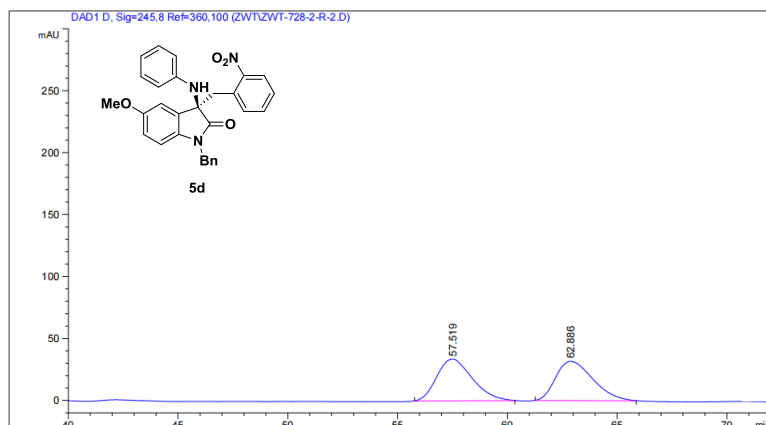

| Peak # | RetTime [min] | Type | Width [min] | Area mAU   | *s | Height [mAU] | Area %  |
|--------|---------------|------|-------------|------------|----|--------------|---------|
| 1      | 57.519        | BB   | 1.3354      | 3802.58984 |    | 33.77673     | 50.3456 |
| 2      | 62.886        | BB   | 1.4555      | 3750.37891 |    | 31.76430     | 49.6544 |

## chiral compound

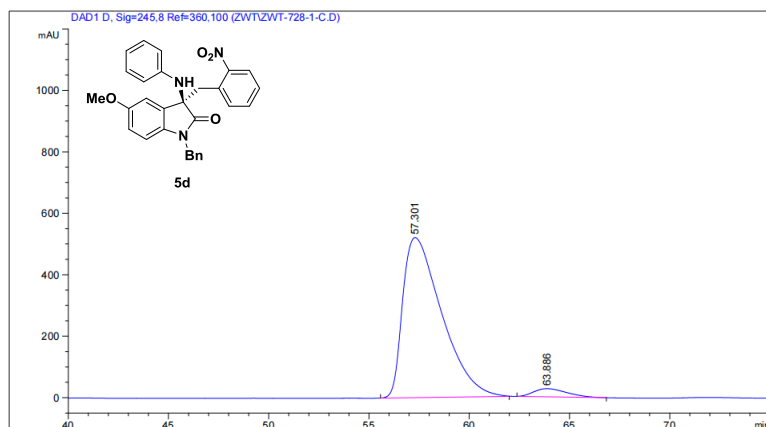

| Peak # | RetTime [min] | Type | Width [min] | Area mAU   | *s | Height [mAU] | Area %  |
|--------|---------------|------|-------------|------------|----|--------------|---------|
| 1      | 57.301        | BB   | 1.9747      | 7.03149e4  |    | 520.94275    | 95.8357 |
| 2      | 63.886        | BB   | 1.3891      | 3055.33813 |    | 26.38337     | 4.1643  |

## HPLC spectra of 5e racemate

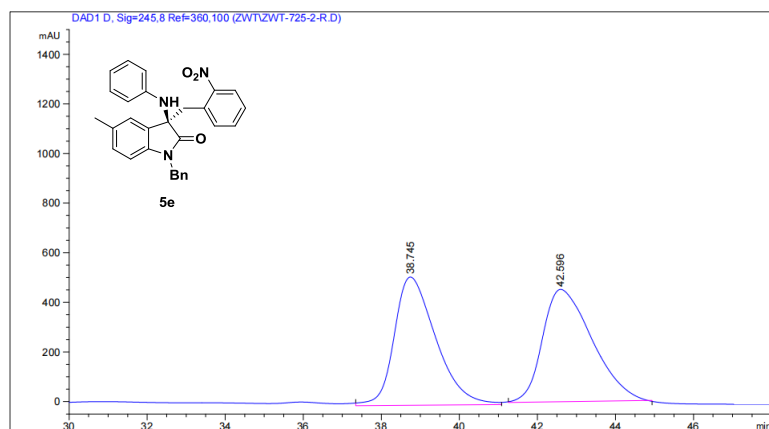

| Peak # | RetTime [min] | Type | Width [min] | Area mAU  | Area *s | Height [mAU] | Area %  |
|--------|---------------|------|-------------|-----------|---------|--------------|---------|
| 1      | 38.745        | MM R | 1.2360      | 3.83311e4 |         | 516.88690    | 48.9499 |
| 2      | 42.596        | MM R | 1.4709      | 3.99756e4 |         | 452.95828    | 51.0501 |

## chiral compound

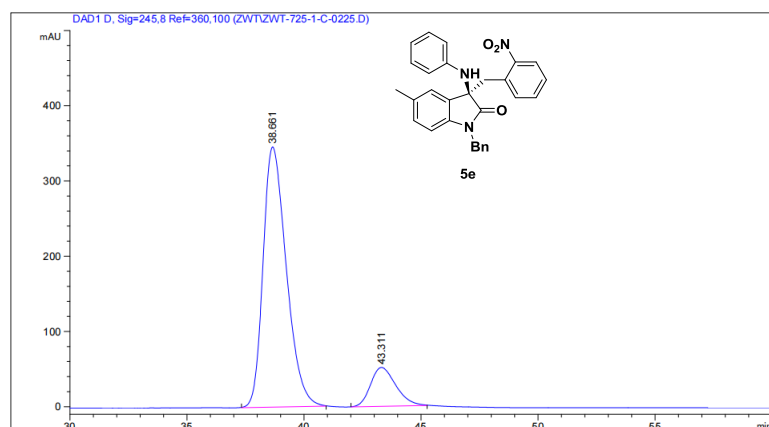

| Peak # | RetTime [min] | Type | Width [min] | Area mAU   | Area *s | Height [mAU] | Area %  |
|--------|---------------|------|-------------|------------|---------|--------------|---------|
| 1      | 38.661        | BB   | 1.0714      | 2.38770e4  |         | 345.88895    | 86.0537 |
| 2      | 43.311        | BB   | 1.1290      | 3869.63794 |         | 51.59584     | 13.9463 |

## HPLC spectra of 5f racemate

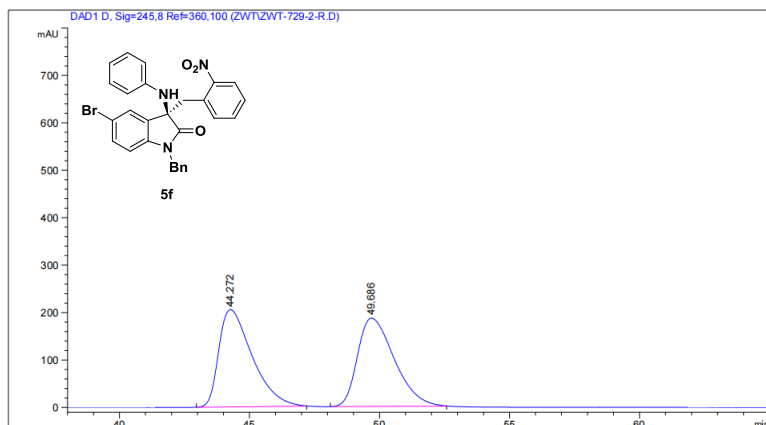

| Peak # | RetTime [min] | Type | Width [min] | Area mAU  | *s | Height [mAU] | Area %  |
|--------|---------------|------|-------------|-----------|----|--------------|---------|
| 1      | 44.272        | BB   | 1.3323      | 1.83129e4 |    | 204.98898    | 50.0254 |
| 2      | 49.686        | BB   | 1.5138      | 1.82943e4 |    | 186.27048    | 49.9746 |

## chiral compound

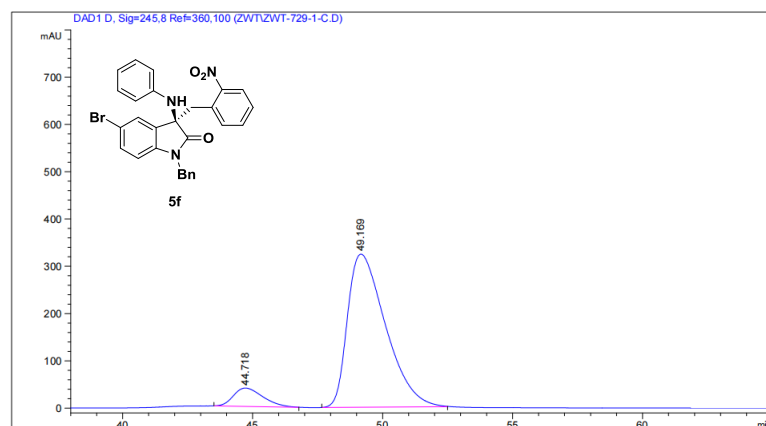

| Peak # | RetTime [min] | Type | Width [min] | Area mAU   | *s | Height [mAU] | Area %  |
|--------|---------------|------|-------------|------------|----|--------------|---------|
| 1      | 44.718        | BB   | 1.1875      | 3062.51782 |    | 38.85547     | 8.4836  |
| 2      | 49.169        | BB   | 1.5619      | 3.30367e4  |    | 323.91385    | 91.5164 |



## HPLC spectra of 5g racemate

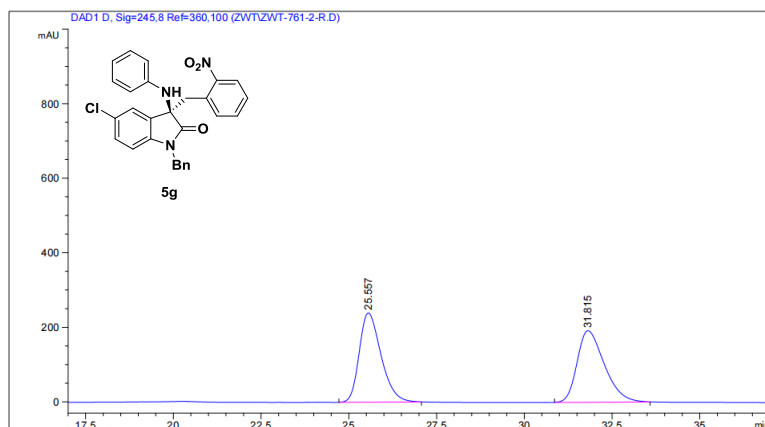

| Peak # | RetTime [min] | Type | Width [min] | Area mAU *s | Height [mAU] | Area %  |
|--------|---------------|------|-------------|-------------|--------------|---------|
| 1      | 25.557        | BB   | 0.6647      | 1.03611e4   | 239.49306    | 50.0043 |
| 2      | 31.815        | BB   | 0.8213      | 1.03593e4   | 192.06451    | 49.9957 |

## chiral compound

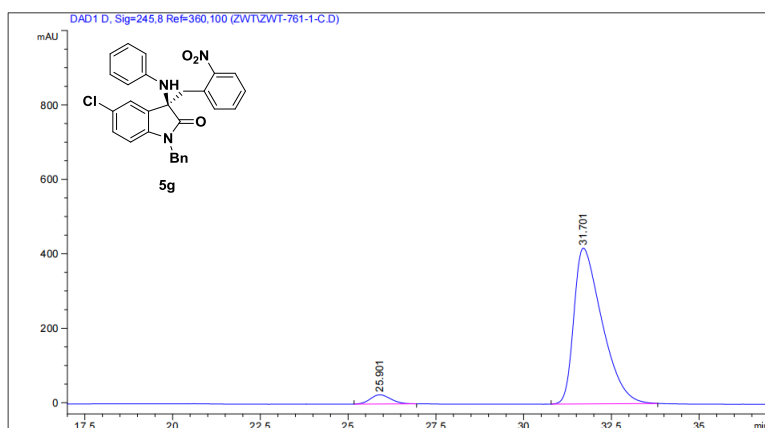

| Peak # | RetTime [min] | Type | Width [min] | Area mAU *s | Height [mAU] | Area %  |
|--------|---------------|------|-------------|-------------|--------------|---------|
| 1      | 25.901        | BB   | 0.6131      | 1003.36798  | 24.74120     | 4.1070  |
| 2      | 31.701        | BB   | 0.8388      | 2.34273e4   | 418.70901    | 95.8930 |

## HPLC spectra of 5h racemate

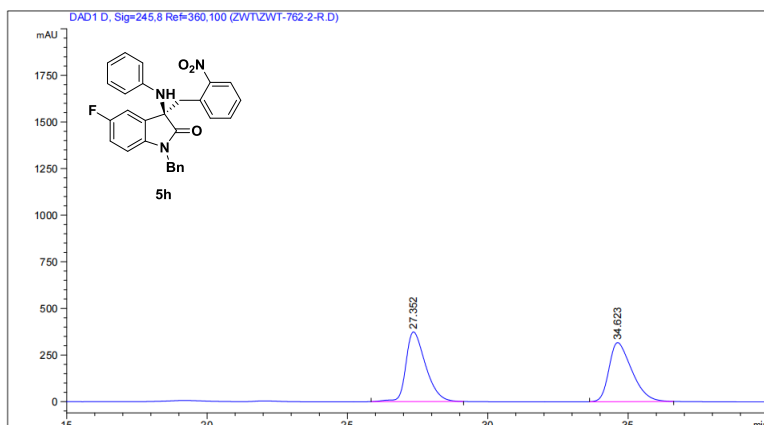

| Peak # | RetTime [min] | Type | Width [min] | Area mAU *s | Height [mAU] | Area %  |
|--------|---------------|------|-------------|-------------|--------------|---------|
| 1      | 27.352        | BB   | 0.7360      | 1.82564e4   | 373.68207    | 50.4606 |
| 2      | 34.623        | BB   | 0.8618      | 1.79231e4   | 316.93573    | 49.5394 |

## chiral compound

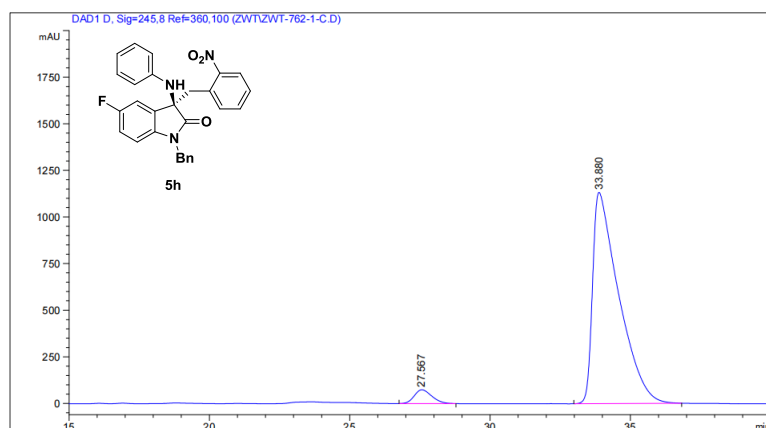

| Peak # | RetTime [min] | Type | Width [min] | Area mAU *s | Height [mAU] | Area %  |
|--------|---------------|------|-------------|-------------|--------------|---------|
| 1      | 27.567        | BB   | 0.6623      | 3255.92480  | 74.14738     | 4.2500  |
| 2      | 33.880        | BB   | 0.9112      | 7.33543e4   | 1133.27600   | 95.7500 |

## HPLC spectra of 5i racemate

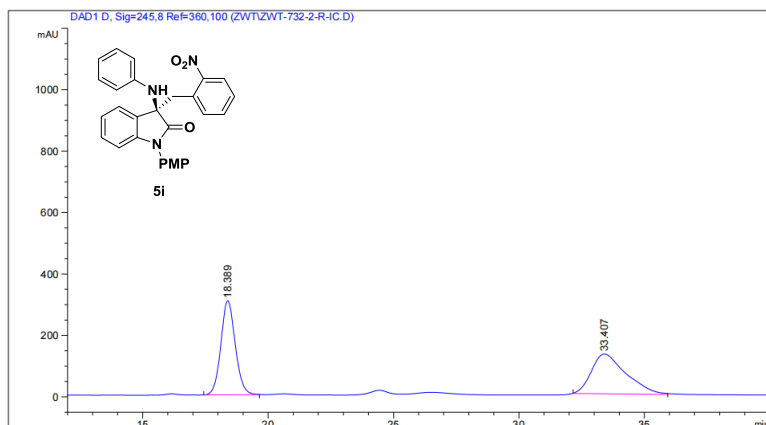

| Peak # | RetTime [min] | Type | Width [min] | Area mAU  | *s | Height [mAU] | Area %  |
|--------|---------------|------|-------------|-----------|----|--------------|---------|
| 1      | 18.389        | BB   | 0.6110      | 1.22146e4 |    | 306.44577    | 49.6215 |
| 2      | 33.407        | MM R | 1.5967      | 1.24009e4 |    | 129.44260    | 50.3785 |

## chiral compound

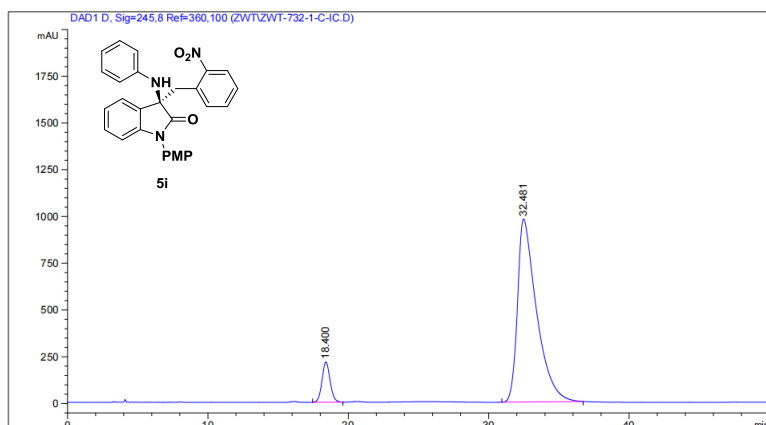

| Peak # | RetTime [min] | Type | Width [min] | Area mAU   | *s | Height [mAU] | Area %  |
|--------|---------------|------|-------------|------------|----|--------------|---------|
| 1      | 18.400        | BB   | 0.6130      | 8645.40039 |    | 215.95935    | 8.5697  |
| 2      | 32.481        | BB   | 1.3712      | 9.22384e4  |    | 978.98431    | 91.4303 |

## HPLC spectra of 5j racemate

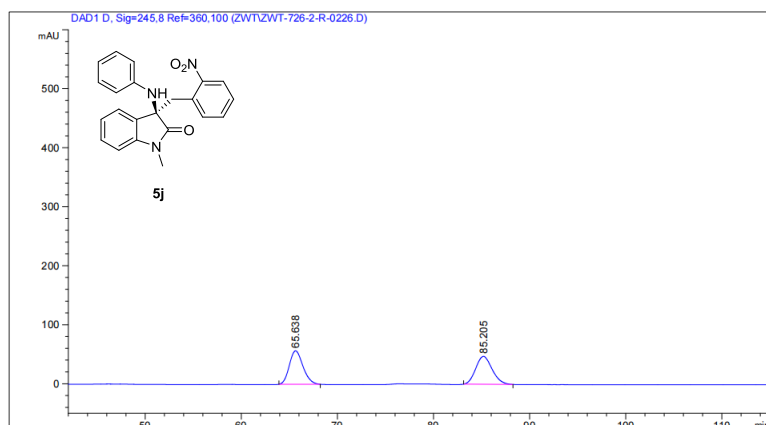

| Peak # | RetTime [min] | Type | Width [min] | Area mAU   | Area *s | Height [mAU] | Area %  |
|--------|---------------|------|-------------|------------|---------|--------------|---------|
| 1      | 65.638        | BB   | 1.4615      | 5619.28613 |         | 56.83198     | 49.9820 |
| 2      | 85.205        | BB   | 1.5143      | 5623.33691 |         | 47.39162     | 50.0180 |

## chiral compound

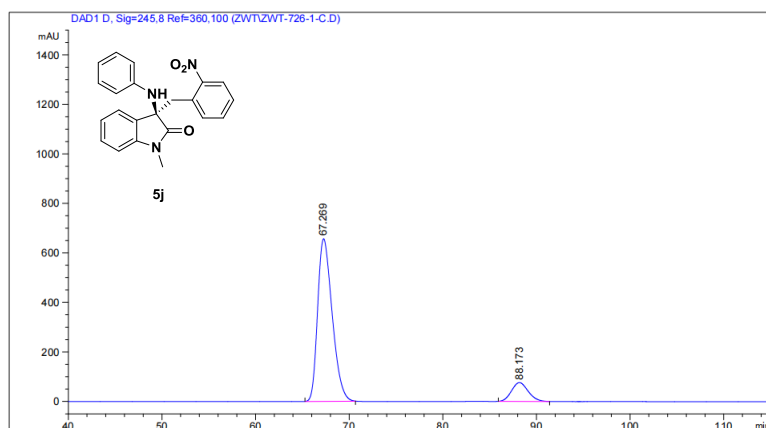

| Peak # | RetTime [min] | Type | Width [min] | Area mAU   | Area *s | Height [mAU] | Area %  |
|--------|---------------|------|-------------|------------|---------|--------------|---------|
| 1      | 67.269        | BB   | 1.6663      | 7.08282e4  |         | 656.70953    | 88.2834 |
| 2      | 88.173        | BB   | 1.7748      | 9399.99707 |         | 76.11349     | 11.7166 |

## HPLC spectra of 5k racemate

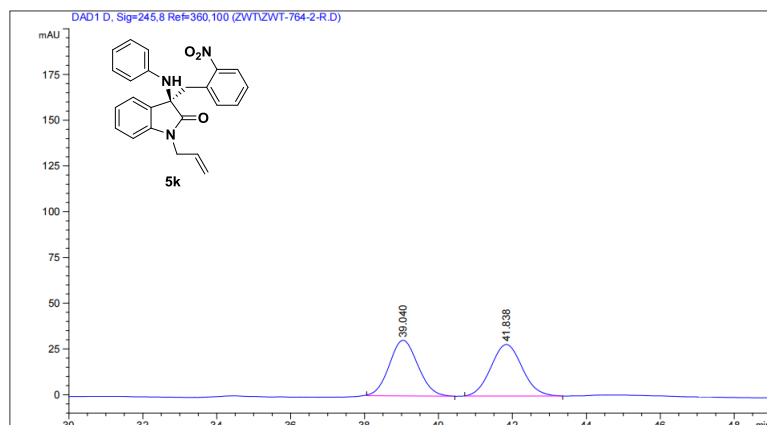

| Peak # | RetTime [min] | Type | Width [min] | Area mAU *s | Height [mAU] | Area %  |
|--------|---------------|------|-------------|-------------|--------------|---------|
| 1      | 39.040        | BB   | 0.7737      | 1641.82556  | 30.41783     | 49.6752 |
| 2      | 41.838        | BB   | 0.7844      | 1663.29626  | 28.18859     | 50.3248 |

## chiral compound

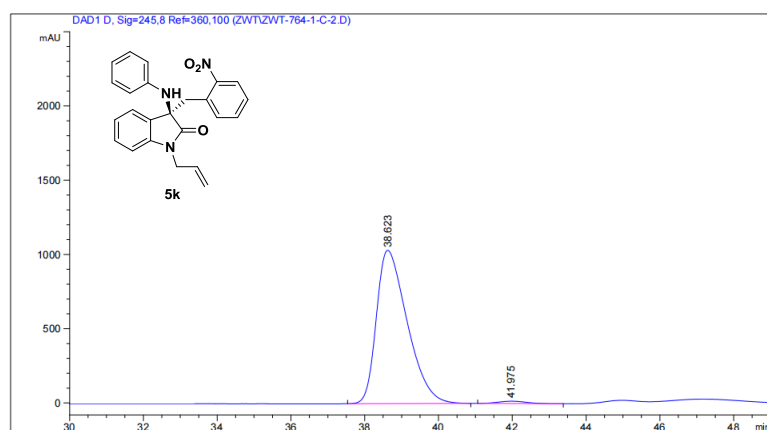

| Peak # | RetTime [min] | Type | Width [min] | Area mAU *s | Height [mAU] | Area %  |
|--------|---------------|------|-------------|-------------|--------------|---------|
| 1      | 38.623        | BB   | 0.8869      | 5.98987e4   | 1032.37012   | 98.5992 |
| 2      | 41.975        | BB   | 0.6420      | 850.98523   | 15.85870     | 1.4008  |

## HPLC spectra of 5I racemate

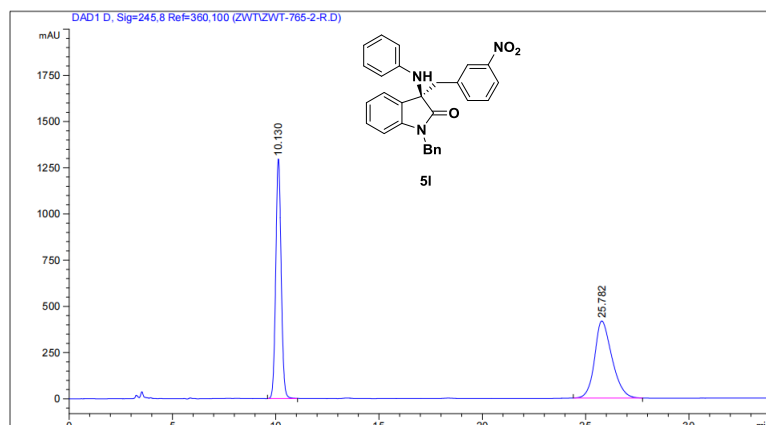

| Peak # | RetTime [min] | Type | Width [min] | Area mAU *s | Height [mAU] | Area %  |
|--------|---------------|------|-------------|-------------|--------------|---------|
| 1      | 10.130        | BB   | 0.2829      | 2.36681e4   | 1296.80359   | 49.2829 |
| 2      | 25.782        | BB   | 0.8769      | 2.43569e4   | 417.34329    | 50.7171 |

## chiral compound

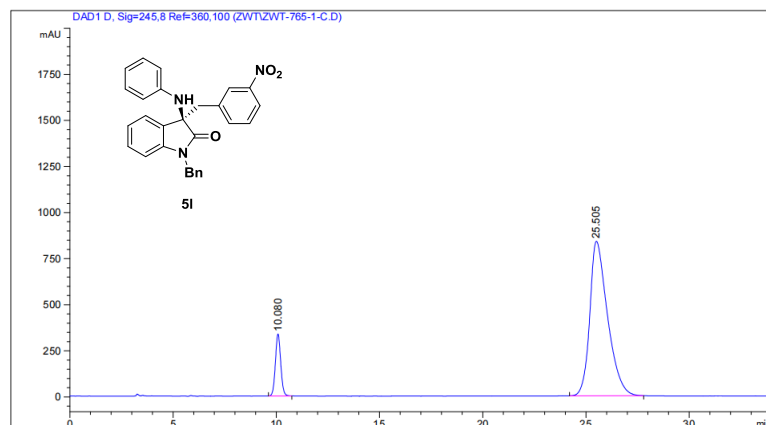

| Peak # | RetTime [min] | Type | Width [min] | Area mAU *s | Height [mAU] | Area %  |
|--------|---------------|------|-------------|-------------|--------------|---------|
| 1      | 10.080        | BB   | 0.2776      | 6051.52148  | 336.78287    | 10.7588 |
| 2      | 25.505        | BB   | 0.8803      | 5.01954e4   | 838.58313    | 89.2412 |

## HPLC spectra of 5m racemate

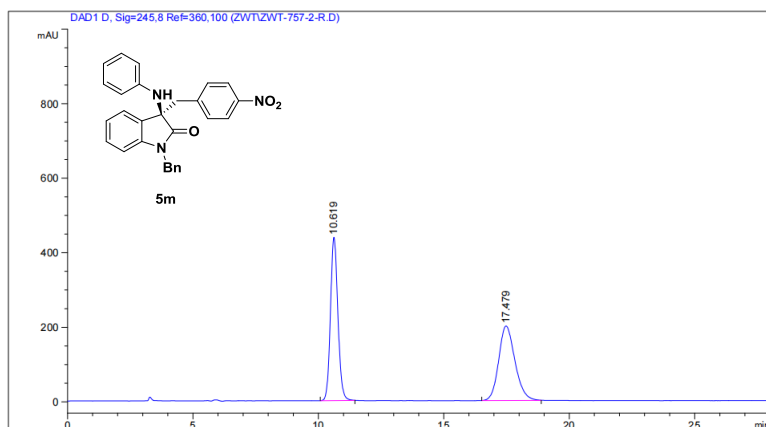

| Peak # | RetTime [min] | Type | Width [min] | Area mAU *s | Height [mAU] | Area %  |
|--------|---------------|------|-------------|-------------|--------------|---------|
| 1      | 10.619        | BB   | 0.3165      | 9033.90234  | 438.19180    | 50.0372 |
| 2      | 17.479        | BB   | 0.6845      | 9020.45801  | 199.88538    | 49.9628 |

## chiral compound

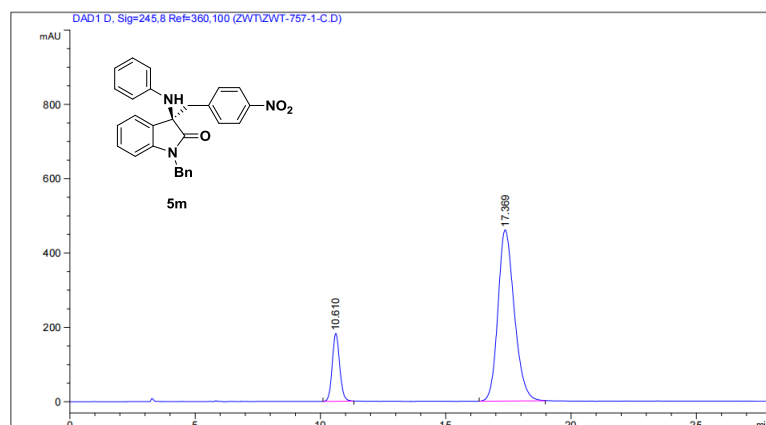

| Peak # | RetTime [min] | Type | Width [min] | Area mAU *s | Height [mAU] | Area %  |
|--------|---------------|------|-------------|-------------|--------------|---------|
| 1      | 10.610        | BB   | 0.3189      | 3770.53589  | 182.61259    | 15.2881 |
| 2      | 17.369        | BB   | 0.6932      | 2.08926e4   | 460.58722    | 84.7119 |

## HPLC spectra of 5n racemate

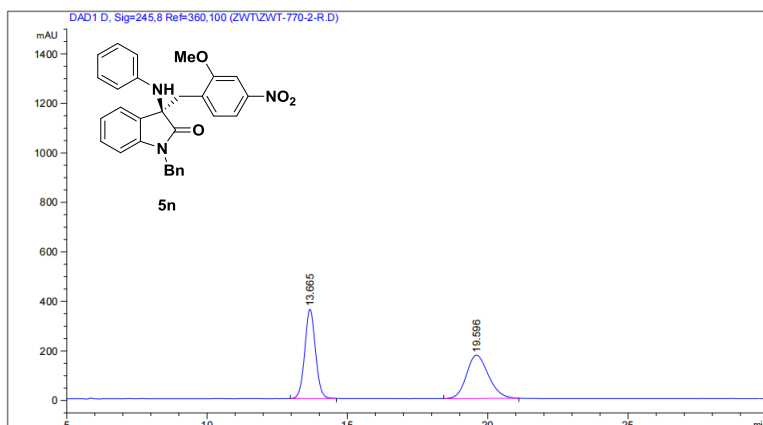

| Peak # | RetTime [min] | Type | Width [min] | Area mAU *s | Height [mAU] | Area %  |
|--------|---------------|------|-------------|-------------|--------------|---------|
| 1      | 13.665        | BB   | 0.4083      | 9598.02051  | 360.85202    | 50.2002 |
| 2      | 19.596        | BB   | 0.8316      | 9521.45898  | 175.32883    | 49.7998 |

## chiral compound

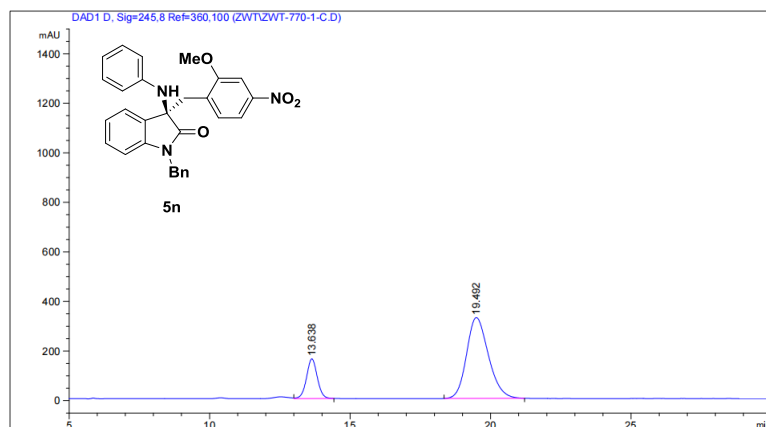

| Peak # | RetTime [min] | Type | Width [min] | Area mAU *s | Height [mAU] | Area %  |
|--------|---------------|------|-------------|-------------|--------------|---------|
| 1      | 13.638        | VB   | 0.4102      | 4258.50293  | 160.18808    | 19.4005 |
| 2      | 19.492        | BB   | 0.8285      | 1.76920e4   | 326.32584    | 80.5995 |



## HPLC spectra of 5o racemate

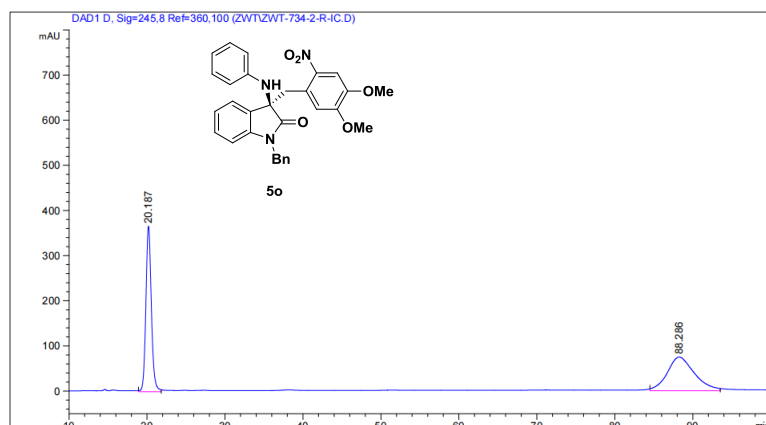

| Peak # | RetTime [min] | Type | Width [min] | Area mAU  | Area *s | Height [mAU] | Area %  |
|--------|---------------|------|-------------|-----------|---------|--------------|---------|
| 1      | 20.187        | MM R | 0.8144      | 1.79183e4 |         | 366.69794    | 49.6941 |
| 2      | 88.286        | MM R | 4.0493      | 1.81389e4 |         | 74.65785     | 50.3059 |

## chiral compound

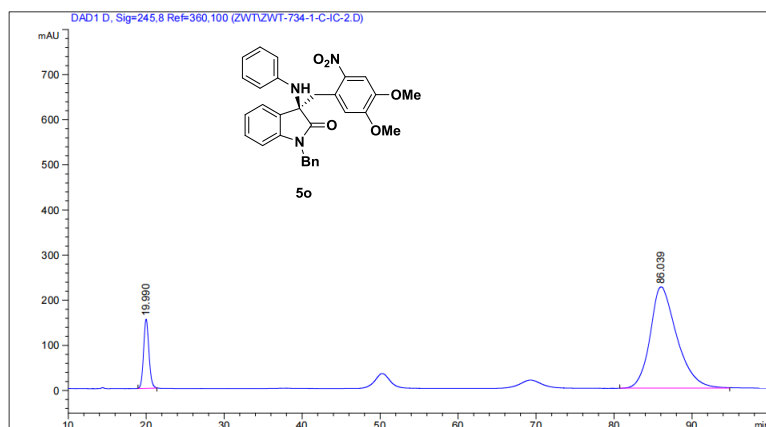

| Peak # | RetTime [min] | Type | Width [min] | Area mAU   | Area *s | Height [mAU] | Area %  |
|--------|---------------|------|-------------|------------|---------|--------------|---------|
| 1      | 19.990        | BB   | 0.7300      | 7279.75244 |         | 153.30196    | 11.9996 |
| 2      | 86.039        | MM R | 3.9652      | 5.33871e4  |         | 224.39896    | 88.0004 |

## HPLC spectra of 5p racemate

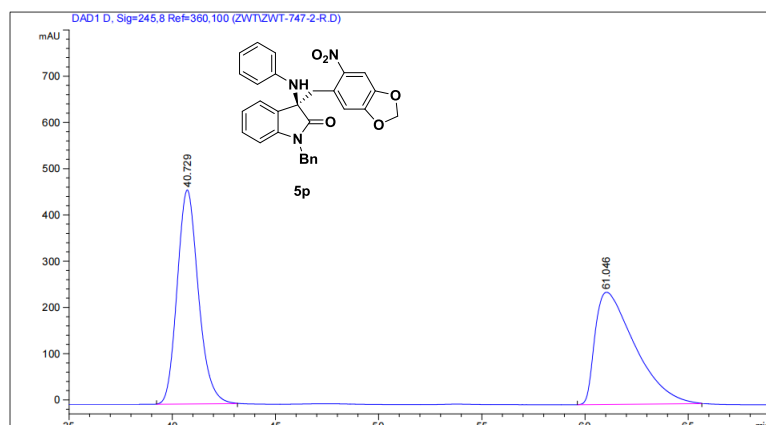

| Peak # | RetTime [min] | Type | Width [min] | Area mAU *s | Height [mAU] | Area %  |
|--------|---------------|------|-------------|-------------|--------------|---------|
| 1      | 40.729        | BB   | 1.1037      | 3.30754e4   | 462.85052    | 50.3640 |
| 2      | 61.046        | BB   | 1.8543      | 3.25973e4   | 242.50082    | 49.6360 |

## chiral compound

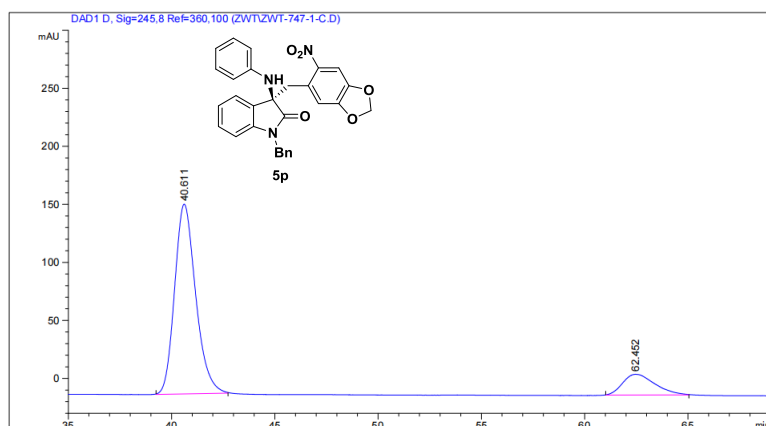

| Peak # | RetTime [min] | Type | Width [min] | Area mAU *s | Height [mAU] | Area %  |
|--------|---------------|------|-------------|-------------|--------------|---------|
| 1      | 40.611        | BB   | 1.0791      | 1.15934e4   | 163.52388    | 85.7461 |
| 2      | 62.452        | BB   | 1.2744      | 1927.20801  | 17.83901     | 14.2539 |

## HPLC spectra of 5q racemate

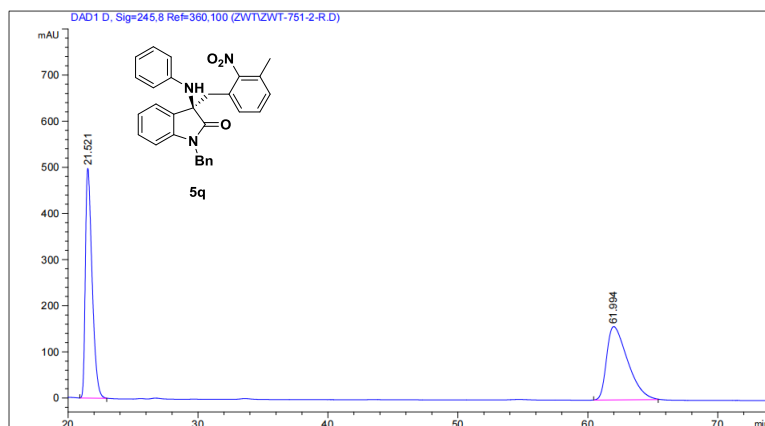

| Peak # | RetTime [min] | Type | Width [min] | Area mAU  | Height [mAU] | Area %  |
|--------|---------------|------|-------------|-----------|--------------|---------|
| 1      | 21.521        | BB   | 0.5551      | 1.79742e4 | 497.96985    | 50.1471 |
| 2      | 61.994        | BB   | 1.6156      | 1.78687e4 | 158.93817    | 49.8529 |

## chiral compound

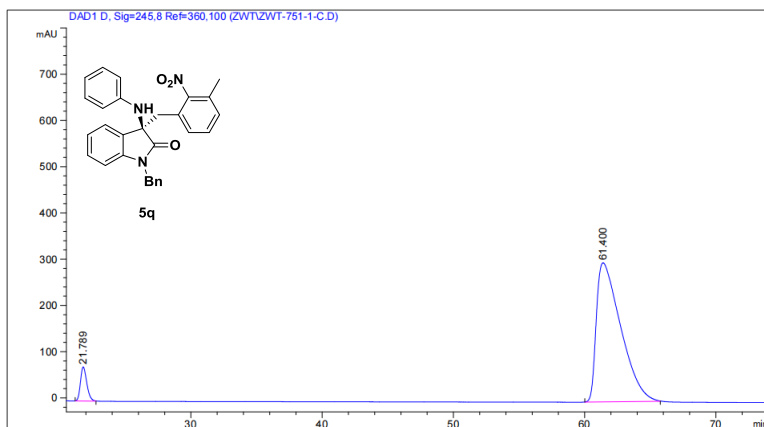

| Peak # | RetTime [min] | Type | Width [min] | Area mAU   | Height [mAU] | Area %  |
|--------|---------------|------|-------------|------------|--------------|---------|
| 1      | 21.789        | BB   | 0.5175      | 2478.22656 | 73.84467     | 6.0096  |
| 2      | 61.400        | BB   | 1.7964      | 3.87597e4  | 300.58850    | 93.9904 |

## HPLC spectra of 5r racemate

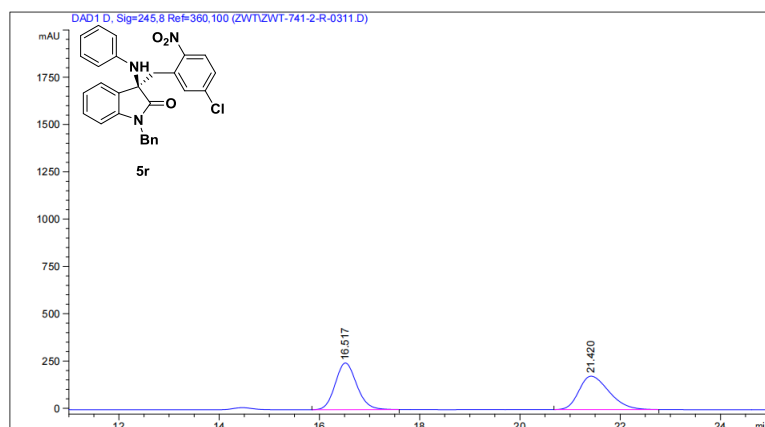

| Peak # | RetTime [min] | Type | Width [min] | Area [mAU*s] | Height [mAU] | Area %  |
|--------|---------------|------|-------------|--------------|--------------|---------|
| 1      | 16.517        | BB   | 0.4638      | 7400.93506   | 246.85519    | 50.0258 |
| 2      | 21.420        | BB   | 0.6504      | 7393.30273   | 176.62201    | 49.9742 |

## chiral compound

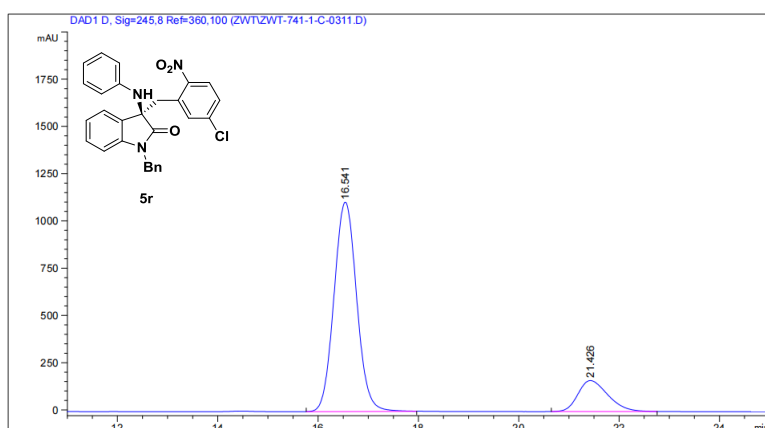

| Peak # | RetTime [min] | Type | Width [min] | Area [mAU*s] | Height [mAU] | Area %  |
|--------|---------------|------|-------------|--------------|--------------|---------|
| 1      | 16.541        | BB   | 0.4904      | 3.47762e4    | 1107.23792   | 83.6137 |
| 2      | 21.426        | BB   | 0.6450      | 6815.30273   | 163.95471    | 16.3863 |

## HPLC spectra of 6a racemate

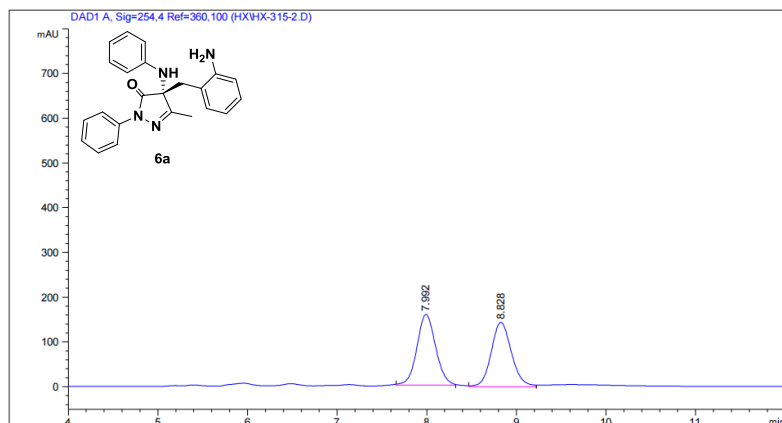

| Peak # | RetTime [min] | Type | Width [min] | Area mAU *s | Height [mAU] | Area %  |
|--------|---------------|------|-------------|-------------|--------------|---------|
| 1      | 7.992         | MM R | 0.2417      | 2285.12598  | 157.58295    | 50.0956 |
| 2      | 8.828         | MM R | 0.2629      | 2276.40747  | 144.29836    | 49.9044 |

## chiral compound

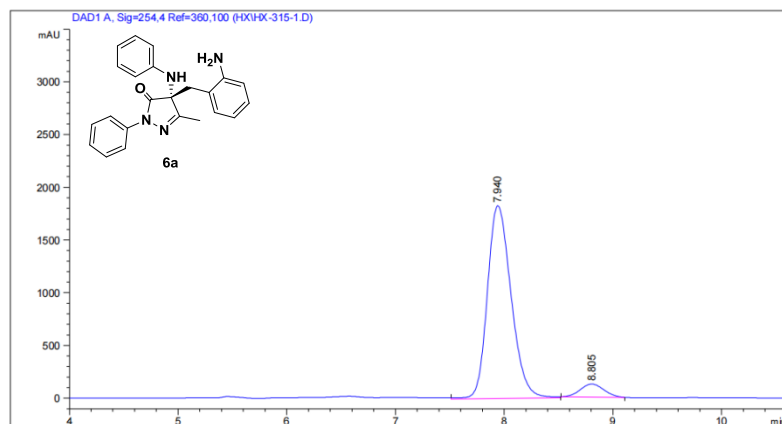

| Peak # | RetTime [min] | Type | Width [min] | Area mAU *s | Height [mAU] | Area %  |
|--------|---------------|------|-------------|-------------|--------------|---------|
| 1      | 7.940         | MM R | 0.2529      | 2.77238e4   | 1827.36926   | 93.7828 |
| 2      | 8.805         | MM R | 0.2493      | 1837.92627  | 122.85209    | 6.2172  |
